# Supplementary material
Source: Royal Society of Chemistry journal article supplement (doi:10.1039/d6tc00601a)
Supplement: d6tc00601a1.pdf [file d6tc00601a1.pdf]

1 **Electronic Supplementary Information**

2  
3 **Cost-efficient quinoxaline-based semiconducting polymers: systematic**  
4 **structure–property–morphology correlation toward reliable organic field-**  
5 **effect transistors**

6  
7 Yuta Otake,<sup>a</sup> Atsushi Isobe,<sup>a</sup> Ting-Yu Wang,<sup>b</sup> Chu-Chen Chueh,<sup>b</sup> Masayuki Wakioka,<sup>c</sup> and  
8 Tsuyoshi Michinobu<sup>a,\*</sup>

9  
10 <sup>a</sup> *Department of Materials Science and Engineering, Institute of Science Tokyo, 2-12-1 Ookayama,*  
11 *Meguro-ku, Tokyo 152-8552, Japan*

12  
13 <sup>b</sup> *Department of Chemical Engineering, National Taiwan University, Taipei 10617, Taiwan*

14  
15 <sup>c</sup> *Sagami Chemical Research Institute, 2743-1 Hayakawa, Ayase, Kanagawa 252-1193, Japan*

16  
17 E-mail: michinobu@mct.isct.ac.jp

18  
19  
20 **Contents**

21

|    |                                              |     |
|----|----------------------------------------------|-----|
| 22 | <b>1. General and Materials</b>              | S2  |
| 23 | <b>2. Experimental Procedures</b>            | S2  |
| 24 | <b>3. Fig. S1–S21</b>                        | S15 |
| 25 | <b>4. Tables S1–S5</b>                       | S30 |
| 26 | <b>5. Spectra (NMR, MALDI-TOF-MS, FT-IR)</b> | S33 |
| 27 | <b>6. Computed Data</b>                      | S46 |
| 28 | <b>7. References</b>                         | S54 |

29

## 1 **1. General and Materials**

### 2 **General**

3 <sup>1</sup>H (400 MHz), <sup>13</sup>C (100 MHz), and <sup>19</sup>F (376 MHz) NMR spectra were measured on a JEOL JNM-  
4 ECZ400S spectrometer at ambient temperature. CDCl<sub>3</sub> was used as the solvent, and tetramethylsilane (TMS)  
5 was used as an internal standard ( $\delta = 0.00$  ppm) for <sup>1</sup>H and <sup>13</sup>C NMR measurements. For <sup>19</sup>F NMR  
6 measurements, trifluoroacetic acid (TFA) was used as an internal standard ( $\delta = -76.3$  ppm).<sup>S1</sup> Structural  
7 assignments were made based on <sup>1</sup>H–<sup>1</sup>H COSY, g-HSQC, g-HMBC, and DEPT-135 NMR experiments.  
8 Infrared (IR) spectra were recorded using a JASCO FT/IR-4200 spectrometer with a resolution of 4 cm<sup>-1</sup>,  
9 and absorption bands are reported in wavenumbers (cm<sup>-1</sup>). Thermogravimetric analysis (TGA) and  
10 differential scanning calorimetry (DSC) measurements were carried out on a Rigaku TG8120 and Rigaku  
11 DSC8230, respectively. Absorption spectra were measured on a JASCO V-670 spectrometer.  
12 Electrochemical measurements using cyclic voltammetry (CV) were performed with a BAS Model 612C  
13 electrochemical analyzer with a three-electrode cell. Photoelectron yield spectroscopy (PYS) measurements  
14 were performed using an AC-2S spectrometer (Riken Keiki Co., Ltd.) equipped with a deuterium lamp.  
15 MALDI-TOF mass spectra were recorded on a Shimadzu MALDI-8030 mass spectrometer equipped with a  
16 solid-state laser operating at a wavelength of 355 nm. The laser repetition rate was set to 200 Hz during the  
17 measurements. All calculations were conducted using a Gaussian 16 suite program (G16RevC.02).<sup>S2</sup>  
18 Geometry optimizations were performed at the  $\omega$ B97XD/6-31G(d,p) level of theory. Frontier molecular  
19 orbital (HOMO and LUMO) and natural bond orbital (NBO) analyses were performed based on the  
20 optimized geometries at the same level of theory. For computational efficiency, all alkyl side chains were  
21 simplified to methyl groups. Organic field-effect transistor (OFET) devices were characterized using a  
22 Keithley 4200-SCS.

### 24 **Materials**

25 1,2-Diamino-4,5-difluorobenzene and (3,3'-difluoro-[2,2'-bithiophene]-5,5'-diyl)bis(trimethylstannane)  
26 were purchased from BLD Pharm. P(*tert*-Bu)<sub>3</sub> Pd G3 was purchased from ChemScene. 19-(3-  
27 Iodopropyl)heptatriacontane was purchased from Lyntech Co., Ltd. 2,5-Bis(trimethylstannyl)thiophene was  
28 purchased from Tokyo Chemical Industry Co., Ltd. (TCI). 2,5-Bis(trimethylstannyl)thieno[3,2-*b*]thiophene  
29 and tripotassium phosphate were purchased from Sigma-Aldrich Co., Ltd. Other reagents were purchased  
30 from commercial sources and used without further purification. 5,8-Dibromo-6,7-difluoroquinoxalin-2-ol  
31 (**Qx-3**) was prepared according to a reported method.<sup>S3</sup> Silica-gel column chromatography was performed  
32 using Silica Gel 60 (spherical) and Silica Gel 60N (spherical, neutral) from Kanto Chemical Co., Inc.,  
33 YAMAZEN Universal Premium L, or Biotage® Sfär Silica D, on a Biotage® Isolera One system equipped  
34 with UV–vis detection (250–400 nm).

## 36 **2. Experimental Procedures**

### 37 **2.1. Measurements**

#### 38 **Gel Permeation Chromatography (GPC)**

1 GPC curves, number-average molecular weight ( $M_n$ ), weight-average molecular weight ( $M_w$ ), and  
2 polydispersity index (PDI;  $M_w/M_n$ ) of the polymers were measured using a JASCO CO-2065 Plus system  
3 equipped with a pump (PU-2080 Plus), a refractive index (RI) detector (RI-2031 Plus), and a UV-vis  
4 absorbance detector (UV-2075 Plus, detection wavelength: 600 nm). 1,2-Dichlorobenzene (*o*-DCB) was  
5 used as eluent at 40 °C, calibrated using polystyrene standards. Measurements were carried out on two  
6 Shodex KF-803 columns (8.0 mm i.d. × 300 mm) at a flow rate of 0.5 mL min<sup>-1</sup>. Polymer solutions (ca. 1  
7 mg mL<sup>-1</sup>) were used for analysis.

### 9 **Matrix-Assisted Laser Desorption/Ionization Time-of-Flight Mass Spectrometry (MALDI-TOF-MS)**

10 For MALDI-TOF MS measurements, samples were prepared using appropriate organic matrices. For  
11 polymers **P1**, **P2**, **P4**, and **P6**, chloroform solutions of the polymers (1 mg mL<sup>-1</sup>) were mixed with matrix  
12 solutions (*trans*-2-[3-(4-*tert*-butylphenyl)-2-methyl-2-propenylidene]malononitrile (DCTB) for **P1**, **P2**, and  
13 **P4** and dithranol for **P6** in chloroform (20 mg mL<sup>-1</sup>) at a volume ratio of 1:1 (50 μL each)), followed by  
14 sonication to ensure homogeneous mixing. A 1 μL aliquot of each resulting mixture was deposited onto a  
15 Shimadzu FleXiMass-SR48 MALDI target plate. For polymers **P3** and **P5**, chloroform solutions of the  
16 polymers (1 mg mL<sup>-1</sup>, 1 μL) were first deposited onto the plate, followed by deposition of 1 μL of matrix  
17 solutions (DCTB for **P3** and dithranol for **P5** in chloroform (20 mg mL<sup>-1</sup>) containing 0.05 vol% TFA). For  
18 **Qx-5**, a chloroform solution of the compound (1 mg mL<sup>-1</sup>, 1 μL) was first deposited onto the plate, followed  
19 by deposition of 1 μL of a dithranol matrix solution in THF (10 mg mL<sup>-1</sup>) containing 0.05 vol% TFA. For  
20 all samples, the deposited spots were allowed to dry under ambient conditions for more than 30 minutes  
21 prior to measurement.

### 23 **Thermogravimetric Analysis (TGA)**

24 TGA was performed using approximately 1–2 mg of sample placed in an aluminum pan under a  
25 nitrogen purge (500 mL min<sup>-1</sup>) at a heating rate of 10 °C min<sup>-1</sup> over a temperature range from 0 to 500 °C.

### 27 **Differential Scanning Calorimetry (DSC)**

28 DSC measurements were performed using approximately 2–3 mg of sample sealed in an aluminum  
29 pan with a lid under a nitrogen purge (150 mL min<sup>-1</sup>). After determination of the 5% degradation  
30 temperature, heating and cooling cycles were carried out over a temperature range from 0 to 300 °C at a  
31 heating/cooling rate of 10 °C min<sup>-1</sup>, starting from room temperature and repeated three times. The second  
32 heating and cooling cycles were used to discuss thermal properties.

### 34 **Absorption Spectra**

35 Film:

36 Approximately 50–100 μL of a polymer solution in chloroform (0.5–1 mg mL<sup>-1</sup>) was cast onto a quartz  
37 glass substrate (1 cm width) and dried at room temperature for at least 30 min. UV-vis absorption spectra  
38 of the as-cast films were measured over the wavelength range of 250–850 nm, and the optical bandgaps

1 were determined from the as-cast films. Subsequently, the film was thermally annealed at 200 °C or 300 °C  
2 for 15 min, and the UV–vis absorption spectra were recorded again over the same wavelength range.

3 Solution:

4 UV–vis absorption spectra of the polymer solutions ( $10^{-5}$  M in chloroform) were measured using a  
5 quartz cuvette over the wavelength range of 250–1000 nm. Temperature-dependent measurements were  
6 carried out during both heating and cooling between 15 and 55 °C in 10 °C increments. Spectra were  
7 recorded after the temperature was stabilized at each set point.

### 9 Photoelectron Yield Spectroscopy (PYS)

10 The HOMO energy levels of the polymers were estimated using PYS in air. Polymer thin films were  
11 prepared on octadecyltrimethoxysilane (OTMS)-modified SiO<sub>2</sub> (300 nm)/Si substrates by spin-coating  
12 chloroform solutions of the polymers (4–6 mg mL<sup>-1</sup>), following the same procedure used for OFET device  
13 fabrication. The resulting films were thermally annealed at the optimized temperatures for each polymer  
14 prior to measurement. PYS measurements were carried out by irradiating the polymer films with ultraviolet  
15 light in the photon energy range from 4.20 to 6.20 eV with an energy step of 0.10 eV. The acquisition time  
16 at each photon energy was set to 10 s, and the UV light intensity was controlled in the range of 10–200 nW.  
17 The photoelectron yield was plotted as a function of photon energy, and the onset energy for photoemission  
18 was determined from the intersection of the baseline and the linear regression line fitted to the rising edge  
19 of the yield curve. The HOMO energy levels were estimated by subtracting this onset energy from the  
20 vacuum level.

### 22 Cyclic Voltammetry (CV)

23 Electrochemical measurements were performed in acetonitrile (MeCN) containing 0.1 M  
24 tetrabutylammonium perchlorate (*n*-Bu<sub>4</sub>NClO<sub>4</sub>) as the supporting electrolyte. A glassy carbon disk electrode  
25 (diameter: 3 mm) was used as the working electrode, a platinum wire as the counter electrode, and an  
26 Ag/AgCl electrode as the reference electrode. Prior to measurements, the electrolyte solution was degassed  
27 by bubbling argon gas for at least 15 min, and the absence of oxygen-related redox peaks was confirmed.  
28 Polymer films were prepared by drop-casting two drops of a chloroform solution of the polymer (1 mg mL<sup>-1</sup>)  
29 onto the working electrode using a Pasteur pipette, followed by drying at room temperature and under a  
30 gentle stream of warm air. All electrochemical measurements were conducted at room temperature (ca.  
31 25 °C). CV measurements were carried out at a scan rate of 100 mV s<sup>-1</sup>. For reduction measurements, the  
32 potential was initially scanned from 0.1 V to –2.0 V and then reversed. For oxidation measurements, a freshly  
33 prepared polymer film was used, and the potential was scanned from –0.1 V to 2.0 V and then reversed.  
34 Ferrocene (Fc) was measured as an external standard using a 0.01 M solution in acetonitrile containing 0.1  
35 M *n*-Bu<sub>4</sub>NClO<sub>4</sub> as the supporting electrolyte under the same electrochemical conditions as those used for the  
36 polymer measurements. The potential was scanned from 0 V toward the positive direction up to 1.0 V, then  
37 reversed to –1.0 V, and finally returned to 0 V at a scan rate of 100 mV s<sup>-1</sup>. The onset oxidation and reduction  
38 potentials were determined from the intersection of the tangent at the rising edge of the redox current with

1 the baseline. The HOMO and LUMO energy levels were electrochemically estimated from the onset  
2 oxidation and reduction potentials obtained by cyclic voltammetry according to the following equations:

$$3 \quad E_{\text{HOMO}}^{\text{CV}} = -(E_{\text{ox,onset}} - E_{\text{Fc/Fc}^+} + 4.80) \text{ eV}$$

$$4 \quad E_{\text{LUMO}}^{\text{CV}} = -(E_{\text{red,onset}} - E_{\text{Fc/Fc}^+} + 4.80) \text{ eV}$$

### 6 **Fabrication and Characterization of Organic Field-Effect Transistors**

7 Top-contact bottom-gate (TC/BG) OFETs were fabricated on a heavily n-doped Si wafer (N<sup>++</sup>-Si)  
8 with a thermally grown 300 nm-thick SiO<sub>2</sub> layer ( $C_i \approx 11.2 \text{ nF cm}^{-2}$ ); the substrates had a typical size of  
9 ca. 1.3 cm × 1.3 cm. First, the substrates were sequentially sonicated for 10 min in 50 mL of each solvent,  
10 in the order of deionized water, acetone (EL grade), and isopropanol (EL grade), and then dried by blowing  
11 nitrogen gas. They were then heated to 120 °C for 10 min to remove residual solvents while being covered  
12 with a lid to prevent contamination, and subsequently cooled to room temperature in air. The wafers were  
13 then treated with UV-ozone for 20 min. The SiO<sub>2</sub> surface was modified with a self-assembled monolayer  
14 (SAM) of OTMS under ambient conditions following a reported procedure.<sup>S4</sup> A syringe-filtered OTMS  
15 solution (7.5 μL of OTMS in 5 mL of toluene, filtered through a 0.45 μm membrane filter) was cast (100  
16 μL) onto the UV-ozone-treated substrates. The substrates were kept stationary at 0 rpm for 20 s to allow  
17 the OTMS molecules to self-assemble on the surface, followed by spin-coating at 3000 rpm for 40 s. After  
18 spin coating, the substrates were placed in a sealed chamber filled with ammonia vapor, which was  
19 generated by evacuating the chamber for several seconds in the presence of aqueous ammonia. The  
20 substrates were exposed to ammonia vapor under static conditions for at least 12 h. Subsequently, the  
21 substrates were removed from the chamber and sequentially sonicated in the order of deionized water  
22 followed by toluene, using approximately 50 mL of each solvent for 5 min per solvent. The successful  
23 formation of the OTMS SAM was confirmed by the hydrophobic nature of the treated surface.

24 **P1–P6** were dissolved in anhydrous chloroform (containing amylenes as a stabilizer, ≥ 99%) at a  
25 concentration of 4–6 mg mL<sup>-1</sup>. The polymer solutions were stirred at 40 °C and 400 rpm for at least 12 h  
26 in a nitrogen-filled glovebox. After cooling to room temperature, solutions were subsequently filtered  
27 through a 0.45 μm syringe filter prior to use. For each substrate, 90 μL of the filtered polymer solution  
28 was dispensed, followed by spin-coating at 3000 rpm for 40 s in a glovebox. The resulting films were  
29 thermally annealed (as-cast, 100 °C, 200 °C, or 300 °C) for 15 min under a nitrogen atmosphere in the  
30 same glovebox.

31 After spin coating and thermal annealing, the substrates were removed from the glovebox, and gold  
32 (Au) source and drain electrodes were deposited by thermal evaporation under vacuum through a shadow  
33 mask. The shadow mask, defining a channel length ( $L$ ) of 100 μm and a channel width ( $W$ ) of 1 mm, was  
34 fixed onto the substrates using polyimide tape. For **P6**-based OFET devices, Au source/drain electrodes  
35 with channel lengths ( $L$ ) ranging from 50 to 200 μm and a channel width ( $W$ ) of 1 mm were additionally  
36 fabricated to investigate parasitic effects using the transfer line method (TLM). The substrates were placed  
37 upside down in the evaporation chamber facing the Au source. Prior to deposition, the chamber was  
38 evacuated to a base pressure below  $3.0 \times 10^{-3} \text{ Pa}$ . Au (~50 nm) was thermally evaporated using a resistive

1 heating source by gradually increasing the current to 70–80 A. The deposition rate was maintained at  
 2 approximately  $0.05 \text{ nm s}^{-1}$ , as monitored by a thickness monitor. After reaching the target thickness, the  
 3 Au source was shielded, and the current was reduced to zero. After cooling to room temperature, the  
 4 devices were removed from the vacuum chamber and used for measurements. The OFET measurements  
 5 were performed under different environments depending on the carrier type. p-Type characteristics were  
 6 measured in air for all devices. For the ambipolar polymer **P6**, both p- and n-type characteristics were  
 7 additionally measured under vacuum ( $< 2.0 \times 10^{-2} \text{ Pa}$ ) on a probe stage, enabling direct comparison under  
 8 identical conditions. Saturation mobilities were calculated according to the following equation:

$$9 \quad \sqrt{I_D} = \sqrt{\frac{WC_i\mu}{2L}} (V_G - V_{th})$$

10 where  $\mu$  is the field-effect mobility in the saturation regime;  $W$  and  $L$  are the channel width and length,  
 11 respectively;  $C_i$  is the areal capacitance of the gate dielectric;  $I_D$  is the drain current;  $V_G$  is the gate voltage;  
 12 and  $V_{th}$  is the threshold voltage.

### 14 **Two-Dimensional Grazing-Incidence Wide-Angle X-Ray Scattering (GIWAXS) Measurements**

15 GIWAXS measurements were performed at the BL23A beamline of the National Synchrotron Radiation  
 16 Research Center. Polymer solutions were spin-coated onto OTMS-modified  $\text{SiO}_2$  (300 nm)/Si substrates  
 17 under the same conditions as those used for OFET device fabrication. The X-ray wavelength was  $1.2398 \text{ \AA}$ ,  
 18 and the incident angle was fixed at  $0.15^\circ$ .

19 Two-dimensional (2D) scattering patterns were collected and converted into one-dimensional (1D) line-  
 20 cut profiles along the out-of-plane ( $q_z$ ) and in-plane ( $q_{xy}$ ) directions using the GIXS Analysis software.<sup>S5</sup> The  
 21 lamellar (h00) diffraction peaks were analyzed to extract the d-spacing and crystal coherence length (CCL).  
 22 The diffraction peaks were fitted using Gaussian functions to determine the full width at half maximum  
 23 (FWHM).

24 Crystallographic parameters, d-spacing and CCL was estimated using the following equations:<sup>S6</sup>

$$25 \quad d_{lamellar} = \frac{2\pi}{q_z}$$

$$26 \quad \text{CCL} = 2\pi K / \text{FWHM}$$

27 where  $q_z$  is the out-of-plane position vector and  $K$  is the shape factor (0.90).

### 29 **Atomic Force Microscopy (AFM) Measurements**

30 AFM measurements were performed using a Seiko Instruments SPA300 system operated in dynamic  
 31 force microscopy (DFM, tapping) mode under ambient conditions. Silicon cantilevers (DF-20, Seiko  
 32 Instruments) with a resonance frequency of approximately 124 kHz and a spring constant of  $16 \text{ N m}^{-1}$   
 33 (nominal values), coated with Al, were employed. Height images were acquired over a scan area of  $2 \mu\text{m} \times$   
 34  $2 \mu\text{m}$ . Polymer thin films were prepared by spin-coating polymer solutions onto OTMS-modified  $\text{SiO}_2$  (300  
 35 nm)/Si substrates under the same conditions as those used for OFET device fabrication. The obtained AFM

1 images were processed as necessary by first-order plane correction, flattening, and fast Fourier transform  
2 (FFT) analysis using standard image processing procedures.

3

## 4 2.1. Synthesis

### 5 Synthesis of Qx-4

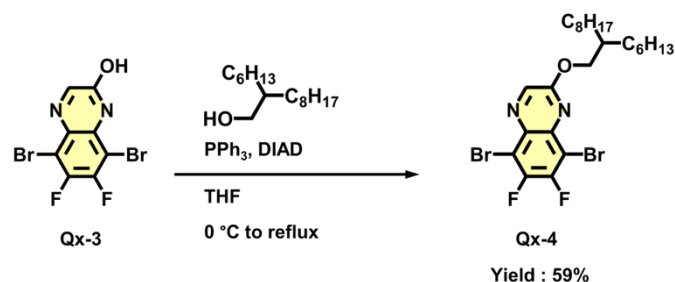

7 **Qx-3** (661.9 mg, 1.95 mmol) and triphenylphosphine (111.8 mg, 2.17 mmol) were added to a 300 mL  
8 two-necked flask. The atmosphere in the flask was replaced with Ar. Anhydrous THF (63.0 mL) was added  
9 to the flask. The reaction mixture was cooled to ca. 0 °C using an ice bath. Then, 2-hexyldecyl-1-ol (0.650  
10 mL, 2.25 mmol) was added dropwise to the solution over 1 min, followed by the dropwise addition of  
11 diisopropyl azodicarboxylate (40% in toluene) (1.60 mL, 2.98 mmol) over 16 min under cooling. The  
12 reaction mixture was subsequently allowed to warm naturally to room temperature. After stirring for 1.5  
13 h, the reaction mixture was heated to reflux and stirred for an additional 19 h. The mixture was then cooled  
14 to room temperature, and the solvent was removed under reduced pressure. The resulting residue was  
15 dissolved in a minimal amount of dichloromethane, after which approximately 4 g of dry silica gel was  
16 added. The solvent was removed under reduced pressure to afford a free-flowing powder, which was  
17 purified by flash silica-gel column chromatography. Elution was performed using  
18 hexane/dichloromethane (98/2, v/v) for 1 column volume (CV), followed by a gradient from 98/2 to 90/10  
19 (v/v) over 10 CV at a flow rate of 20 mL min<sup>-1</sup> to afford **Qx-4** (654.8 mg, 1.16 mmol, 59%) as a pale  
20 yellow liquid. The chemical shifts of the <sup>1</sup>H NMR spectrum agreed with values reported in the literature.<sup>S3</sup>  
21 Spectral data for **Qx-4**: <sup>1</sup>H NMR (400 MHz, CDCl<sub>3</sub>): δ = 8.52 (s, 1H), 4.49 (d, *J* = 5.7 Hz, 2H), 1.89 (m,  
22 1H), 1.14–1.46 (m, 24H), 0.84–0.94 (m, 6H) ppm.

23

1 Synthesis of Qx-5

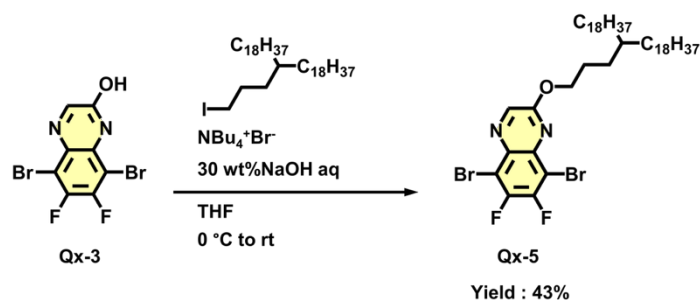

2  
 3 **Qx-3** (200.3 mg, 0.589 mmol), tetrabutylammonium bromide (111.8 mg, 0.347 mmol), and 19-(3-  
 4 iodopropyl)heptatriacontane (1.230 g, 1.78 mmol) were added to a 100 mL two-necked flask. The  
 5 atmosphere in the flask was replaced with Ar. THF (8.0 mL) was added to the flask. The reaction mixture  
 6 was cooled to ca. 0 °C using an ice bath. Then, 30 wt% NaOH aq. was dropwise added to the solution  
 7 over a period of 7 min under cooling. The reaction mixture was allowed to warm up to room temperature  
 8 without removing the cooling bath. After being stirred for 2 days, the reaction mixture was quenched by  
 9 the slow addition of 3 M HCl aq. (100 mL). The mixture was extracted with ethyl acetate (ca. 50 mL × 3).  
 10 The combined organic layers were washed with H<sub>2</sub>O and brine, and dried over anhydrous MgSO<sub>4</sub>. The  
 11 mixture was filtered, and the filtrate was evaporated. The residue was purified by flash silica-gel column  
 12 chromatography using hexane/dichloromethane (98/2, v/v) for 1 CV, followed by a gradient elution from  
 13 hexane/dichloromethane = 98/2 to 80/20 (v/v) over 10 CV at a flow rate of 80 mL min<sup>-1</sup> to afford **Qx-5**  
 14 (231.5 mg, 0.257 mmol, 43%) as a white solid. Spectral data for **Qx-5**: <sup>1</sup>H NMR (400 MHz, CDCl<sub>3</sub>): δ =  
 15 8.51 (s, 1H), 4.55 (t, *J* = 6.8 Hz, 2H), 1.93–1.80 (m, 2H), 1.46–1.21 (m, 71H), 0.88 (t, *J* = 6.8 Hz, 6H)  
 16 ppm, assigned based on the <sup>1</sup>H-<sup>1</sup>H COSY spectra. <sup>13</sup>C NMR (100 MHz, CDCl<sub>3</sub>): δ = 158.49 (d, *J*<sub>CF</sub> = 2.4  
 17 Hz), 150.70 (dd, *J*<sub>CF</sub> = 243, 17.2 Hz), 148.18 (dd, *J*<sub>CF</sub> = 240, 17.1 Hz), 140.62 (d, *J*<sub>CF</sub> = 3.6 Hz), 136.30 (d,  
 18 *J*<sub>CF</sub> = 4.3 Hz), 133.24 (d, *J*<sub>CF</sub> = 3.8 Hz), 109.76 (dd, *J*<sub>CF</sub> = 18.4, 2.4 Hz), 107.64 (dd, *J*<sub>CF</sub> = 17.8, 1.8 Hz),  
 19 68.36, 37.12, 33.53, 31.95, 30.13, 29.73, 29.68, 29.39, 26.67, 25.63, 22.72, 14.15 ppm, assigned based on  
 20 the DEPT-135, g-HSQC and g-HMBC spectra. The peak assignments are noted on the NMR spectra on  
 21 pages S34–39. <sup>19</sup>F NMR (376 MHz, CDCl<sub>3</sub>): δ = -118.5 (d, *J*<sub>FF</sub> = 24.4 Hz), -123.7 (d, *J*<sub>FF</sub> = 24.4 Hz) ppm.  
 22 MS (MALDI-TOF) *m/z* = 900.105. FT-IR (ATR) 3058, 2915, 2850, 1881, 1733, 1575, 1470, 1411, 1302,  
 23 1226, 1043, 938, 847, 723, 639, 572, 519, 462 cm<sup>-1</sup>.

24

# 1 Synthesis of Polymer **P1**

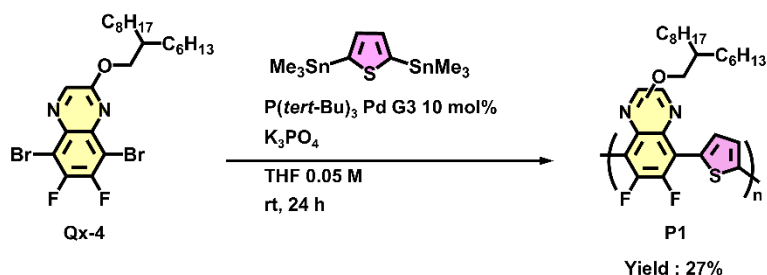

2  
3 **Qx-4** (193.4 mg, 0.343 mmol), 2,5-bis(trimethylstannyl)thiophene (140.8 mg, 0.344 mmol), K<sub>3</sub>PO<sub>4</sub>  
4 (182.8 mg, 0.861 mmol), and P(*tert*-Bu)<sub>3</sub> Pd G3 (19.9 mg, 0.0348 mmol) were added to a 30 mL two-  
5 necked flask, which was dried by heating under a reduced pressure in advance. The atmosphere in the  
6 flask was replaced with Ar. THF (7.0 mL) was added to the flask. Then, the reaction mixture was stirred  
7 at room temperature. The photographs show the color change of the polymerization mixture during the  
8 synthesis of **P1**. After being stirred for 24 h, diethylammonium diethyldithiocarbamate (152.4 mg, 0.685  
9 mmol) and chloroform (8.0 mL) were added to the reaction mixture, and the resulting mixture was stirred  
10 at room temperature for an additional 1.5 h. Subsequently, the reaction mixture was poured into methanol  
11 (200 mL). The precipitate was collected by filtration and purified with Soxhlet extraction using methanol,  
12 acetone, hexane, and dichloromethane. The dichloromethane soluble fraction was concentrated and  
13 reprecipitated into methanol, yielding **P1** (45.7 mg, 0.0939 mmol, 27%) as a black solid. The chemical  
14 structure of **P1** was confirmed by <sup>1</sup>H NMR, MALDI-TOF MS, and FT-IR (pages S39, S43, and S46).  
15 Spectral data for **P1**: FT-IR (ATR) 2923, 2855, 2728, 2673, 2620, 1578, 1462, 1404, 1313, 1264, 1213,  
16 1092, 1024, 961, 897, 862, 802, 740, 662, 629 cm<sup>-1</sup>.

17

## 18 Polymerization behavior of **P1**

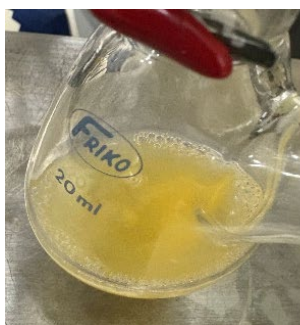

19 At the start of polymerization  
pale yellow

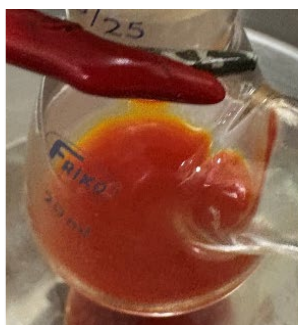

After 6 min  
orange

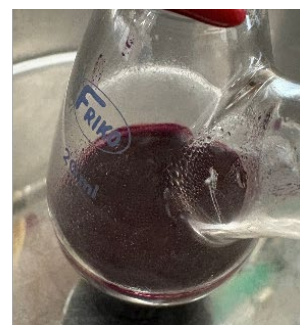

After 13 h  
reddish purple

20

# 1 Synthesis of Polymer P2

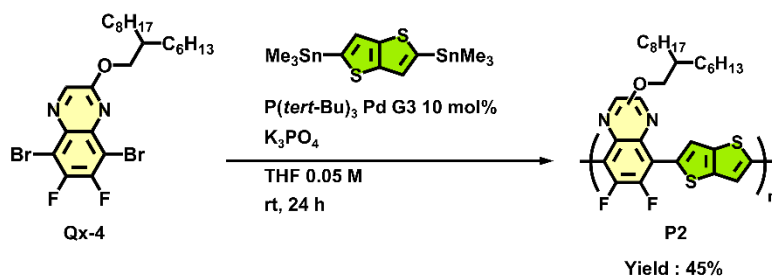

2  
3 **Qx-4** (223.2 mg, 0.395 mmol), 2,5-bis(trimethylstannyl)thieno[3,2-*b*]thiophene (140.8 mg, 0.396 mmol),  
4  $K_3PO_4$  (209.7 mg, 0.988 mmol), and  $P(tert-Bu)_3 Pd$  G3 (23.0 mg, 0.0402 mmol) were added to a 30 mL two-  
5 necked flask, which was dried by heating under a reduced pressure in advance. The subsequent  
6 polymerization and purification procedures were carried out following the same protocol as that used for **P1**.  
7 The photographs show the color change of the polymerization mixture during the synthesis of **P2**. After  
8 Soxhlet extraction, the fraction obtained with chloroform following dichloromethane extraction was  
9 collected to afford **P2** (97.2 mg, 0.179 mmol, 45%) as black solids. The chemical structure of **P2** was  
10 confirmed by  $^1H$  NMR, MALDI-TOF MS, and FT-IR (pages S40, S43, and S46). Spectral data for **P2**: FT-  
11 IR (ATR) 3136, 3072, 2919, 2854, 2636, 1740, 1641, 1577, 1463, 1404, 1312, 1259, 1211, 1155, 1056, 999,  
12 958, 904, 822, 769, 719, 664  $cm^{-1}$ .

13

## 14 Polymerization behavior of **P2**

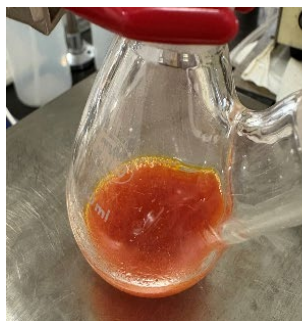

After 6 min  
orange

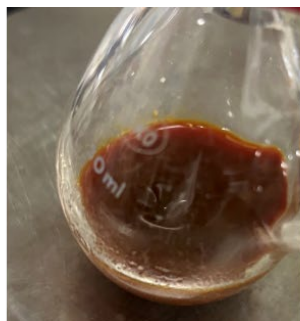

After 2 min  
reddish brown

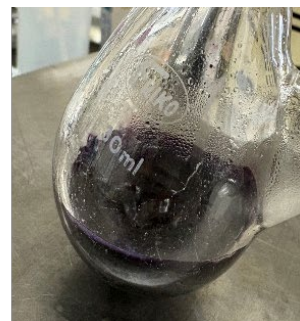

After 35 min  
bluish purple

16

# 1 Synthesis of Polymer P3

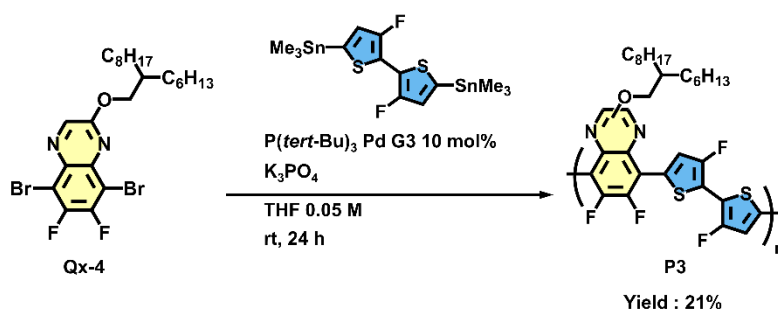

2  
3 **Qx-4** (136.9 mg, 0.243 mmol), (3,3'-difluoro-[2,2'-bithiophene]-5,5'-diyl)bis(trimethylstannane) (128.1  
4 mg, 0.243 mmol),  $K_3PO_4$  (129.3 mg, 0.609 mmol), and  $P(tert-Bu)_3 Pd G3$  (14.2 mg, 0.0248 mmol) were  
5 added to a 20 mL two-necked flask, which was dried by heating under a reduced pressure in advance. The  
6 subsequent polymerization and purification procedures were carried out following the same protocol as that  
7 used for **P1**. The photographs show the color change of the polymerization mixture during the synthesis of  
8 **P3**. After Soxhlet extraction, the fraction obtained with chloroform following dichloromethane extraction  
9 was collected to afford **P3** (31.2 mg, 0.0516 mmol, 21%) as black solids. The chemical structure of **P3** was  
10 confirmed by  $^1H$  NMR, MALDI-TOF MS, and FT-IR (pages S40, S44, and S46). Spectral data for **P3**: FT-  
11 IR (ATR) 2968, 2902, 1631, 1574, 1517, 1469, 1417, 1369, 1313, 1270, 1207, 1141, 1071, 1011, 923, 823,  
12 751, 726  $cm^{-1}$ .

13

## 14 Polymerization behavior of P3

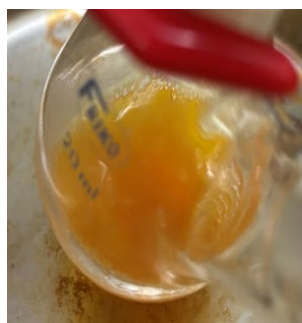

After 1 min  
orange

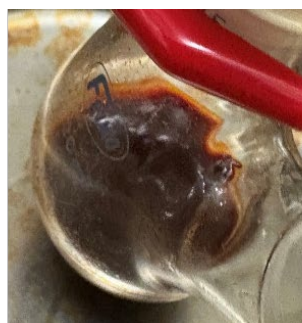

After 8 min  
reddish brown

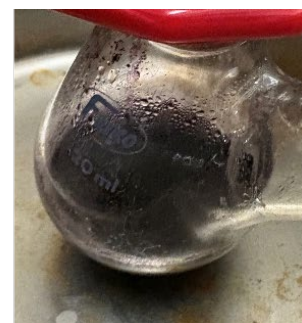

After 10 h 30 min  
bluish purple

16

# 1 Synthesis of Polymer P4

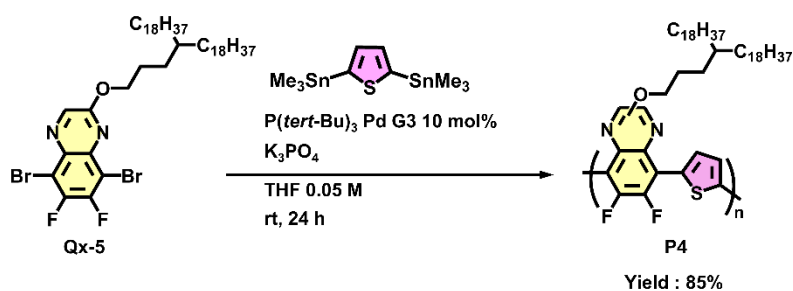

2  
3 **Qx-5** (100.2 mg, 0.111 mmol), 2,5-bis(trimethylstannyl)thiophene (46.0 mg, 0.112 mmol),  $K_3PO_4$   
4 (59.8 mg, 0.282 mmol), and  $P(tert-Bu)_3 Pd G3$  (19.9 mg, 0.0126 mmol) were added to a 20 mL two-  
5 necked flask, which was dried by heating under a reduced pressure in advance. The subsequent  
6 polymerization and purification procedures were carried out following the same protocol as that used for  
7 **P1**. The photographs show the color change of the polymerization mixture during the synthesis of **P4**.  
8 After Soxhlet extraction with methanol followed by acetone, the hexane-extracted fraction was collected  
9 to afford **P4** (77.9 mg, 0.0946 mmol, 85%) as a black solid. The chemical structure of **P4** was confirmed  
10 by  $^1H$  NMR, MALDI-TOF MS, and FT-IR (pages S41, S44, and S46). Spectral data for **P4**: FT-IR (ATR)  
11 2918, 2852, 1580, 1523, 1467, 1419, 1367, 1319, 1263, 1220, 1157, 1091, 1021, 960, 873, 773, 701, 675  
12  $cm^{-1}$ .

## 14 Polymerization behavior of P4

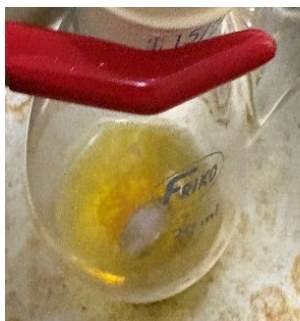

15 At the start of polymerization  
yellow

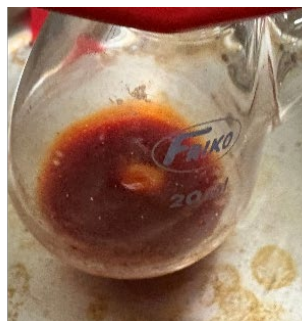

After 4 min  
reddish brown

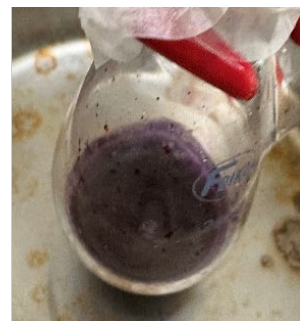

After 24 h  
bluish purple

16

# 1 Synthesis of Polymer **P5**

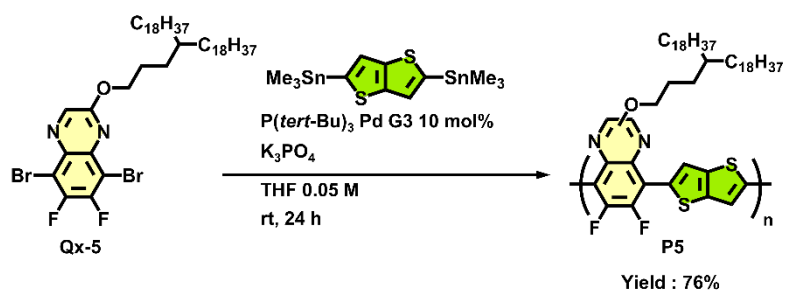

2  
3 **Qx-5** (150.0 mg, 0.166 mmol), 2,5-bis(trimethylstannyl)thieno[3,2-*b*]thiophene (77.6 mg, 0.166 mmol),  
4  $K_3PO_4$  (88.4 mg, 0.417 mmol), and  $P(tert-Bu)_3 Pd G3$  (9.59 mg, 0.0168 mmol) were added to a 20 mL two-  
5 necked flask, which was dried by heating under a reduced pressure in advance. The subsequent  
6 polymerization and purification procedures were carried out following the same protocol as that used for **P1**.  
7 The photographs show the color change of the polymerization mixture during the synthesis of **P5**. After  
8 Soxhlet extraction with methanol followed by acetone, the hexane-extracted fraction was collected to afford  
9 **P5** (112 mg, 0.127 mmol, 76%) as a black solid. The chemical structure of **P5** was confirmed by  $^1H$  NMR,  
10 MALDI-TOF MS, and FT-IR (pages S41, S45, and S46). Spectral data for **P5**: FT-IR (ATR) 2918, 2851,  
11 2669, 1638, 1580, 1466, 1408, 1317, 1257, 1211, 1080, 1034, 969, 903, 813, 721, 663, 622  $cm^{-1}$ .

12  
13 Polymerization behavior of **P5**

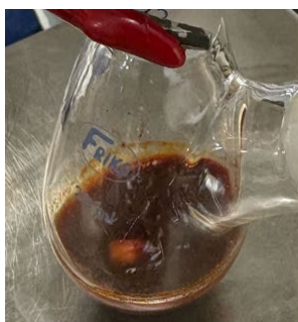

14 After 6 min  
reddish brown

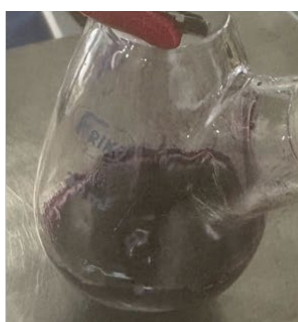

After 15 min  
reddish purple

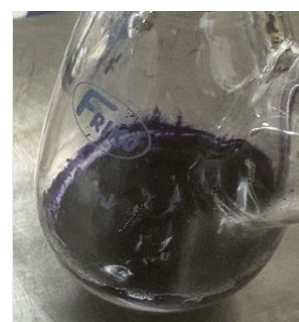

After 1 h 15 min  
bluish purple

15

# 1 Synthesis of Polymer P6

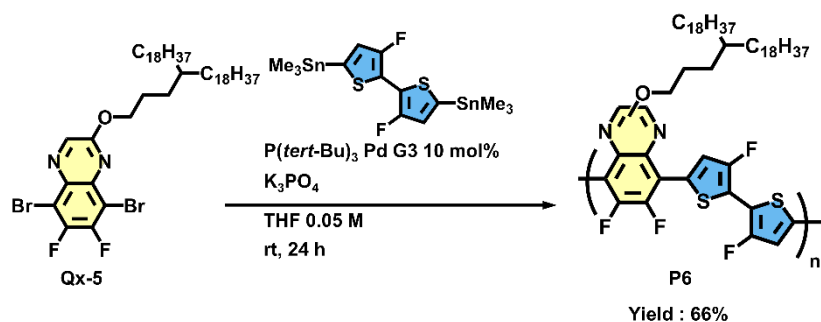

2

3 **Qx-5** (150.1 mg, 0.166 mmol), (3,3'-difluoro-[2,2'-bithiophene]-5,5'-diyl)bis(trimethylstannane) (87.9 mg,  
4 0.167 mmol),  $K_3PO_4$  (89.2 mg, 0.420 mmol), and  $P(tert-Bu)_3 Pd G3$  (9.77 mg, 0.0171 mmol) were added to  
5 a 20 mL two-necked flask, which was dried by heating under a reduced pressure in advance. The subsequent  
6 polymerization and purification procedures were carried out following the same protocol as that used for **P1**.  
7 The photographs show the color change of the polymerization mixture during the synthesis of **P6**. After  
8 Soxhlet extraction with methanol followed by acetone, the hexane-extracted fraction was collected to afford  
9 **P6** (104 mg, 0.110 mmol, 66%) as a black solid. The chemical structure of **P6** was confirmed by  $^1H$  NMR,  
10 MALDI-TOF MS, and FT-IR (pages S42, S45, and S46). Spectral data for **P6**: FT-IR (ATR) 2917, 2851,  
11 1580, 1463, 1407, 1317, 1273, 1219, 1152, 1091, 1037, 959, 904, 856, 771, 677, 624  $cm^{-1}$ .

12

## 13 Polymerization behavior of P6

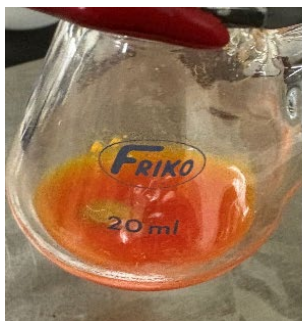

After 1 min  
orange

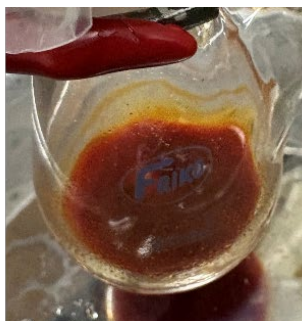

After 5 min  
reddish brown

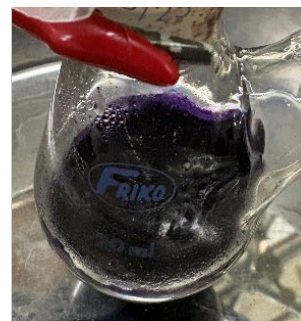

After 9 h 15 min  
bluish purple

15

1 **3. Fig. S1–S24**

2

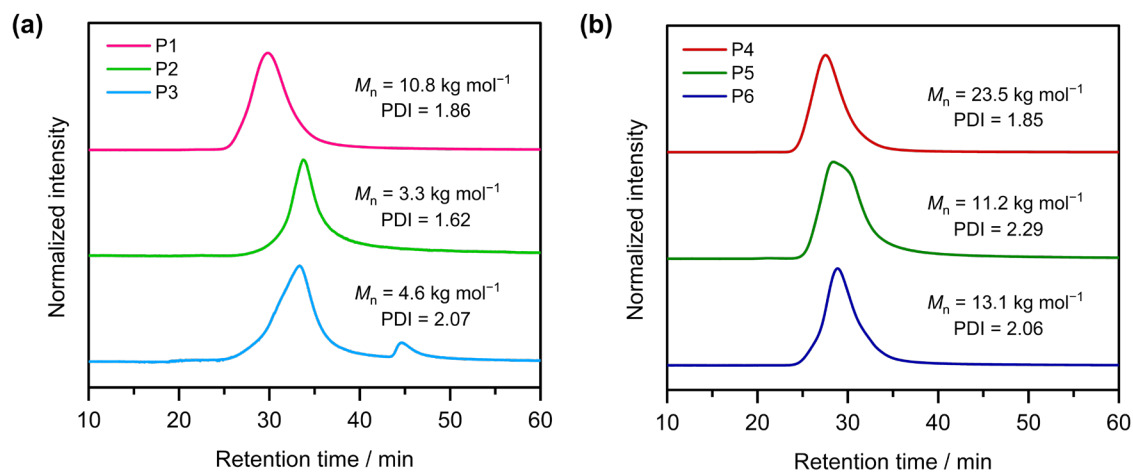

3

4 **Fig. S1** GPC traces of the synthesized polymers measured in *o*-DCB at 40 °C. (a) **P1–P3**. (b) **P4–P6**.

5

6

7

8

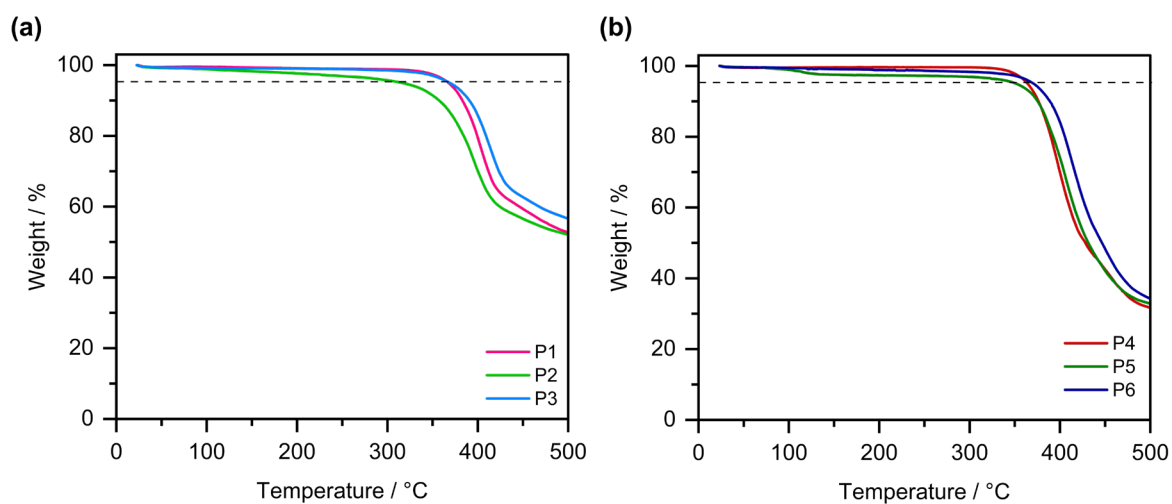

9

10 **Fig. S2** TGA curves of (a) **P1–P3** and (b) **P4–P6** recorded under nitrogen atmosphere at a rate of 10 °C  
11  $\text{min}^{-1}$ .

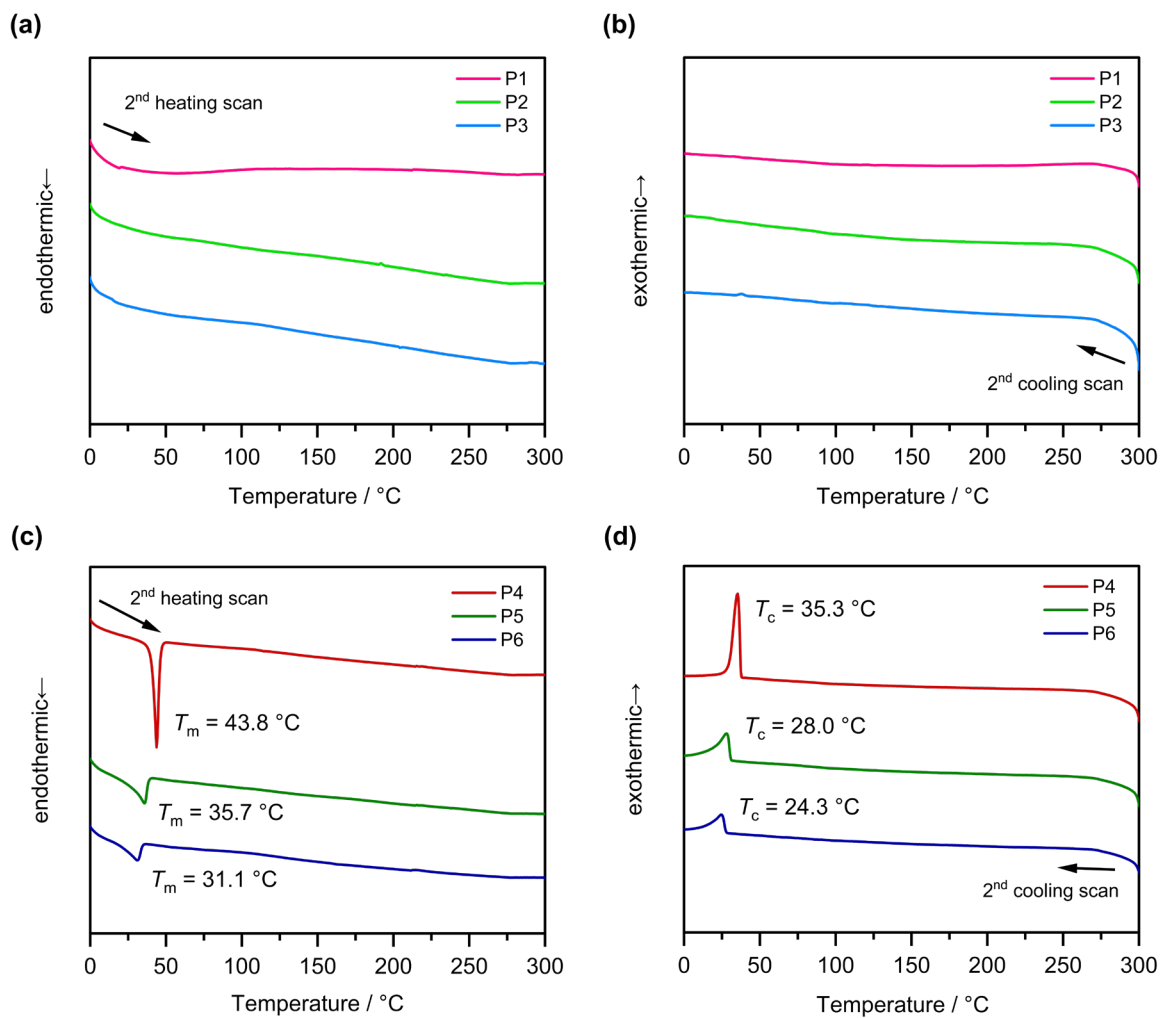

1  
2  
3  
4

**Fig. S3** DSC thermograms of **P1–P6** measured under nitrogen atmosphere at a rate of  $10\text{ °C min}^{-1}$ . Second (a) heating and (b) cooling scans of **P1–P3**. Second (c) heating and (d) cooling scans of **P4–P6**.

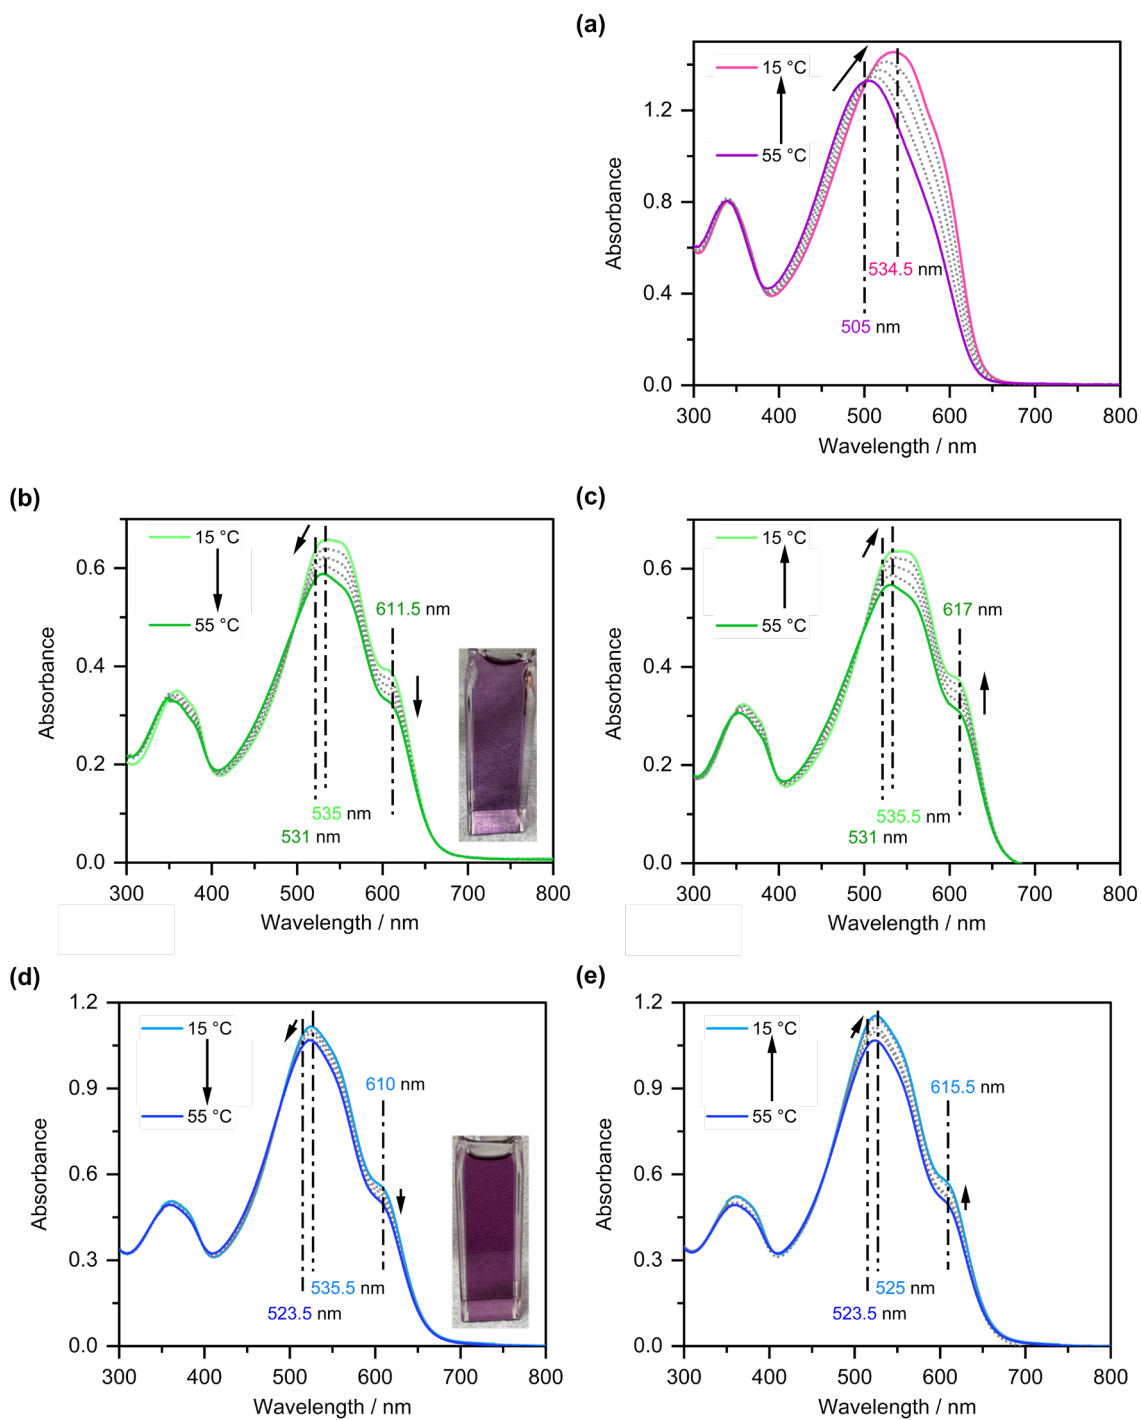

1  
2  
3  
4  
5

**Fig. S4** Temperature-dependent UV-vis absorption spectra of **P1–P3** dissolved in chloroform ( $c = \text{ca. } 1.0 \times 10^{-5} \text{ M}$ ): (a) cooling process of **P1**; (b) heating and (c) cooling processes of **P2**; (d) heating and (e) cooling processes of **P3**. All spectra were recorded between 15 and 55 °C at 10 °C intervals.

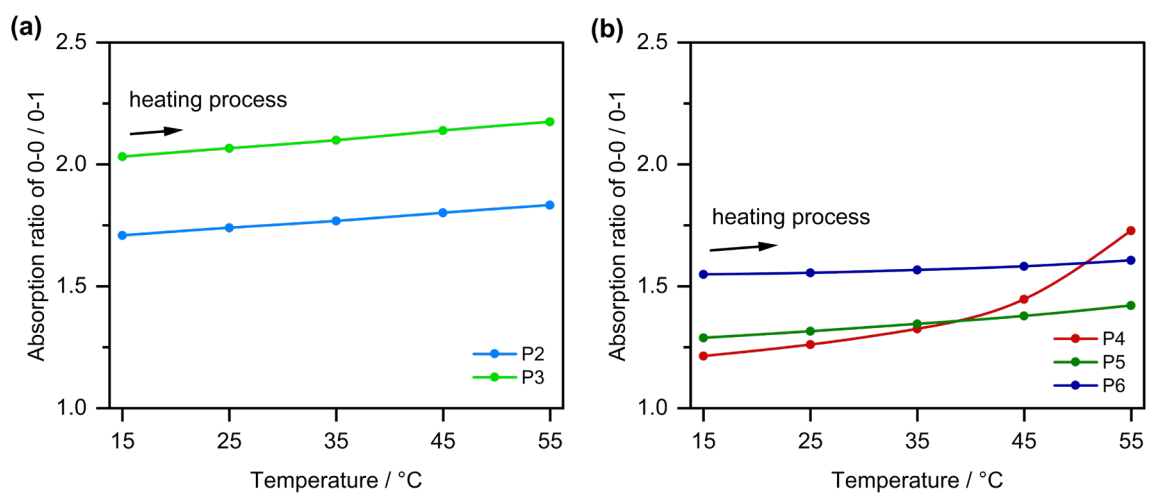

1  
2  
3  
4

**Fig. S5** Absorption ratios of 0-0/0-1 peaks of (a) **P2–P3** and (b) **P4–P6** dissolved in  $\text{CHCl}_3$  ( $c = \text{ca. } 1.0 \times 10^{-5} \text{ M}$ ) obtained by heating from 15 to 55 °C.

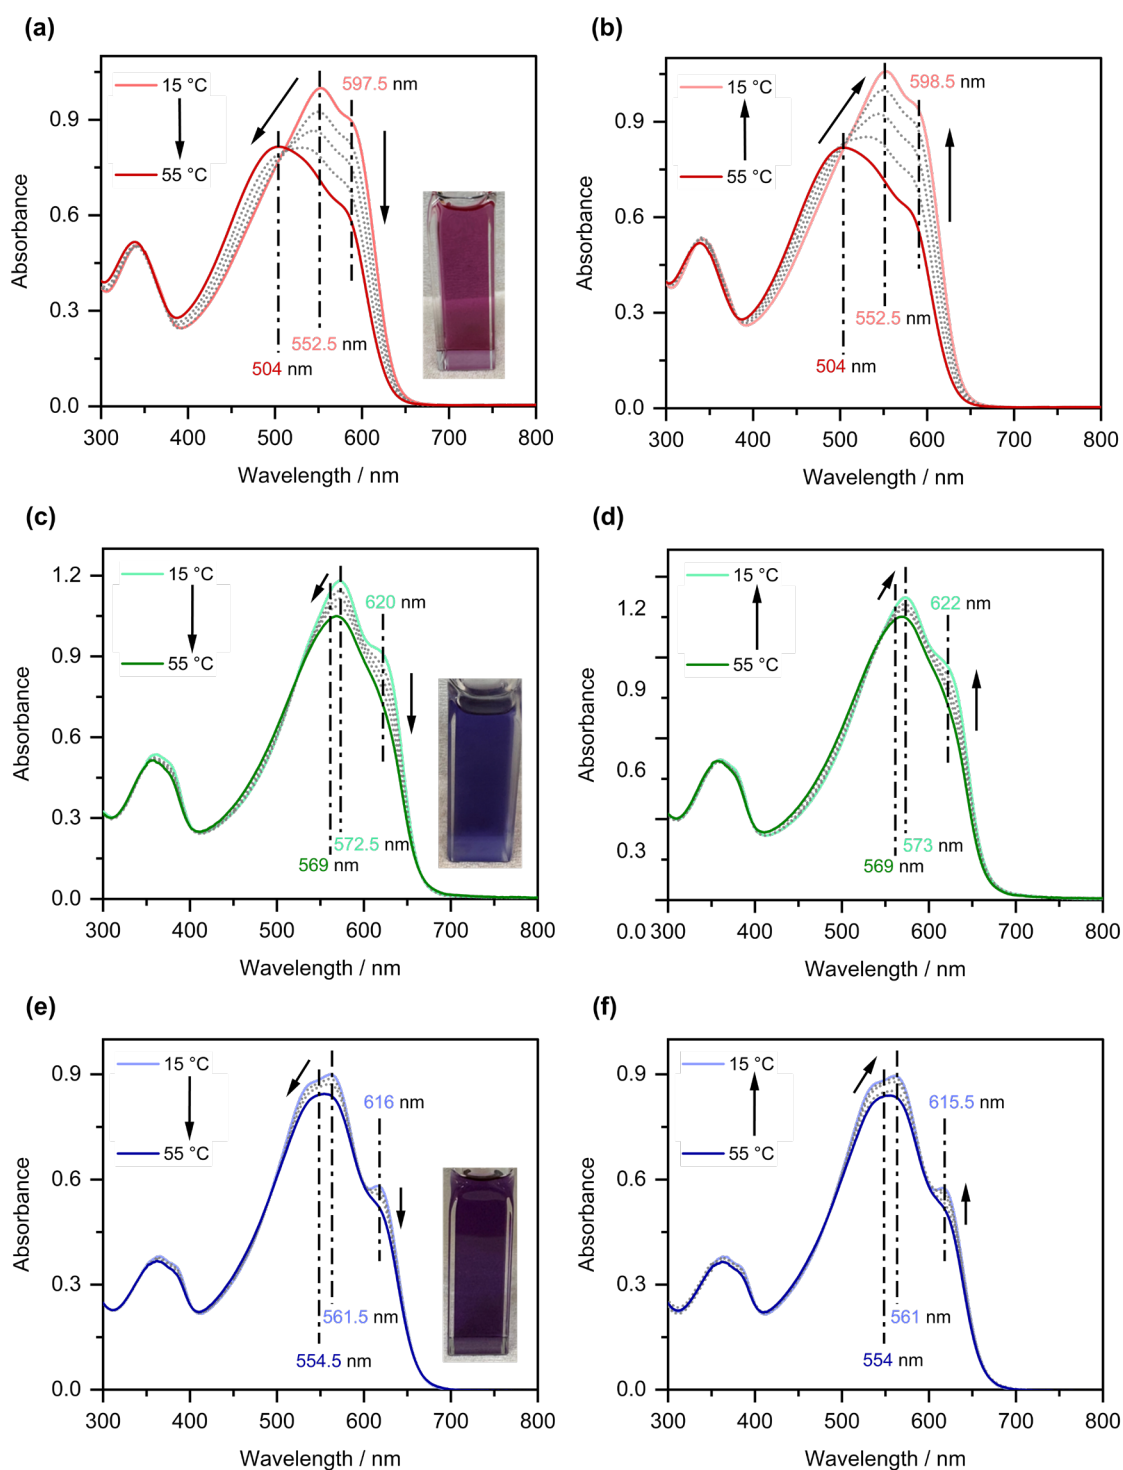

1  
 2 **Fig. S6** Temperature-dependent UV-vis absorption spectra of **P4–P6** dissolved in chloroform ( $c = \text{ca. } 1.0 \times$   
 3  $10^{-5} \text{ M}$ ): (a) heating and (b) cooling processes of **P4**; (c) heating and (d) cooling processes of **P5**; (d) heating  
 4 and (e) cooling processes of **P6**. All spectra were recorded between 15 and 55 °C at 10 °C intervals.

5

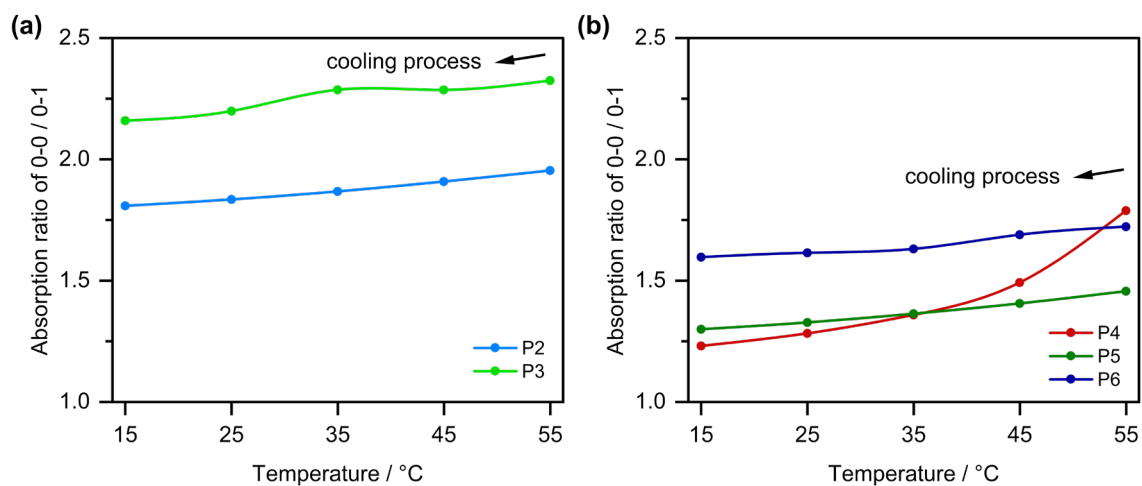

1  
2 **Fig. S7** Absorption ratios of 0-0/0-1 peaks of (a) **P2-P3** and (b) **P4-P6** dissolved in  $\text{CHCl}_3$  ( $c = 1.0 \times 10^{-5}$   
3 M) obtained by cooling from 55 to 15 °C.

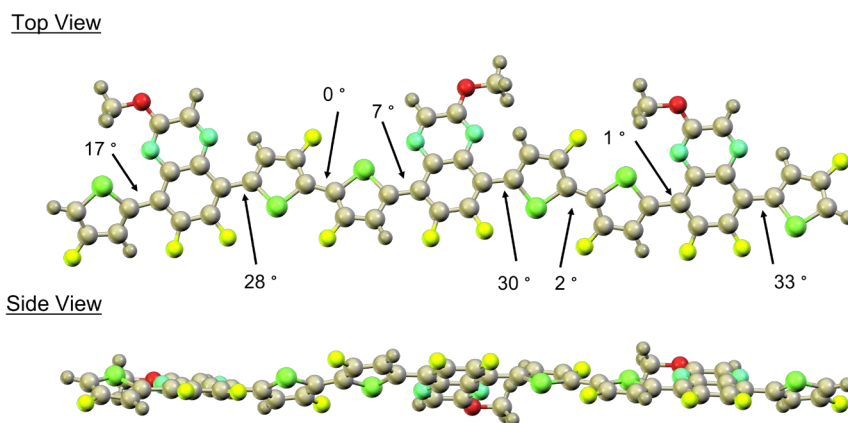

11  
12 **Fig. S8** Optimized geometries and conformational analysis of **P3** and **P6** models calculated at the  
13  $\omega\text{B97XD}/6\text{-}31\text{G}(\text{d},\text{p})$  level, where the alkyl side chains were replaced with methyl groups.

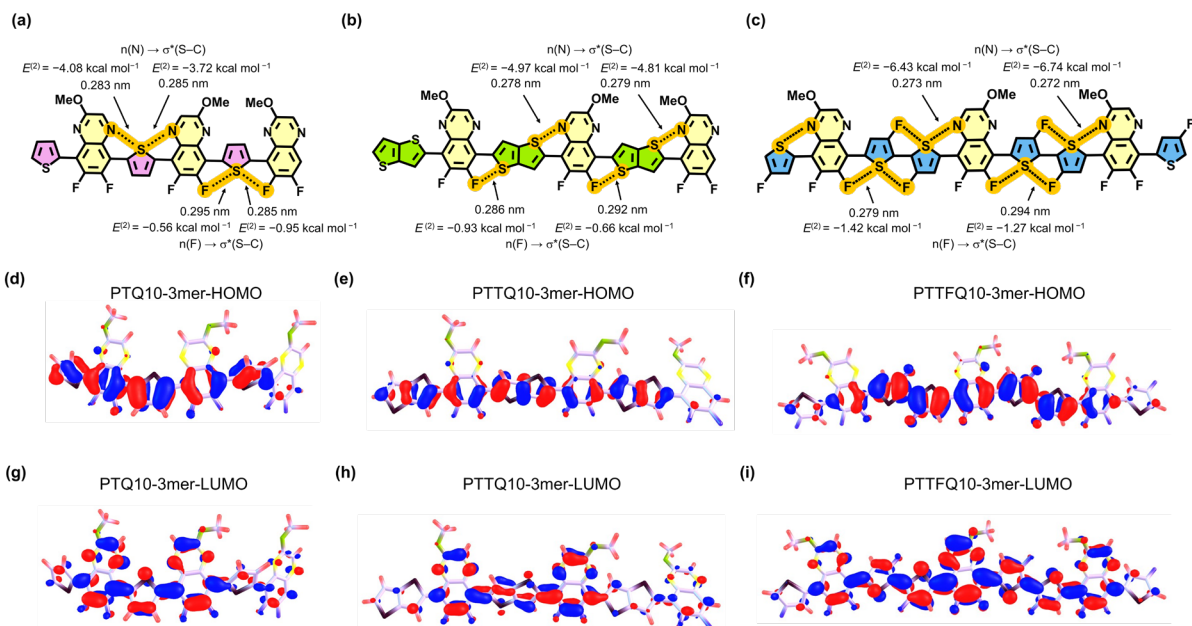

1  
2 **Fig. S9** Optimized molecular geometries, NBO analyses, and frontier molecular orbitals of (a,d,g) **P1** and  
3 **P4**, (b, e, h) **P2** and **P5**, and (c, f, i) **P3** and **P6** model compounds. (a–c) NBO analyses highlighting S–F and  
4 S–N noncovalent interactions, including the corresponding interatomic distances and second-order  
5 perturbation stabilization energies ( $E^{(2)}$ ). The HOMO (d–f) and LUMO (g–i) distributions along the  
6 conjugated backbone are shown. All calculations were performed at the  $\omega$ B97XD/6-31G(d,p) level of theory.

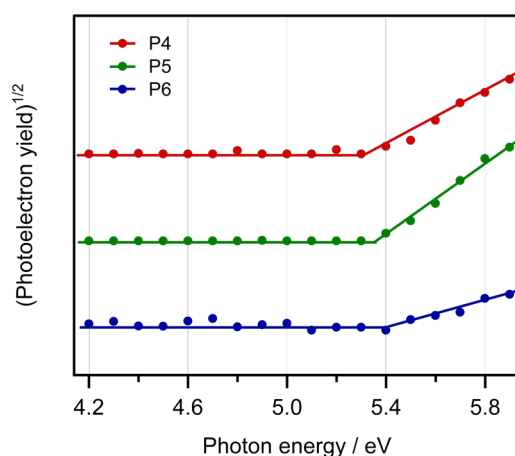

12  
13 **Fig. S10** Photoelectron yield spectroscopy (PYS) spectra of thin films of **P4**–**P6** prepared on OTMS-  
14 modified  $\text{SiO}_2$  (300 nm)/Si substrates. The HOMO levels were determined from the onset of photoelectron  
15 emission.

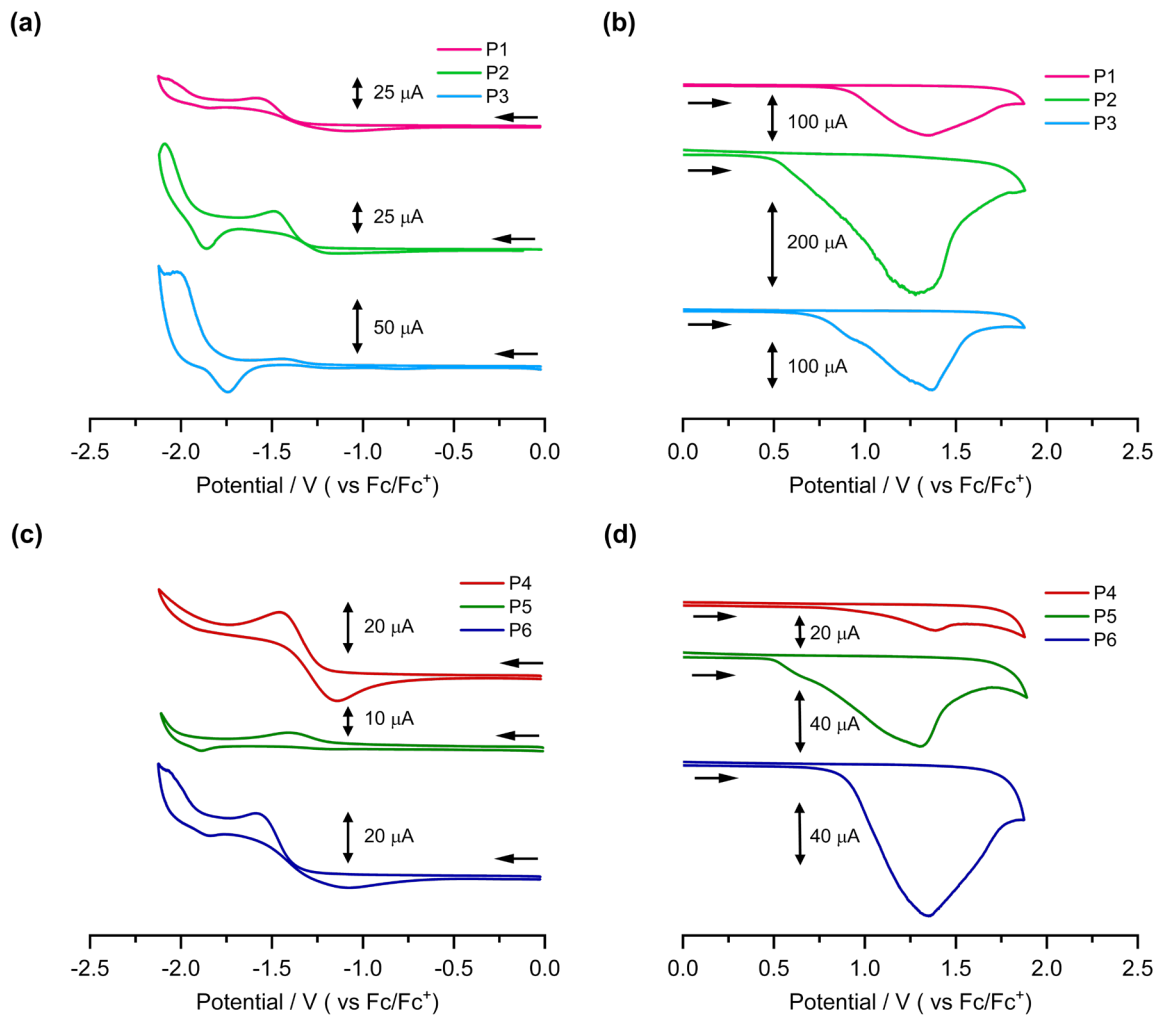

1  
2  
3  
4  
5  
6  
7  
8

**Fig. S11** Cyclic voltammograms of polymer thin films, measured in MeCN with 0.1 M *n*-Bu<sub>4</sub>NClO<sub>4</sub> at a scan rate of 100 mV s<sup>-1</sup>: (a) reduction of **P1–P3**, (b) oxidation of **P1–P3**, (c) reduction of **P4–P6**, and (d) oxidation of **P4–P6**.

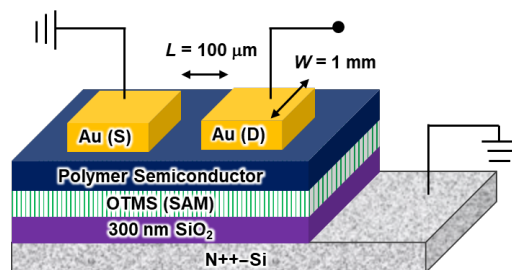

9  
10  
11

**Fig. S12** Schematic illustration of the top-contact/ bottom-gate (TC/BG) organic field-effect transistor (OFET) device architecture used in this study.

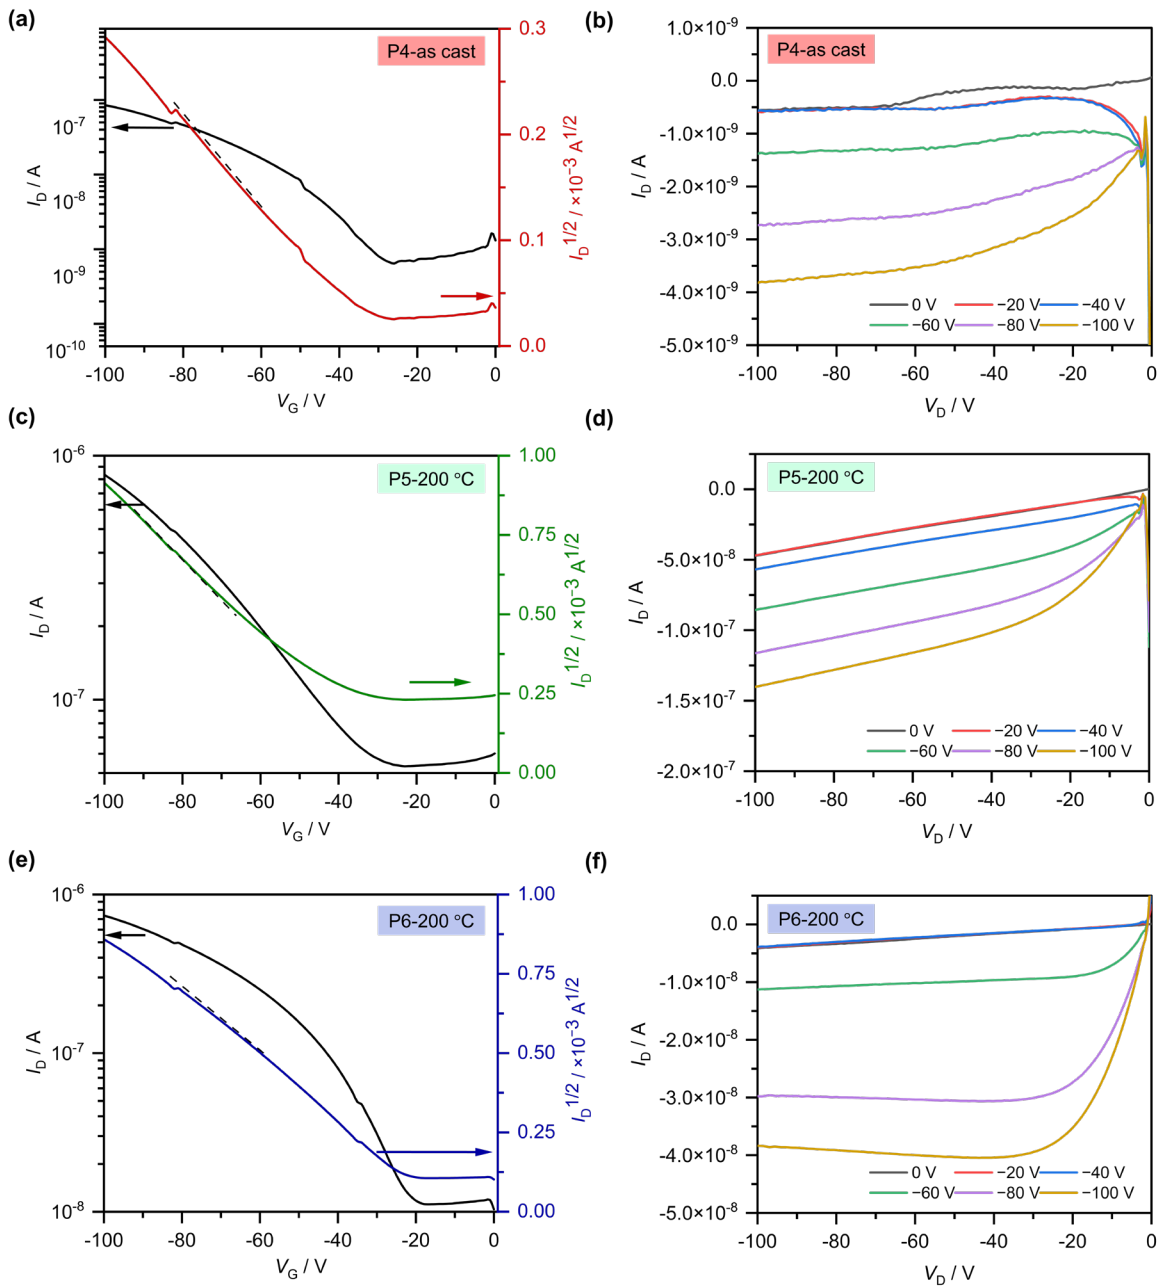

1  
2 **Fig. S13** Transfer curves of OFET devices based on (a) **P4** (as-cast), (c) **P5** after thermal annealing at 200 °C,  
3 and (e) **P6** after thermal annealing at 200 °C. Panels (a, c, e) show the transfer curves ( $V_D = -100$  V) measured  
4 in air, while panels (b, d, f) show the corresponding output curves. The drain current ( $I_D$ )–drain voltage ( $V_D$ )  
5 curves were measured at different gate voltages ( $V_G$ ).

1  
2  
3

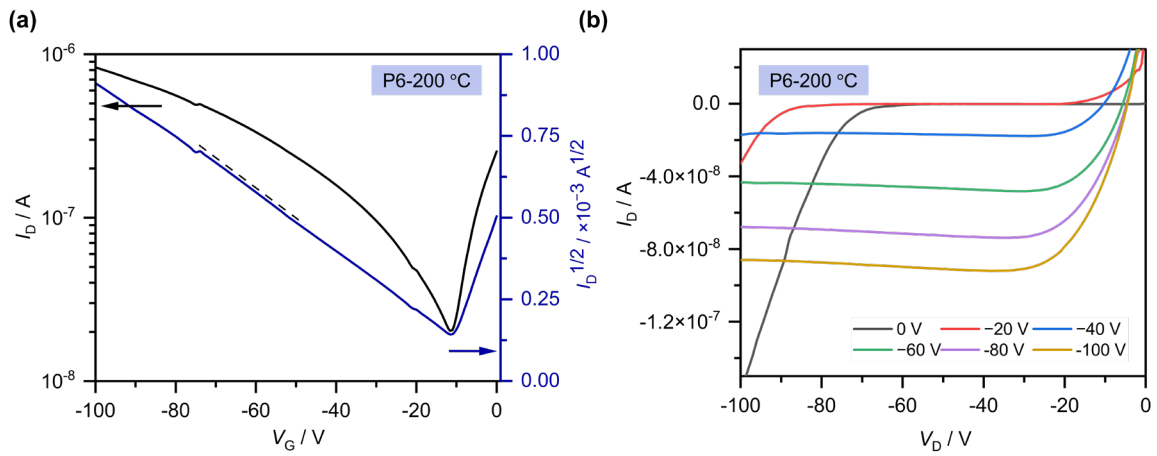

4  
5  
6  
7  
8  
9  
10  
11  
12  
13  
14

**Fig. S14** (a) Transfer ( $V_D = -100$  V) and (b) the corresponding output curves of OFET devices based on **P6** after thermal annealing at 200 °C, measured under vacuum. The drain current ( $I_D$ )–drain voltage ( $V_D$ ) curves were measured at different gate voltages ( $V_G$ ).

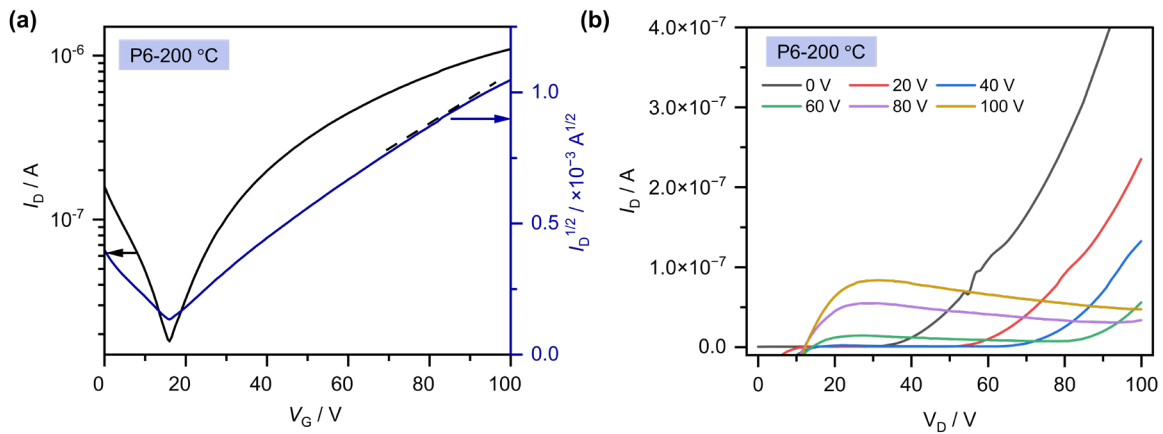

15  
16  
17  
18  
19  
20

**Fig. S15** (a) Transfer ( $V_D = 100$  V) and (b) the corresponding output curves of OFET devices based on **P6** after thermal annealing at 200 °C, measured under vacuum. The drain current ( $I_D$ )–drain voltage ( $V_D$ ) curves were measured at different gate voltages ( $V_G$ ).

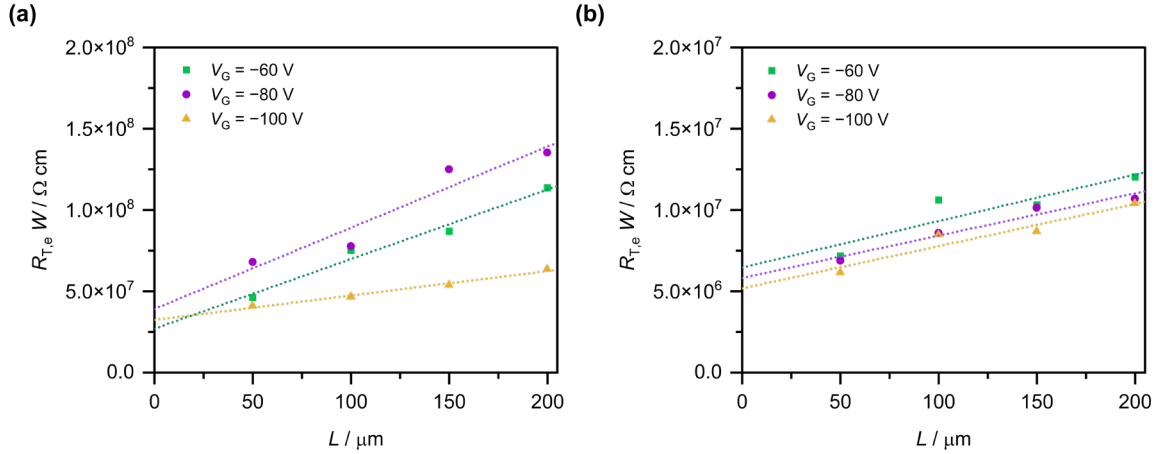

1  
2 **Fig. S16** Width-normalized total resistance ( $R_{T,e}W$ ) as a function of channel length for **P6** OFET devices  
3 with Au contacts measured under vacuum conditions: (a) p-type operation and (b) n-type operation. Linear  
4 fitting based on the transmission line method (TLM) was used to extract contact and channel resistance  
5 components.

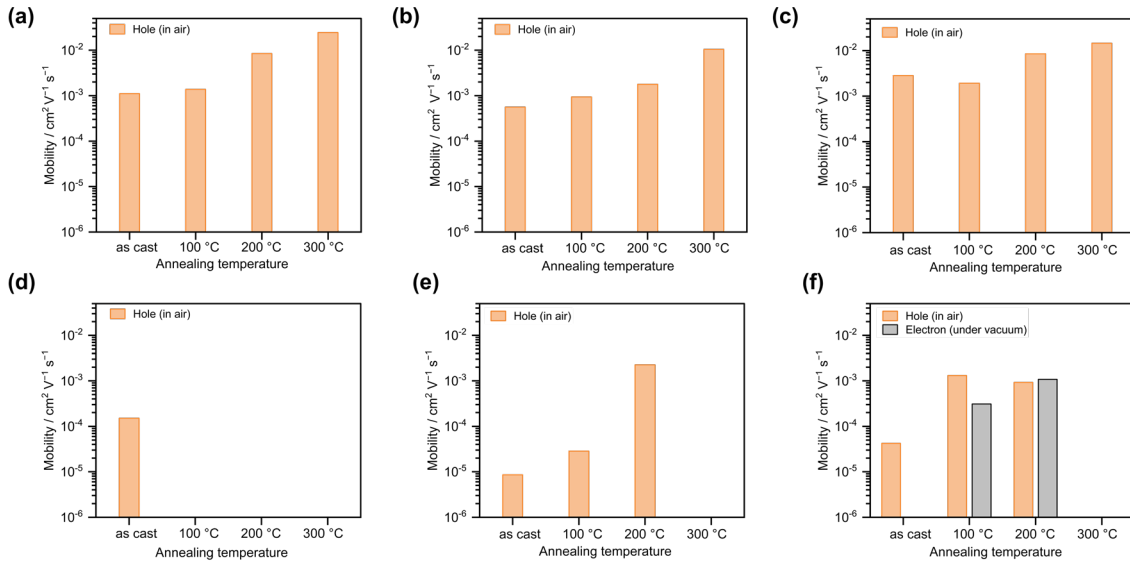

13  
14 **Fig. S17** Average hole mobility values of OFET devices based on **P1–P6**, calculated from five independent  
15 devices, as a function of annealing temperature: (a) **P1**, (b) **P2**, (c) **P3**, (d) **P4**, (e) **P5**, and (f) **P6**. The absence  
16 of a bar indicates that the devices did not function at the corresponding annealing temperature.

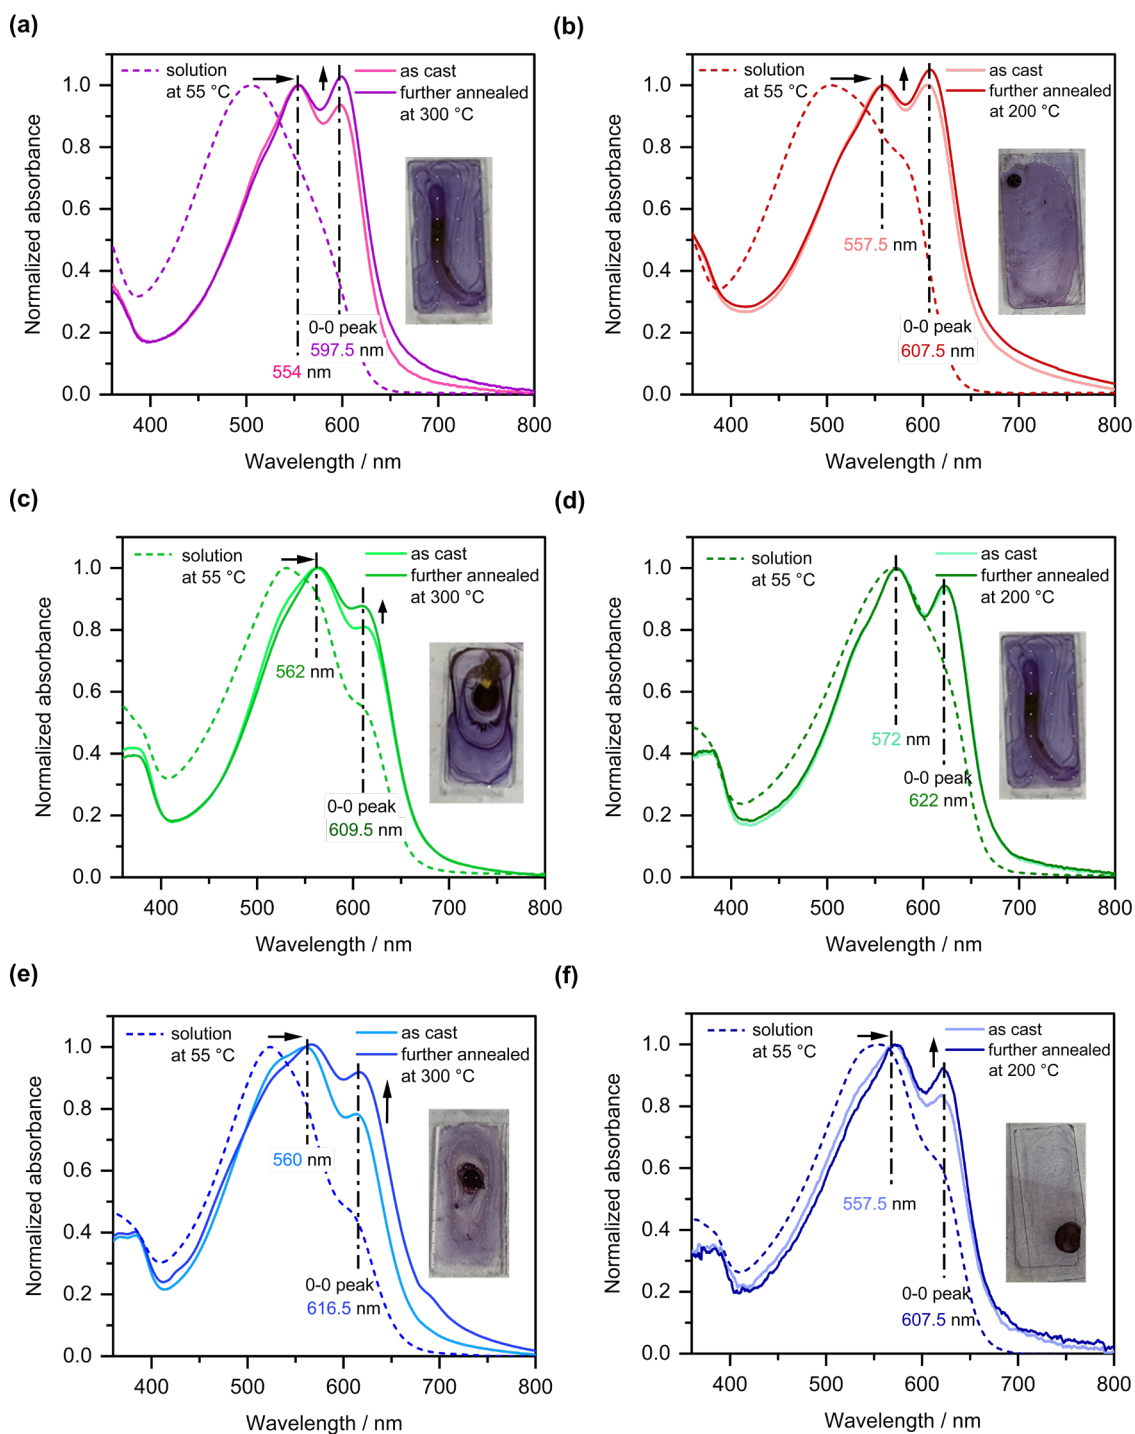

1

2 **Fig. S18** Normalized UV-vis absorption spectra of **P1–P6**. The spectra of partially dispersed polymer  
 3 solutions in chloroform at 55 °C are shown as dashed lines, while the absorption spectra of thin films in the  
 4 as-cast state and after thermal annealing are shown as solid lines. **P1–P3** were annealed at 300 °C and **P4–**  
 5 **P6** were annealed at 200 °C, respectively: (a) **P1**, (b) **P4**, (c) **P2**, (d) **P5**, (e) **P3**, and (f) **P6**.

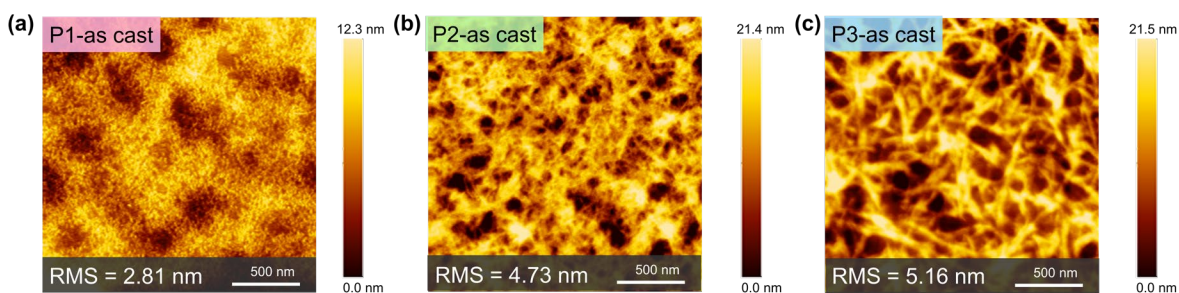

**Fig. S19** AFM height images ( $2 \times 2 \mu\text{m}^2$ ) of the as-cast thin films of (a) **P1**, (b) **P2**, and (c) **P3**. The root-mean-square (RMS) roughness values are indicated in the respective panels.

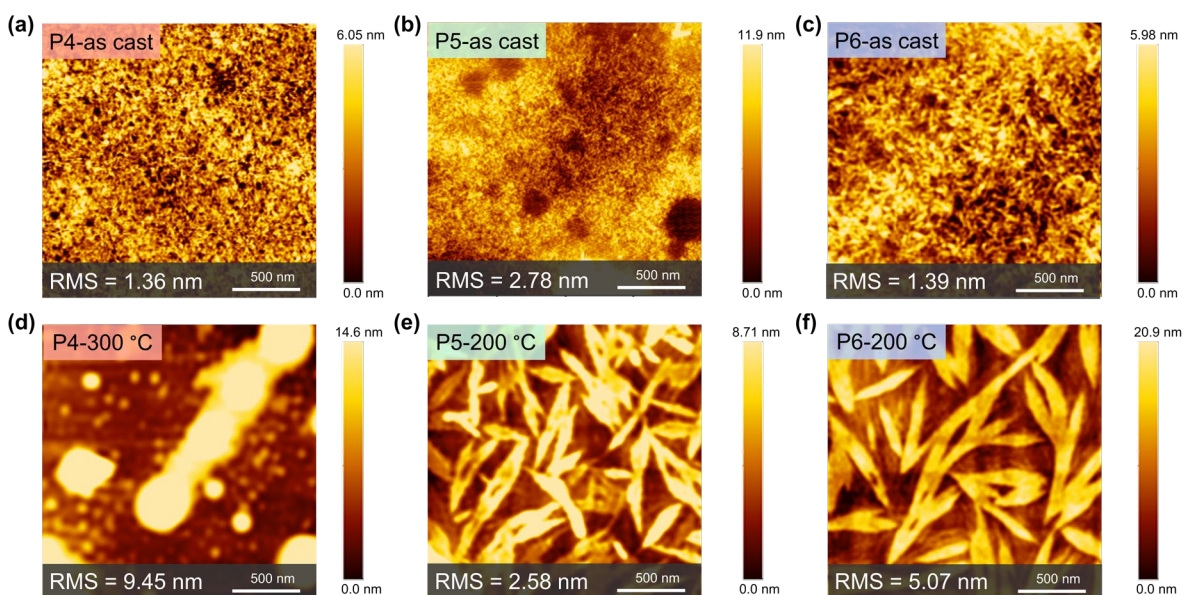

**Fig. S20** AFM height images ( $2 \times 2 \mu\text{m}^2$ ) of **P4–P6** thin films before and after thermal annealing: (a) As-cast **P4**, (b) as-cast **P5**, (c) as-cast **P6**, (d) **P4** annealed at 300 °C, (e) **P5** annealed at 200 °C, and (f) **P6** annealed at 200°C. The RMS roughness values are indicated in the respective panels.

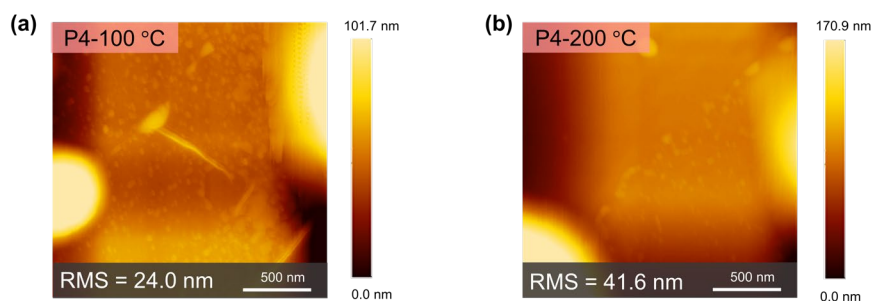

**Fig. S21** AFM height images ( $2 \times 2 \mu\text{m}^2$ ) of **P4** thin films after thermal annealing: (a) **P4** annealed at 100 °C, and (b) **P4** annealed at 200°C. The RMS roughness values are indicated in the respective panels.

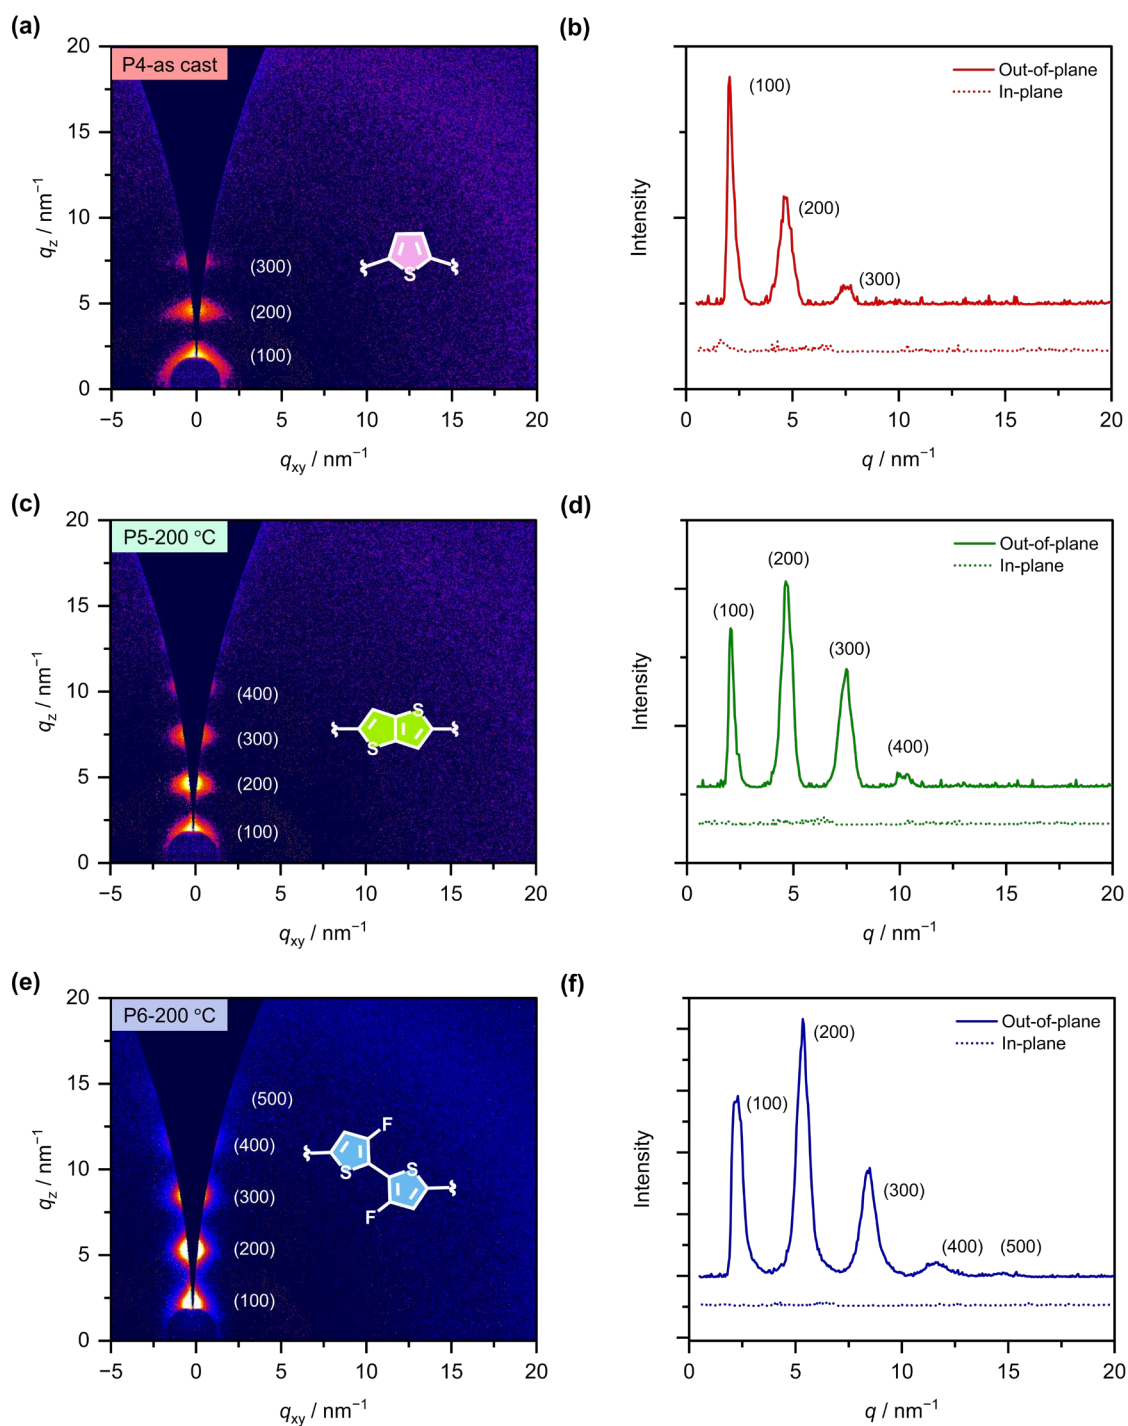

1  
2 **Fig. S22** GIWAXS characterization of polymer thin films. (a, c, e) 2D GIWAXS images of (a) **P4** (as cast),  
3 (c) **P5** (annealed at 200 °C), and (e) **P6** (annealed at 200 °C). (b, d, f) 1D Line-cut profiles, extracted from  
4 the out-of-plane ( $q_z$ , solid lines) and in-plane ( $q_{xy}$ , dotted lines) directions, of (b) **P4** (as cast), (d) **P5**  
5 (annealed at 200 °C), and (f) **P6** (annealed at 200 °C).  
6  
7

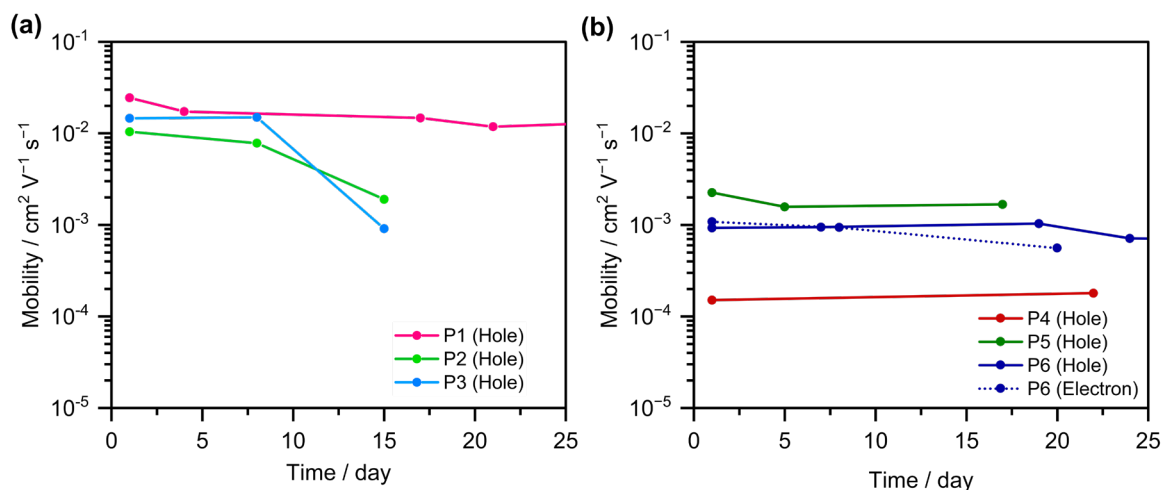

1  
 2 **Fig. S23** Stability of field-effect mobility for (a) short-branched (**P1–P3**) and (b) long-branched (**P4–P6**)  
 3 polymers as a function of storage time in a nitrogen-filled glovebox. All p-type mobilities were measured in  
 4 air, and n-type mobility for **P6** was measured under vacuum.

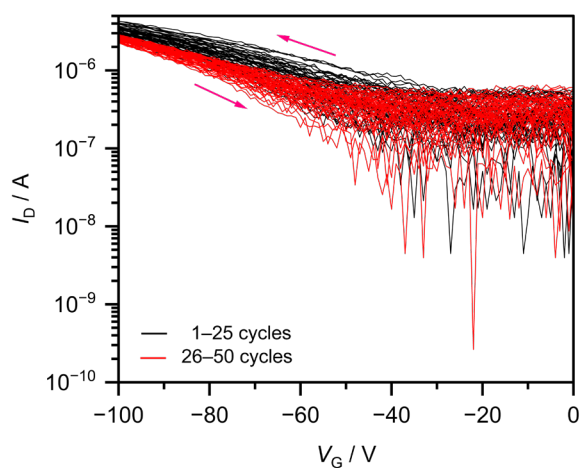

13  
 14 **Fig. S24** Transfer characteristics ( $I_D$ - $V_G$ ,  $V_D = -100$  V) of the OFET device based on **P1** measured over 50  
 15 consecutive cycles in air. The curves corresponding to cycles 1–25 and 26–50 are shown in black and red,  
 16 respectively.

1 **4. Tables S1–S7**

**PTQ-based semiconducting polymers**

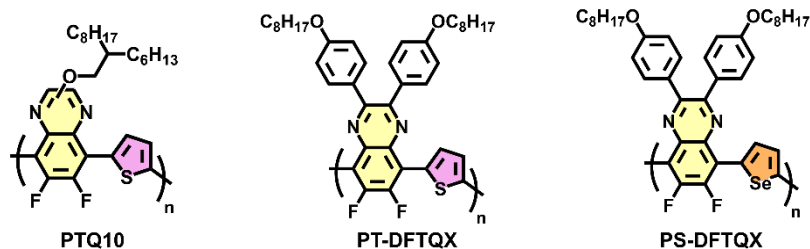

2  
3  
4  
5

**Table S1** Comparison of field-effect transistor mobilities in quinoxaline-based semiconducting polymers with reported literatures.

| Polymer                   | Operation mode | $\mu^a$<br>( $\text{cm}^2 \text{V}^{-1} \text{s}^{-1}$ ) | Device configuration <sup>b</sup> | Source/Drain electrode | $W/L^c$   | Reference |
|---------------------------|----------------|----------------------------------------------------------|-----------------------------------|------------------------|-----------|-----------|
| <b>P1<br/>(this work)</b> | <b>p-type</b>  | <b><math>2.45 \times 10^{-2}</math></b>                  | <b>TC/BG</b>                      | <b>50 nm Au</b>        | <b>10</b> | <b>-</b>  |
| PTQ10                     | p-type         | $2.45 \times 10^{-3}$                                    | BC/BG                             | 4 nm Cr<br>/ 40 nm Au  | 1000      | 41        |
| PT-DFTQX                  | p-type         | $1.2 \times 10^{-3}$                                     | BC                                | 100 nm Au              | 10        | 63        |
| PS-DFTQX                  | p-type         | $1.7 \times 10^{-2}$                                     | BC                                | 100 nm Au              | 10        | 63        |
| PQx-TVT                   | p-type         | $1.1 \times 10^{-3}$                                     | BC /TG                            | 50 nm Au               | 8         | 42        |
| PQx-QC                    | p-type         | $1.4 \times 10^{-3}$                                     | TC/BG                             | 100 nm Au              | 20        | 47        |
| PQx-TDPP                  | n-type         | 1.22                                                     | BC/TG                             | 3 nm Cr<br>/ 30 nm Au  | 50        | 43        |
| PQx-IDT                   | p-type         | $1.1 \times 10^{-1}$                                     | BC/BG                             | 50 nm Au               | 20        | 46        |
| PNPI2T- <i>o</i> F2       | p-type         | $1.4 \times 10^{-1}$                                     | BC/ TG                            | Cr/Au                  | 400       | 45        |
| PNPI2T- <i>o</i> F2       | n-type         | $7.1 \times 10^{-1}$                                     | BC/ TG                            | Cr/Au                  | 400       | 45        |

6 <sup>a</sup> Field-effect mobilities were reported as average values calculated from five independent devices for this  
7 work, whereas the literature values were cited as reported.

8 <sup>b</sup> Device configuration: TC/BG, top-contact/bottom-gate; BC/BG, bottom-contact/bottom-gate; BC/TG,  
9 bottom-contact/top-gate.

10 <sup>c</sup>  $W$  and  $L$  denote the channel width and length, respectively.

11

## 1 4.1 Polymerization conditions

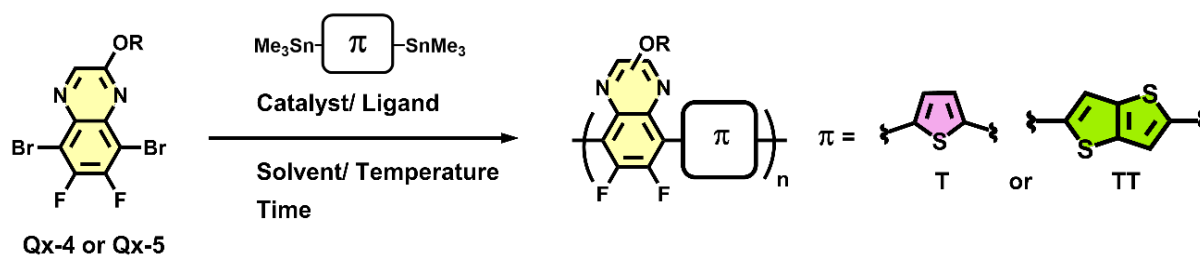

2

3

4 **Table S2** Polymerization conditions and the resulting molecular weights of quinoxaline-based  
5 semiconducting polymers.

| # | Monomer | $\pi$ | Catalyst/ Ligand                                                                           | Additive                       | Solvent /Temperature | Time | $M_n^a$ (g mol <sup>-1</sup> ) | PDI <sup>a</sup> |
|---|---------|-------|--------------------------------------------------------------------------------------------|--------------------------------|----------------------|------|--------------------------------|------------------|
| 1 | Qx-4    | T     | P( <i>tert</i> -Bu) <sub>3</sub> Pd G3<br>10 mol%                                          | K <sub>3</sub> PO <sub>4</sub> | THF<br>/ rt          | 24 h | 10.8 k                         | 1.86             |
| 2 | Qx-4    | T     | Pd <sub>2</sub> dba <sub>3</sub> / P( <i>o</i> -tolyl) <sub>3</sub><br>2 mol%/ 8 mol%      | -                              | Toluene<br>/ reflux  | 16 h | 2.4 k                          | 1.61             |
| 3 | Qx-5    | T     | Pd <sub>2</sub> dba <sub>3</sub> / P( <i>o</i> -tolyl) <sub>3</sub><br>4.4 mol%/ 17.6 mol% | CuI                            | Ph-Cl<br>/ reflux    | 48 h | 6.4 k                          | 1.89             |
| 4 | Qx-5    | TT    | Pd <sub>2</sub> dba <sub>3</sub> / P( <i>o</i> -tolyl) <sub>3</sub><br>4.4 mol%/ 17.6 mol% | CuI                            | Ph-Cl<br>/ reflux    | 48 h | 6.4 k                          | 2.24             |

6 <sup>a</sup> Determined by GPC using *o*-DCB as the eluent at 40 °C, calibrated against polystyrene standards.

7

## 8 4.2 Synthetic complexity index

9 A detailed derivation of the synthetic complexity index (SCI) has been reported in the perspective by Po *et*  
10 *al.*<sup>S7</sup>, and additional discussions focusing on conjugated polymer synthesis are described in a previous work  
11 <sup>S8</sup>. In this study, normalization was performed using the synthesis of D18, a representative donor polymer in  
12 the OPV field, as a reference.<sup>S9</sup>

$$13 \quad \text{SCI} = 35 \times \frac{N_{SS}}{N_{SS,MAX}} + 25 \times \frac{\log(RY)}{\log(RY_{MAX})} + 15 \times \frac{N_O}{N_{O,MAX}} + 15 \times \frac{N_C}{N_{C,MAX}} + 10 \times \frac{N_H}{N_{H,MAX}}$$

14 where  $N_{SS}$  is the number of synthetic steps (SS),  $RY$  is the reciprocal yield of the overall yield,  $N_O$  is the  
15 number of operations, including purification steps such as quenching, extraction, precipitation,  
16 recrystallization, and Soxhlet extraction,  $N_C$  is the number of chromatographic purifications, i.e., the  
17 number of column chromatography steps, and  $N_H$  is the number of associated GHS hazard codes (H-codes)  
18 assigned to the chemicals used in the polymerization step. The hazard categories and corresponding codes  
19 considered in this study include: carcinogenic/mutagenic (H340, H341, H350, H351), toxic to reproduction  
20 (H360, H361), highly toxic (H300, H304, H310, H330, H370, H372), environmentally toxic (H400, H410,

1 H411), highly reactive with water (H260, H261), highly flammable (H220, H222, H224, H250), highly  
 2 corrosive (H290, H314, H318), and explosive (H200, H201, H202, H203, H204, H205, H240, H241, H271).

3  
 4 **Table S3** Parameters used for the calculation of the polymerization-based SCI for D18 and polymers **P1–P6**.

| Polymer   | $N_{SS}$ | Yield | $RY$ | $N_O$ | $N_C$ | $N_H$ | SCI  |
|-----------|----------|-------|------|-------|-------|-------|------|
| D18       | 22       | 2.33% | 42.9 | 26    | 12    | 138   | 100  |
| <b>P1</b> | 5        | 8.78% | 11.4 | 8     | 1     | 23    | 31.7 |
| <b>P2</b> | 5        | 18.9% | 5.29 | 9     | 1     | 23    | 27.1 |
| <b>P3</b> | 5        | 8.85% | 11.3 | 9     | 1     | 23    | 32.2 |
| <b>P4</b> | 5        | 26.1% | 3.83 | 9     | 1     | 31    | 25.6 |
| <b>P5</b> | 5        | 23.3% | 4.29 | 9     | 1     | 31    | 26.3 |
| <b>P6</b> | 5        | 20.3% | 4.93 | 9     | 1     | 31    | 27.3 |

5  
 6

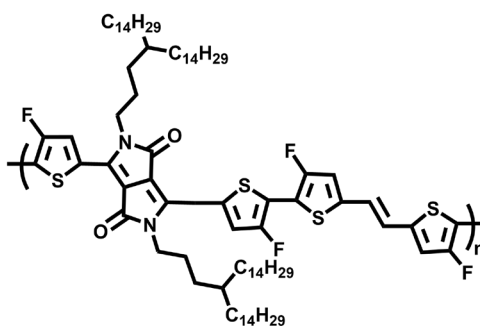

7 fDT-DPP-based copolymers

8 **Table S4** Parameters used for the calculation of the polymerization-based SCI for fDT-DPP-based  
 9 copolymers and polymers **P1–P6**.

| Polymer          | $N_{SS}$ | Yield | $RY$ | $N_O$ | $N_C$ | $N_H$ | SCI  |
|------------------|----------|-------|------|-------|-------|-------|------|
| fDT-DPP<br>based | 10       | 1.91% | 52.4 | 20    | 7     | 48    | 100  |
| <b>P1</b>        | 5        | 8.78% | 11.4 | 8     | 1     | 23    | 47.7 |
| <b>P2</b>        | 5        | 18.9% | 5.29 | 9     | 1     | 23    | 43.7 |
| <b>P3</b>        | 5        | 8.85% | 11.3 | 9     | 1     | 23    | 48.4 |
| <b>P4</b>        | 5        | 26.1% | 3.83 | 9     | 1     | 31    | 43.4 |
| <b>P5</b>        | 5        | 23.3% | 4.29 | 9     | 1     | 31    | 44.0 |
| <b>P6</b>        | 5        | 20.3% | 4.93 | 9     | 1     | 31    | 44.9 |

10  
 11  
 12

### 4.3 Characteristics

**Table S5** Electrochemically determined HOMO and LUMO energy levels and the corresponding band gaps ( $E_{\text{gap}}^{\text{CV}}$ ) for polymers **P1–P6**.

| Polymer   | $E_{\text{HOMO}}^{\text{CV}} / \text{eV}$ | $E_{\text{LUMO}}^{\text{CV}} / \text{eV}$ | $E_{\text{gap}}^{\text{CV}} / \text{eV}$ |
|-----------|-------------------------------------------|-------------------------------------------|------------------------------------------|
| <b>P1</b> | -5.57                                     | -3.36                                     | 2.21                                     |
| <b>P2</b> | -5.31                                     | -3.45                                     | 1.86                                     |
| <b>P3</b> | -5.54                                     | -3.54                                     | 2.00                                     |
| <b>P4</b> | -5.60                                     | -3.56                                     | 2.26                                     |
| <b>P5</b> | -5.29                                     | -3.63                                     | 1.66                                     |
| <b>P6</b> | -5.68                                     | -3.42                                     | 2.26                                     |

**Table S6** Summary of total resistance ( $R_{\text{T,e}}$ ), contact resistance ( $R_{\text{C,e}}$ ), and channel resistance ( $R_{\text{ch,e}}$ ) for **P6** OFET devices under p- and n-type operation at  $V_{\text{G}} = -100 \text{ V}$  and  $100 \text{ V}$ , respectively, measured under vacuum conditions.

| Operation mode | $R_{\text{T,e}}^a / \Omega \text{ cm}$ | $R_{\text{C,e}}^b / \Omega \text{ cm}$ | $R_{\text{ch,e}}^c / \Omega \text{ cm}$ |
|----------------|----------------------------------------|----------------------------------------|-----------------------------------------|
| <b>p-type</b>  | $4.65 \times 10^7$                     | $3.24 \times 10^7$                     | $1.41 \times 10^7$                      |
| <b>n-type</b>  | $8.47 \times 10^6$                     | $5.18 \times 10^6$                     | $3.29 \times 10^6$                      |

<sup>a</sup> width-normalized total resistance at channel length ( $L = 100 \mu\text{m}$ ).

<sup>b</sup> width-normalized contact resistance obtained from the y-intercept of the transfer line method (TLM) fitting.

<sup>c</sup> width-normalized channel resistance at  $L = 100 \mu\text{m}$  calculated from the TLM fitting.

**Table S7** Out-of-plane GIWAXS analysis of higher-order (200), (300), and (400) diffraction peaks for polymers **P1–P6**, including peak positions ( $q_z$ ) and full width at half maximum (FWHM) under the optimized annealing conditions.

| Polymer   | Annealing | Out-of-plane (200)     |                         | Out-of-plane (300)     |                         | Out-of-plane (400)     |                         |
|-----------|-----------|------------------------|-------------------------|------------------------|-------------------------|------------------------|-------------------------|
|           |           | $q_z / \text{nm}^{-1}$ | FWHM / $\text{nm}^{-1}$ | $q_z / \text{nm}^{-1}$ | FWHM / $\text{nm}^{-1}$ | $q_z / \text{nm}^{-1}$ | FWHM / $\text{nm}^{-1}$ |
| <b>P1</b> | 300 °C    | 8.77                   | 0.782                   | -                      | -                       | -                      | -                       |
| <b>P2</b> | 300 °C    | 9.39                   | 1.10                    | -                      | -                       | -                      | -                       |
| <b>P3</b> | 300 °C    | 11.4                   | 0.709                   | -                      | -                       | -                      | -                       |
| <b>P4</b> | as cast   | 4.69                   | 0.620                   | 7.52                   | 0.690                   | -                      | -                       |
| <b>P5</b> | 200 °C    | 4.70                   | 0.572                   | 7.46                   | 0.680                   | 10.2                   | 0.977                   |
| <b>P6</b> | 200 °C    | 5.36                   | 0.653                   | 8.44                   | 0.730                   | 11.6                   | 0.988                   |

# 5. Spectra

2  $^1\text{H}$  NMR (400 MHz,  $\text{CDCl}_3$ ) for Qx-5

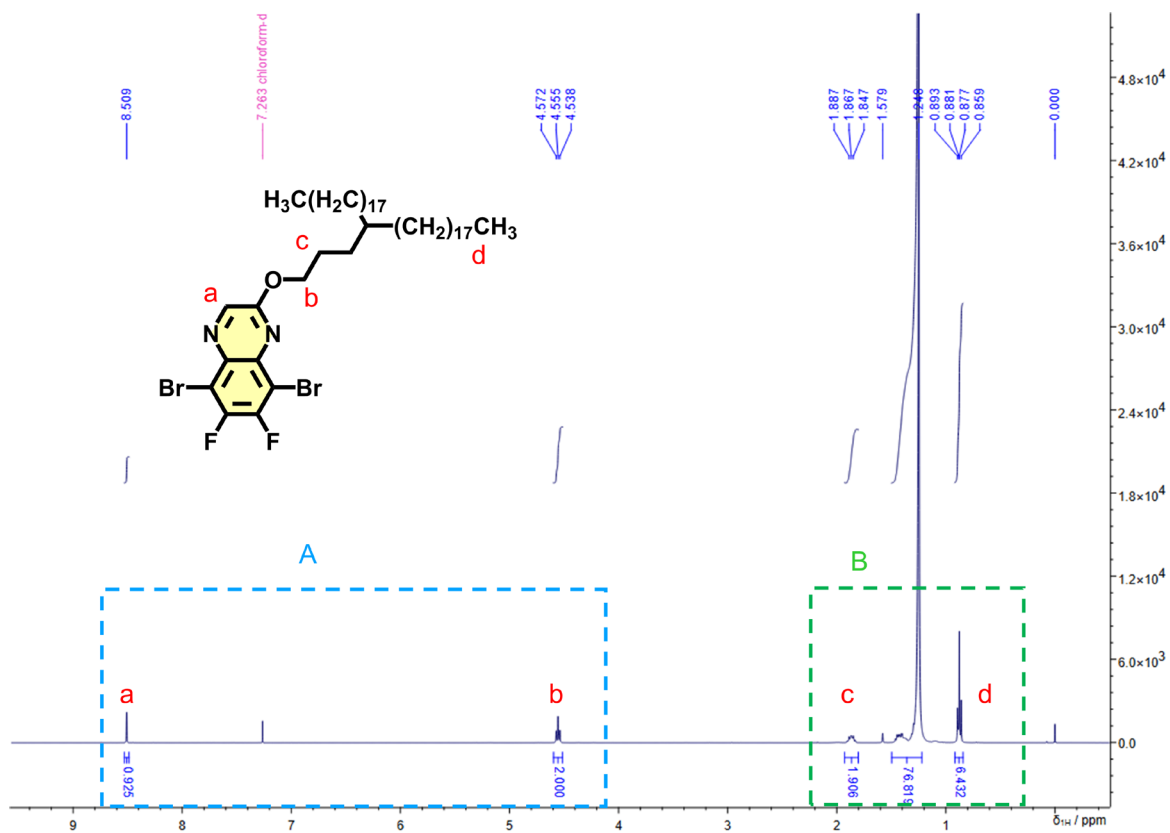

4 Expanded  $^1\text{H}$  NMR spectra in the low-field region (A)

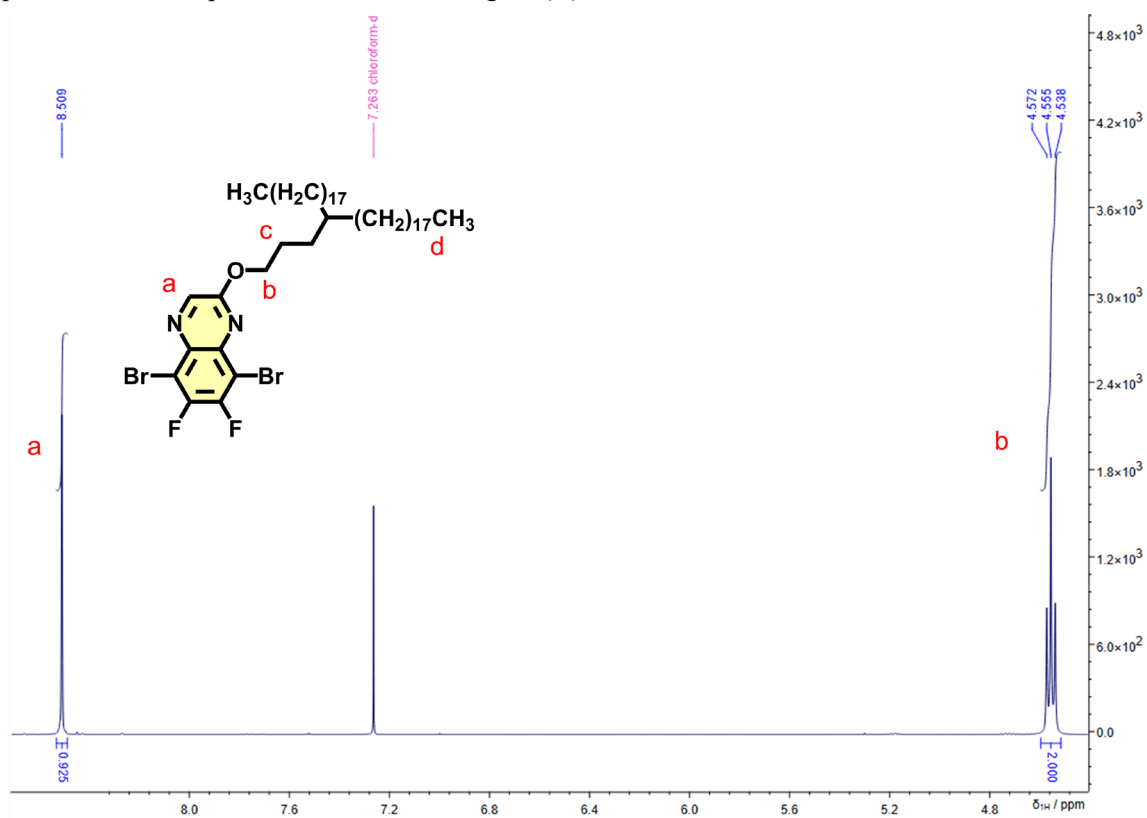

1 Expanded  $^1\text{H}$  NMR spectra in the high-field region (**B**)

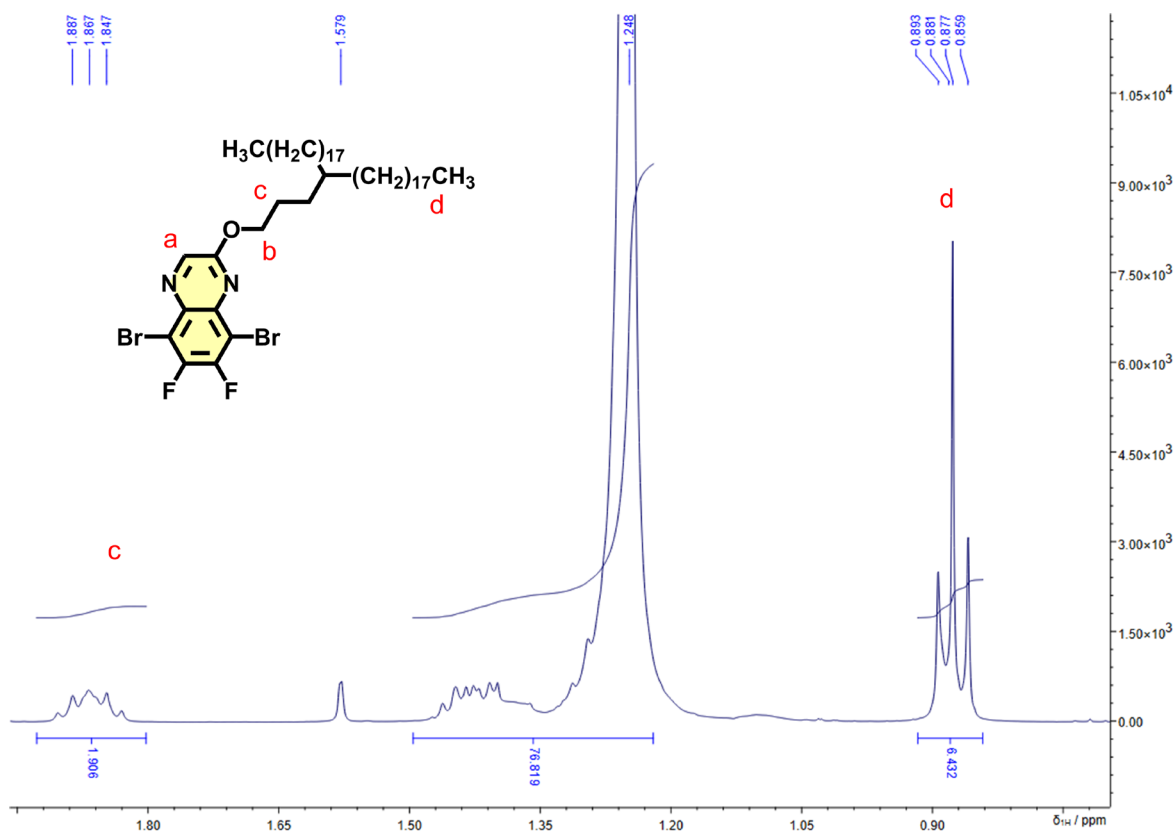

2

3  $^1\text{H}$ - $^1\text{H}$  COSY for **Qx-5**

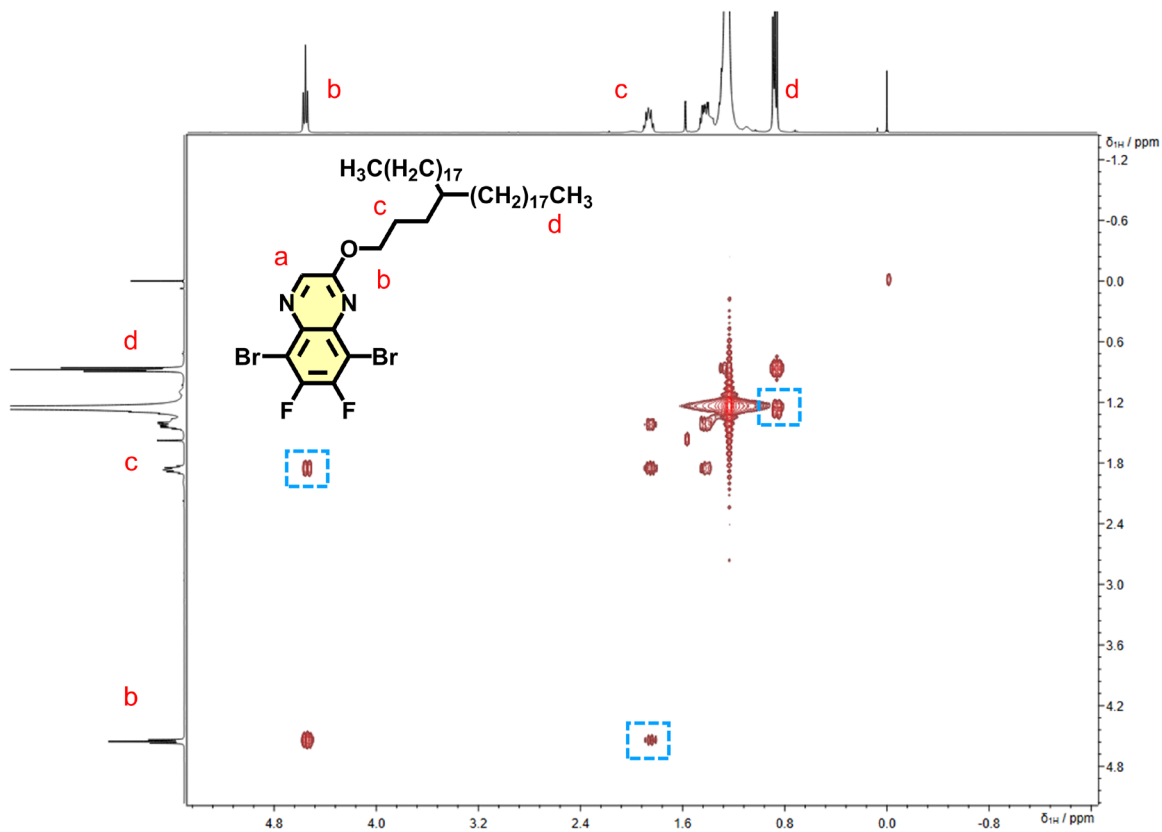

4

1  $^{13}\text{C}$  NMR (100 MHz,  $\text{CDCl}_3$ ) for **Qx-5**

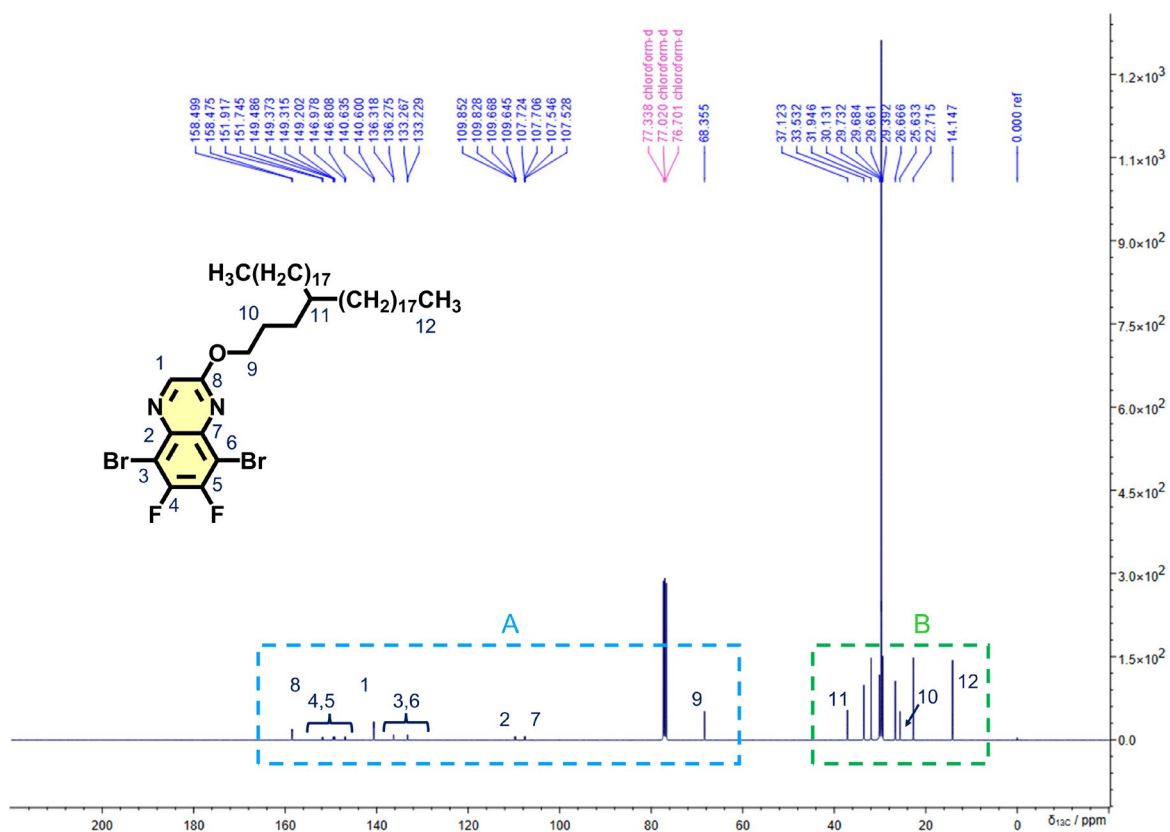

2

3 Expanded  $^{13}\text{C}$  NMR spectra in the low-field region (A)

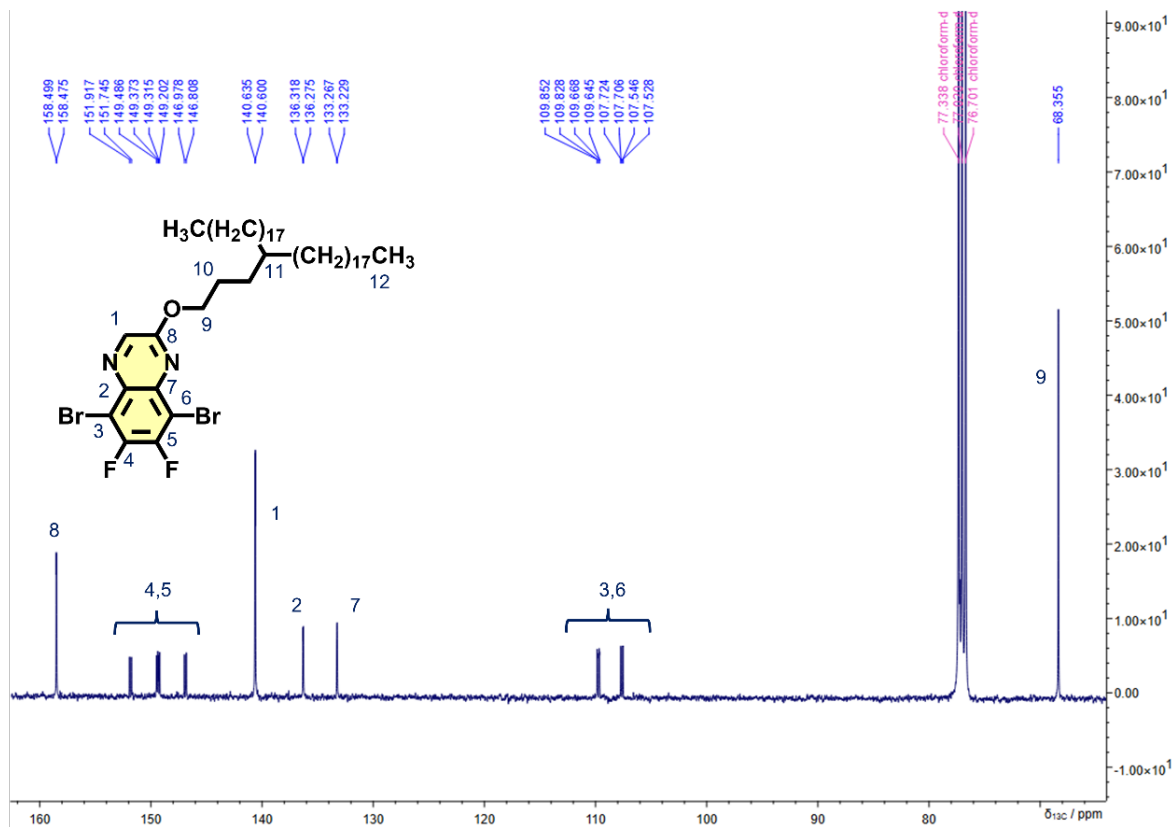

4

1 Expanded  $^{13}\text{C}$  NMR spectra in the high-field region (B)

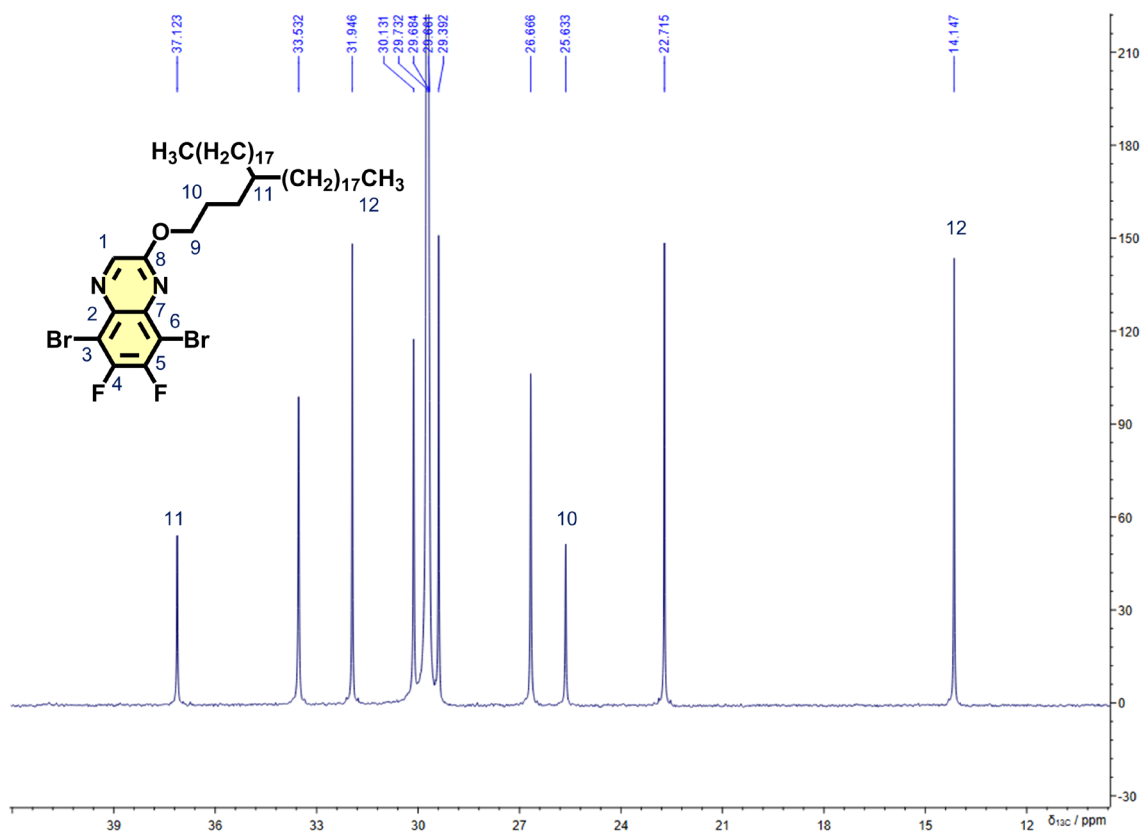

2

3 DEPT-135 for Qx-5

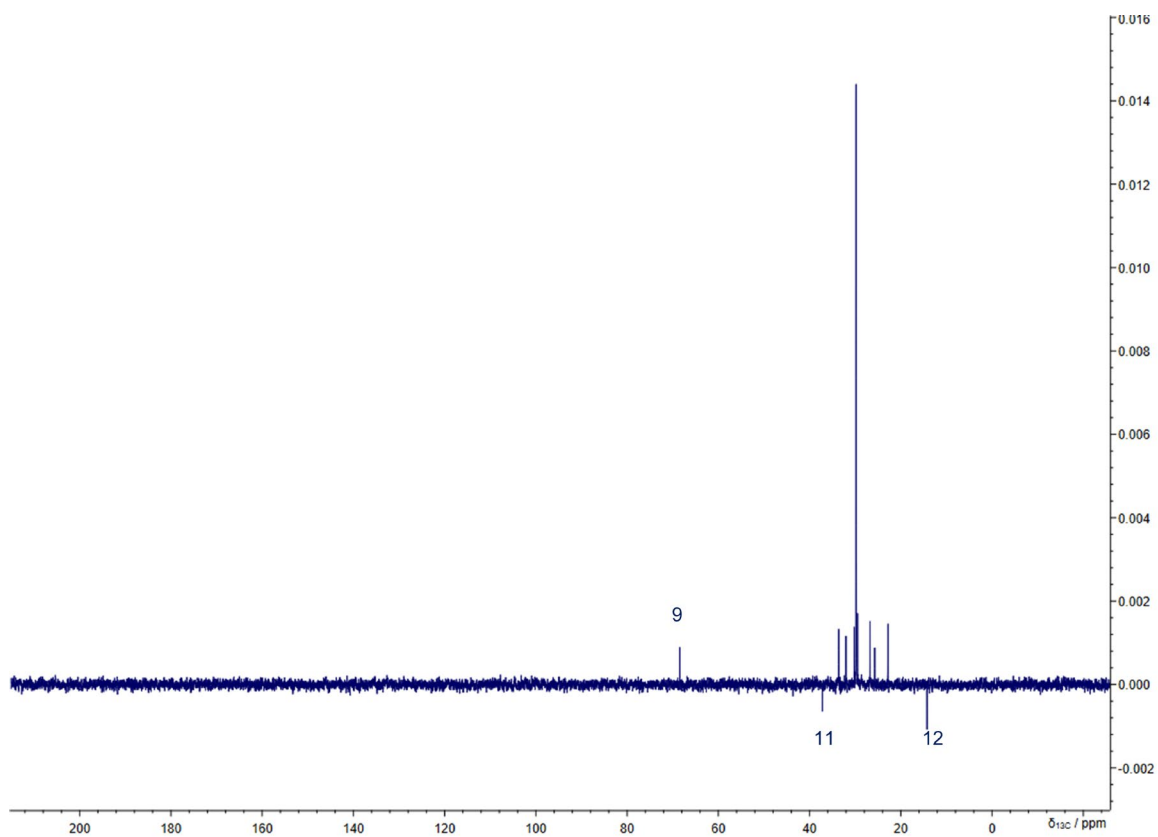

4

1 gHSQC for Qx-5

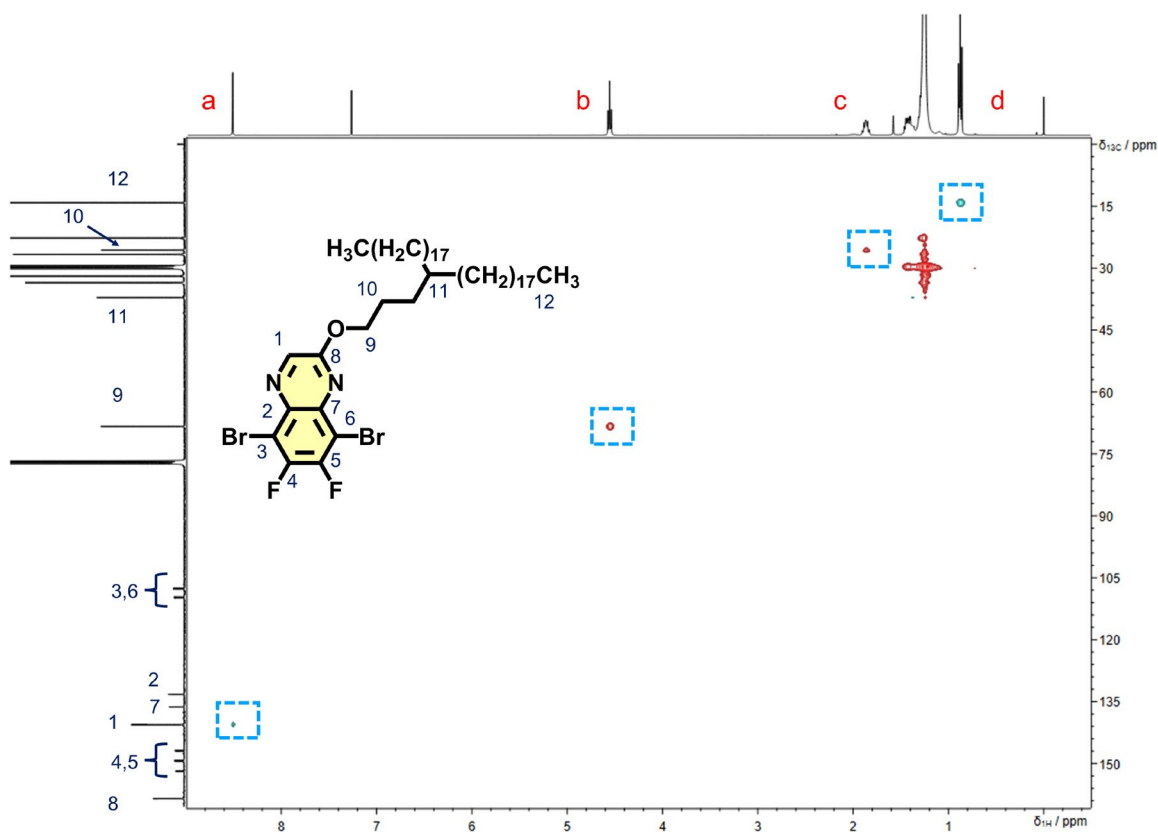

2

3 gHMBC for Qx-5

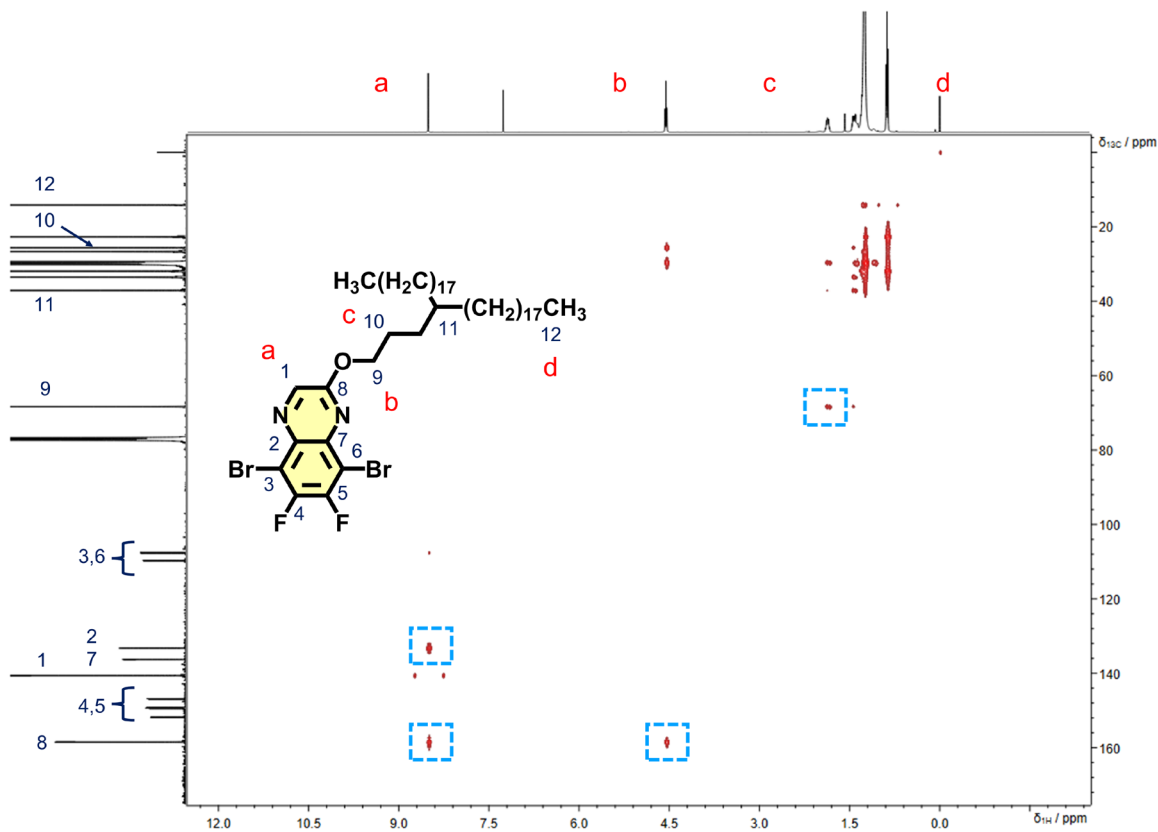

4

1  $^{19}\text{F}$  NMR (376 MHz,  $\text{CDCl}_3$ ) for **Qx-5**

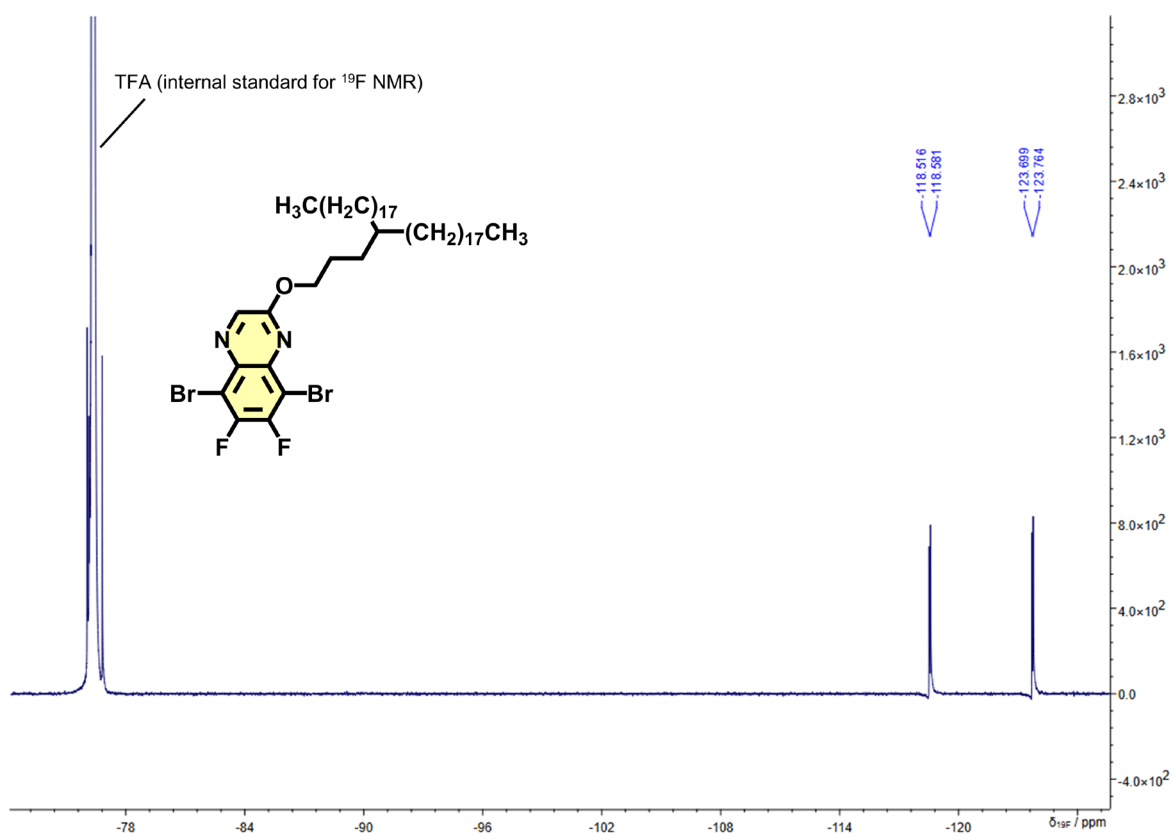

2

3  $^1\text{H}$  NMR (400 MHz,  $\text{CDCl}_3$ ) for **P1**

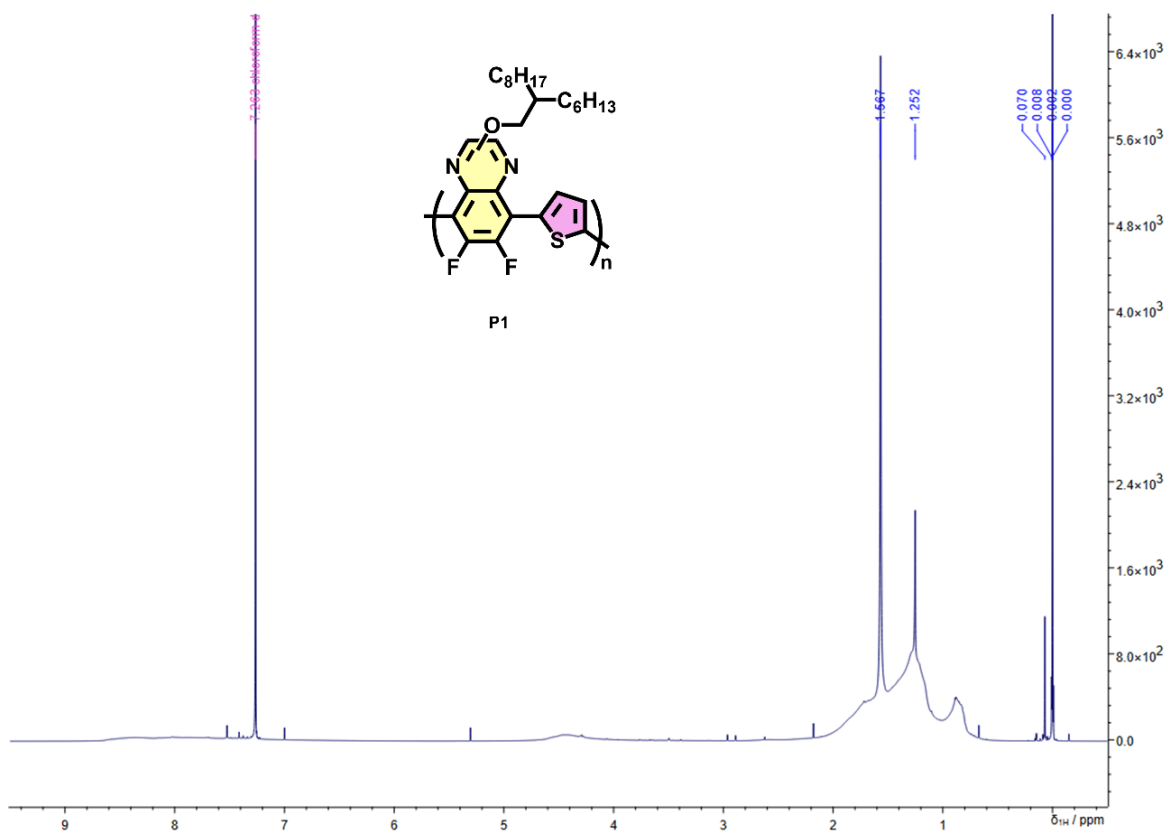

4

1  $^1\text{H}$  NMR (400 MHz,  $\text{CDCl}_3$ ) for P2

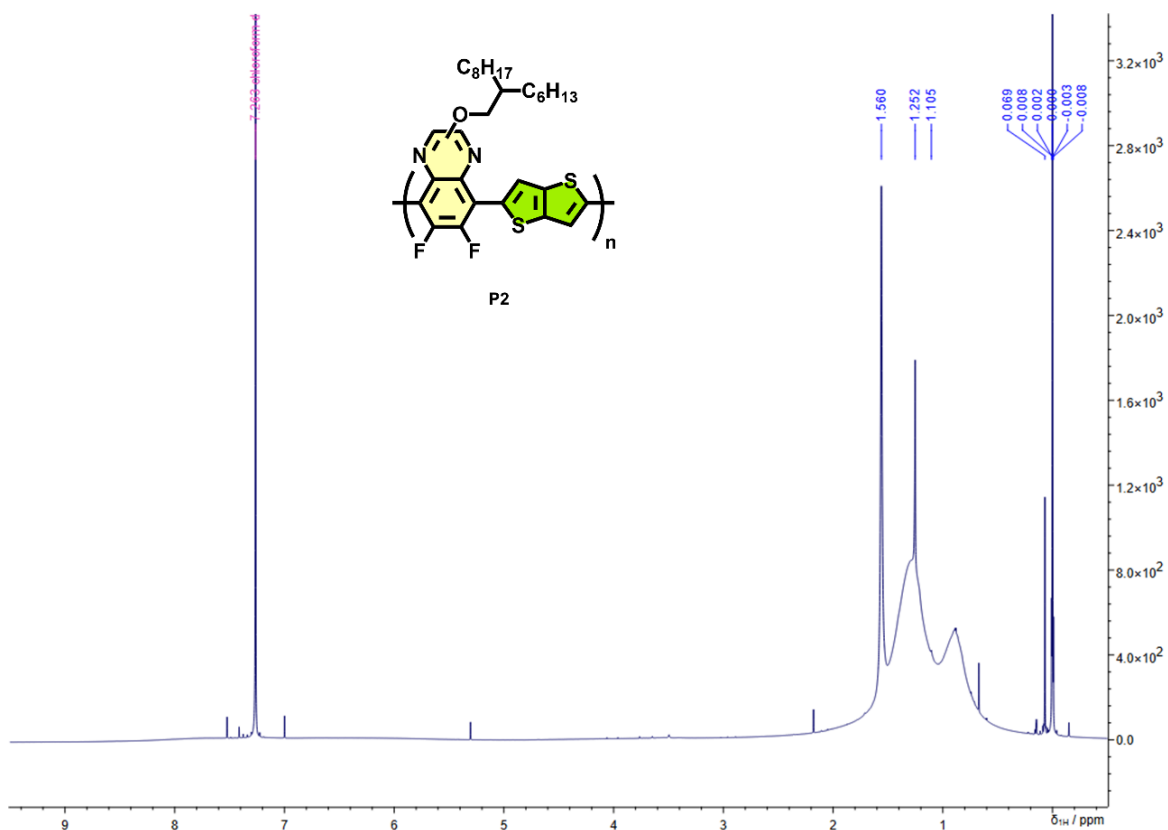

2

3  $^1\text{H}$  NMR (400 MHz,  $\text{CDCl}_3$ ) for P3

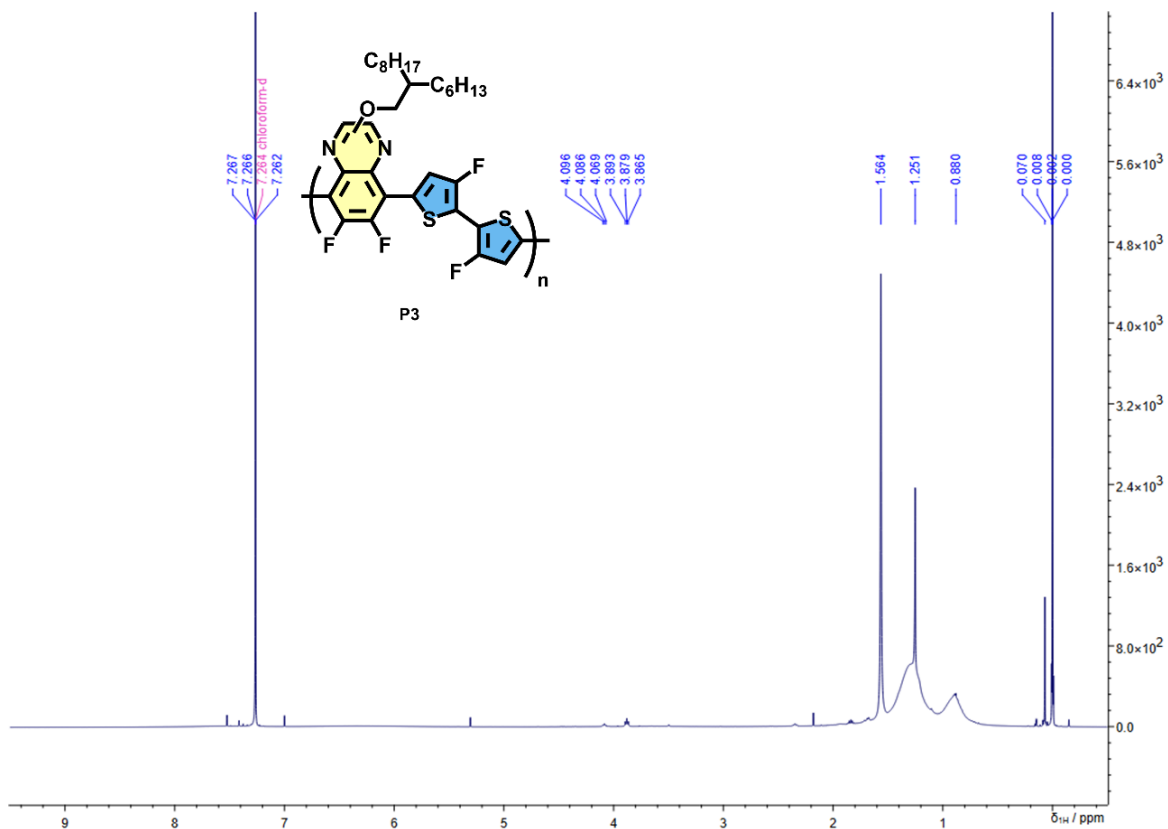

4

1  $^1\text{H}$  NMR (400 MHz,  $\text{CDCl}_3$ ) for **P4**

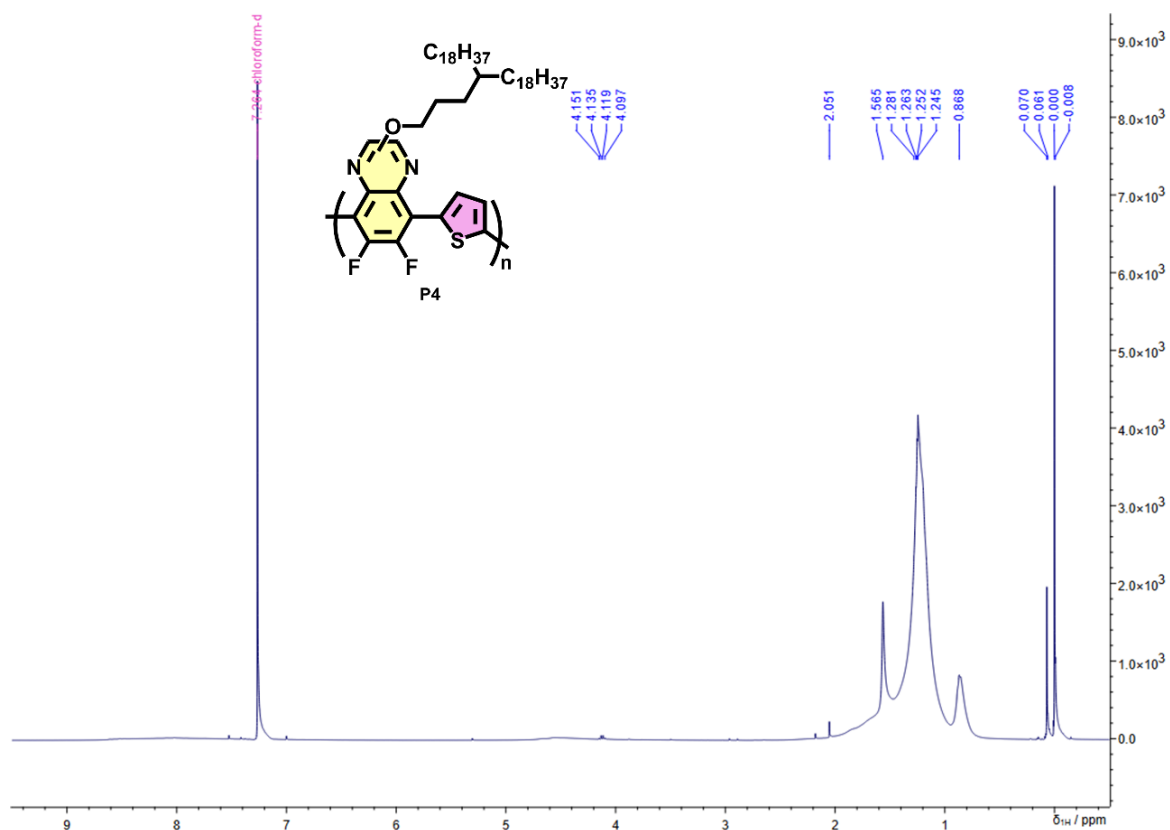

2

3  $^1\text{H}$  NMR (400 MHz,  $\text{CDCl}_3$ ) for **P5**

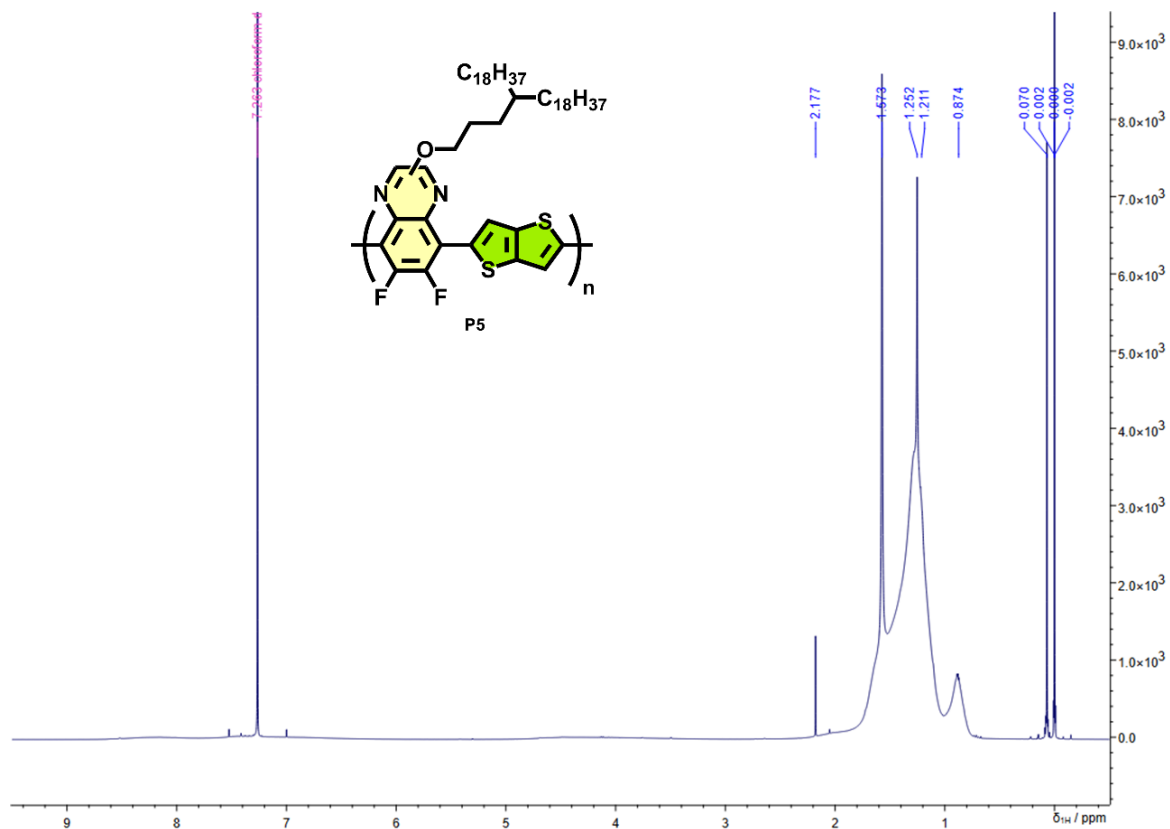

4

1  $^1\text{H}$  NMR (400 MHz,  $\text{CDCl}_3$ ) for **P6**

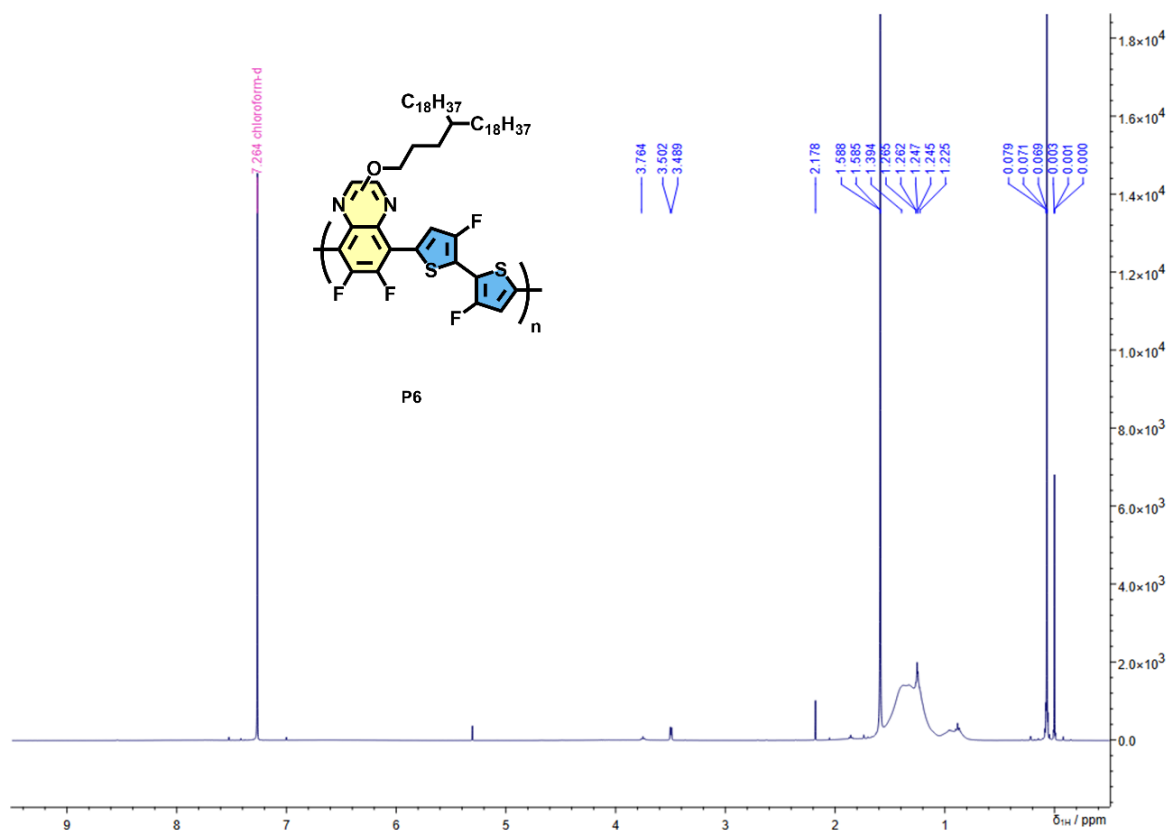

2  
3  
4  
5  
6  
7  
8  
9

10 MALDI-TOF-MS for **Qx-5**

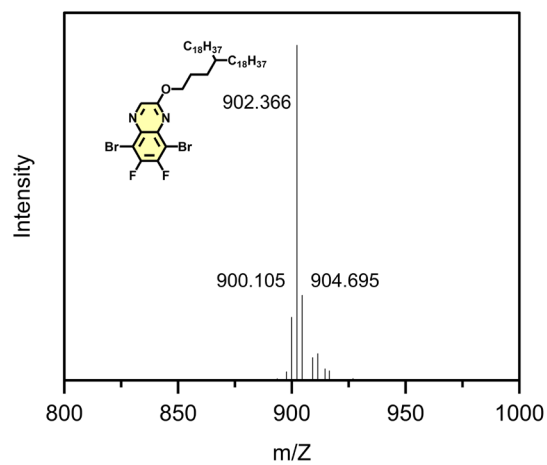

11

1 MALDI-TOF-MS for **P1**

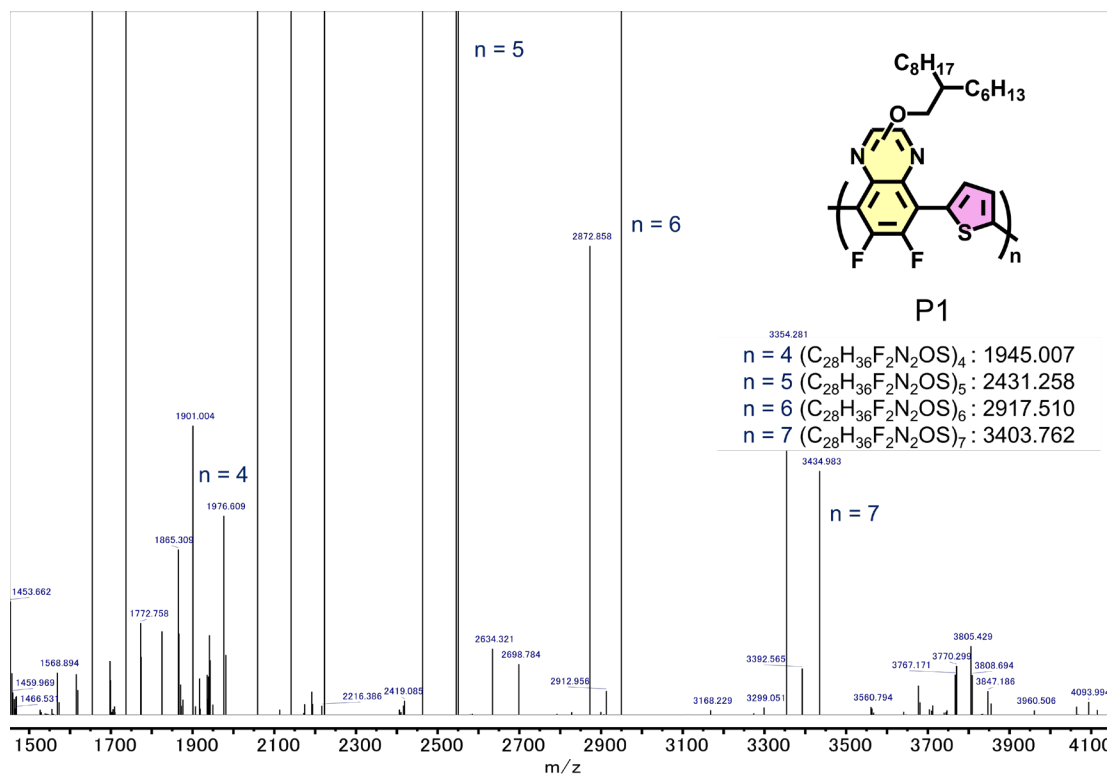

2  
3 The spacing of the peaks is consistent with a repeating unit mass of 487 Da.

4  
5 MALDI-TOF-MS for **P2**

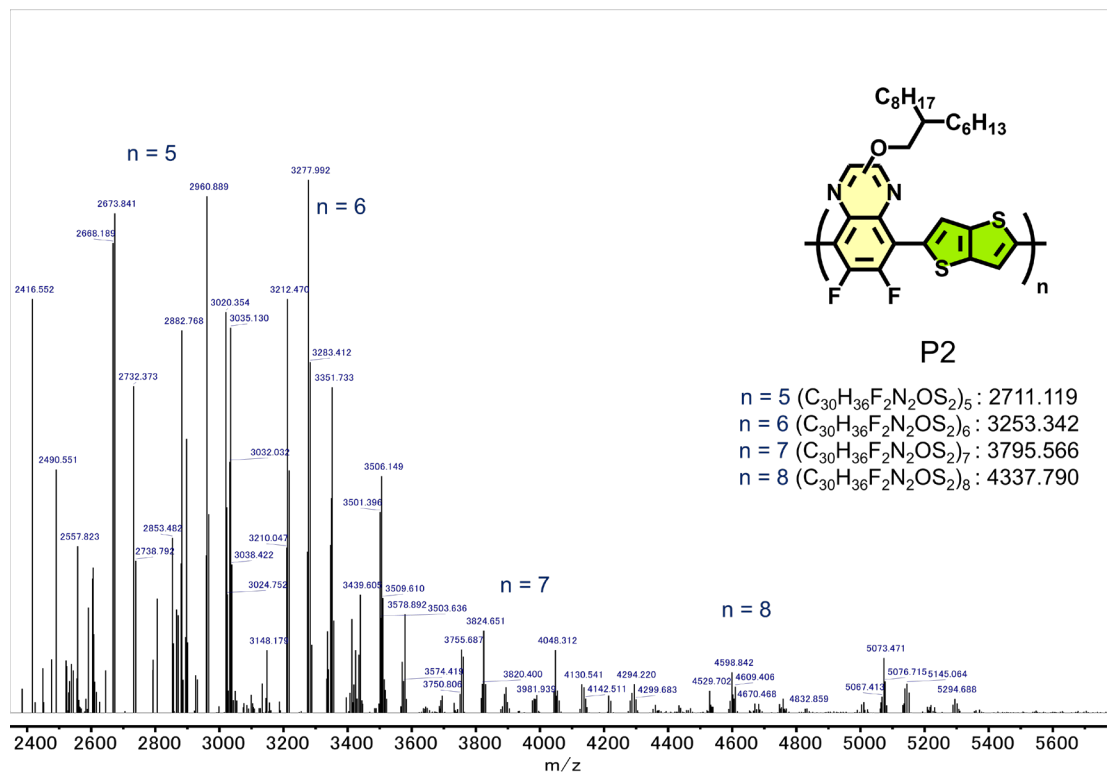

6  
7 The spacing of the peaks is consistent with a repeating unit mass of approximately 544 Da.

8

1 MALDI-TOF-MS for **P3**

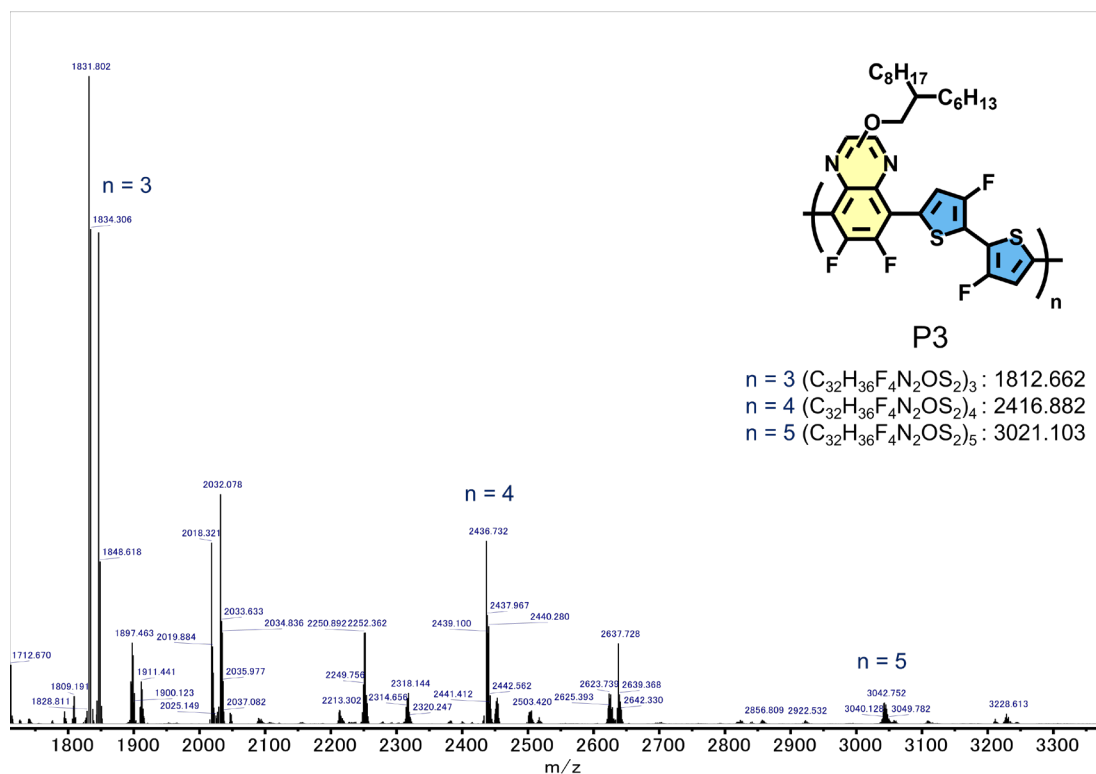

2  
3 The spacing of the peaks is consistent with a repeating unit mass of approximately 605 Da.

4  
5 MALDI-TOF-MS for **P4**

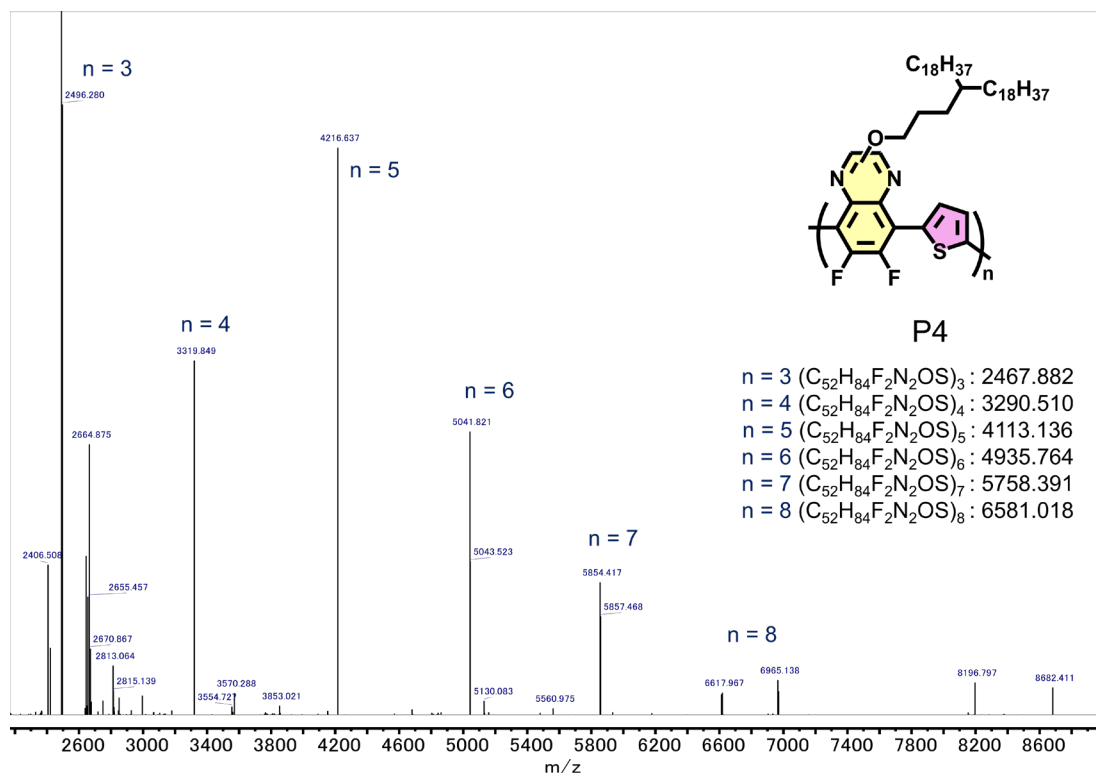

6  
7 The spacing of the peaks is consistent with a repeating unit mass of approximately 824 Da.

8

1 MALDI-TOF-MS for **P5**

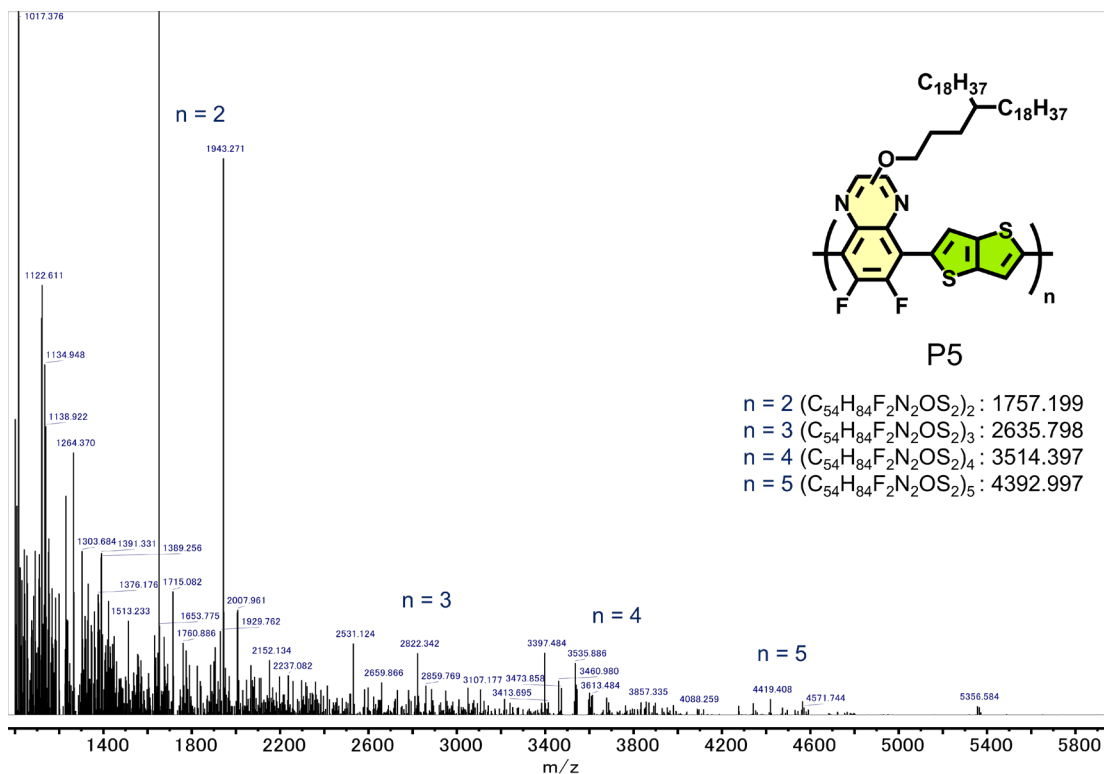

2

3 The spacing of the peaks is consistent with a repeating unit mass of approximately 880 Da.

4

5 MALDI-TOF-MS for **P6**

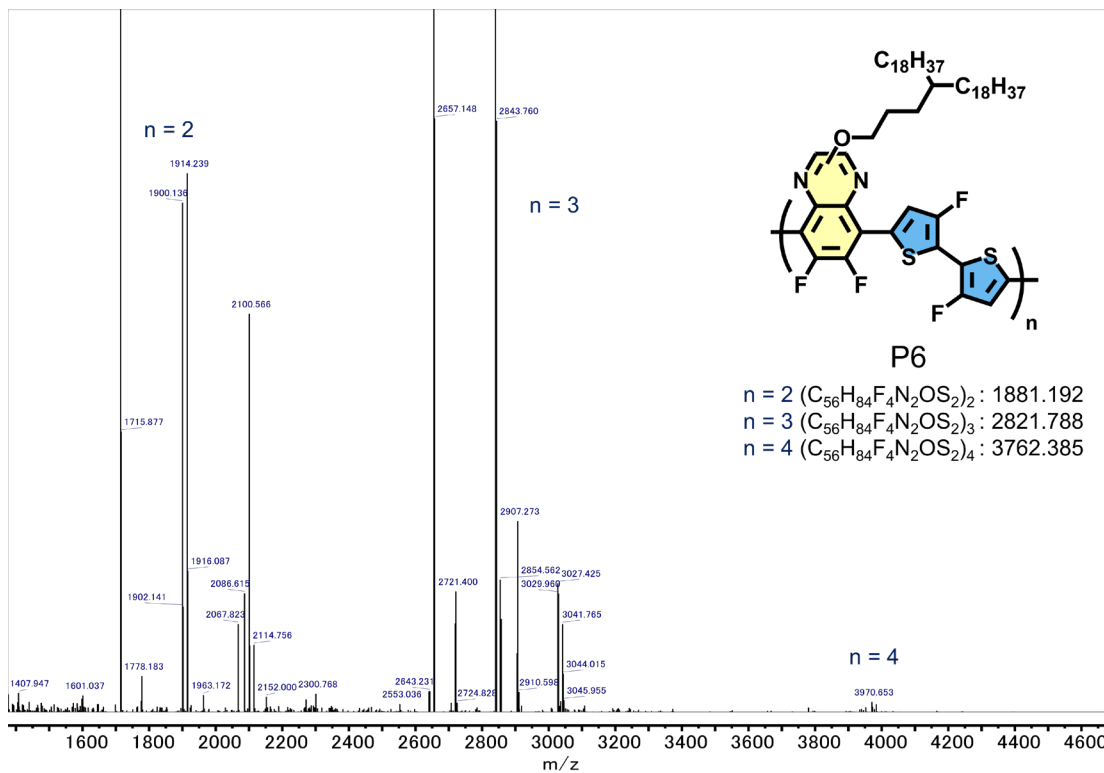

6

7 The spacing of the peaks is consistent with a repeating unit mass of approximately 942 Da.

8

1 FT-IR Spectra for **Qx-5**

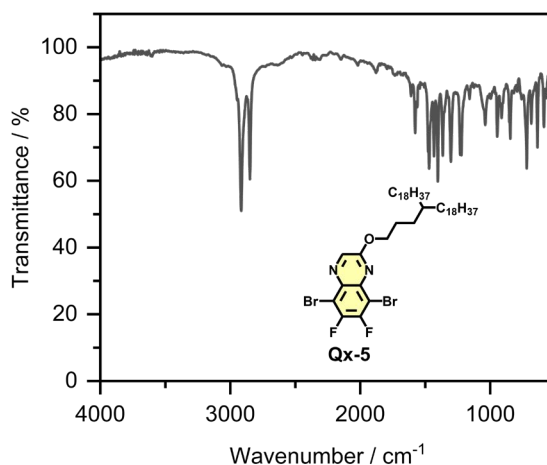

2

3

4 FT-IR Spectra for **P1–P6** (ATR)

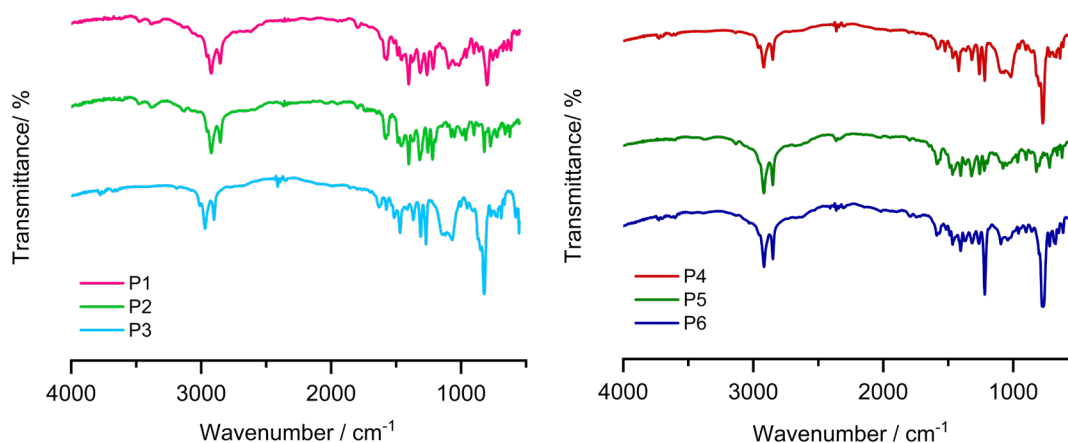

5

6

7 **6. Computed Data**

8 Computed data for **P1** and **P4**:

9 · Method:  $\omega$ B97XD/6-31G(d,p)

10 · Total electronic energy:  $-3845.04432703$  a.u.

11 · Imaginary frequencies: 0

12 · Cartesian coordinates: (see below)

13

| Center Number | Atomic Number | Atomic Type | X        | Y        | Z        |
|---------------|---------------|-------------|----------|----------|----------|
| 1             | 6             | 0           | -7.83813 | -0.98719 | 0.281713 |
| 2             | 6             | 0           | -8.86467 | -0.00033 | 0.501934 |
| 3             | 6             | 0           | -10.1377 | -0.3935  | 0.996341 |

|    |    |   |          |          |          |
|----|----|---|----------|----------|----------|
| 4  | 6  | 0 | -10.4215 | -1.74961 | 1.285159 |
| 5  | 6  | 0 | -9.44166 | -2.66831 | 1.078332 |
| 6  | 6  | 0 | -8.17316 | -2.28978 | 0.580656 |
| 7  | 7  | 0 | -8.6095  | 1.30272  | 0.244301 |
| 8  | 6  | 0 | -9.56195 | 2.170147 | 0.453054 |
| 9  | 6  | 0 | -10.8437 | 1.777031 | 0.942622 |
| 10 | 7  | 0 | -11.1152 | 0.526005 | 1.206631 |
| 11 | 9  | 0 | -9.63735 | -3.96363 | 1.325851 |
| 12 | 9  | 0 | -7.29607 | -3.28132 | 0.412223 |
| 13 | 6  | 0 | -4.05787 | -0.46726 | -0.71488 |
| 14 | 6  | 0 | -4.80328 | 0.48542  | -1.36207 |
| 15 | 6  | 0 | -6.18713 | 0.396306 | -1.09084 |
| 16 | 6  | 0 | -6.50956 | -0.62743 | -0.23338 |
| 17 | 16 | 0 | -5.0798  | -1.50195 | 0.226734 |
| 18 | 6  | 0 | 0.28736  | -1.02229 | -0.84328 |
| 19 | 6  | 0 | -0.29989 | 0.283971 | -0.78422 |
| 20 | 6  | 0 | -1.70513 | 0.476121 | -0.74068 |
| 21 | 6  | 0 | -2.00485 | -1.87926 | -0.78465 |
| 22 | 6  | 0 | -0.61141 | -2.06908 | -0.82095 |
| 23 | 7  | 0 | 0.532312 | 1.36163  | -0.76457 |
| 24 | 6  | 0 | 0.017867 | 2.552478 | -0.69452 |
| 25 | 6  | 0 | -1.39673 | 2.733205 | -0.64315 |
| 26 | 7  | 0 | -2.22529 | 1.732146 | -0.67097 |
| 27 | 9  | 0 | -2.74301 | -2.99037 | -0.78187 |
| 28 | 9  | 0 | -0.21151 | -3.34417 | -0.83808 |
| 29 | 6  | 0 | -2.60006 | -0.63896 | -0.74809 |
| 30 | 6  | 0 | 8.45269  | -0.47153 | 0.311899 |
| 31 | 6  | 0 | 7.5176   | 0.615435 | 0.195541 |
| 32 | 6  | 0 | 6.14829  | 0.373472 | -0.11264 |
| 33 | 6  | 0 | 5.628493 | -0.94802 | -0.33043 |
| 34 | 6  | 0 | 6.552533 | -1.95651 | -0.18522 |
| 35 | 6  | 0 | 7.910948 | -1.71963 | 0.111715 |
| 36 | 7  | 0 | 7.95106  | 1.879104 | 0.395692 |
| 37 | 6  | 0 | 7.099121 | 2.862881 | 0.298676 |
| 38 | 6  | 0 | 5.729894 | 2.62829  | -0.00702 |
| 39 | 7  | 0 | 5.291377 | 1.413696 | -0.20392 |
| 40 | 9  | 0 | 6.224135 | -3.24426 | -0.32293 |
| 41 | 9  | 0 | 8.666291 | -2.81721 | 0.204075 |

|    |    |   |          |          |          |
|----|----|---|----------|----------|----------|
| 42 | 6  | 0 | 12.22189 | -0.51718 | 1.424107 |
| 43 | 6  | 0 | 11.98714 | 0.696906 | 0.849981 |
| 44 | 6  | 0 | 10.64881 | 0.838822 | 0.398059 |
| 45 | 6  | 0 | 9.87484  | -0.27455 | 0.62235  |
| 46 | 16 | 0 | 10.82653 | -1.51444 | 1.403302 |
| 47 | 16 | 0 | 2.920443 | -0.13389 | -0.32361 |
| 48 | 6  | 0 | 1.734569 | -1.26567 | -0.90202 |
| 49 | 6  | 0 | 2.346938 | -2.39957 | -1.38836 |
| 50 | 6  | 0 | 3.748664 | -2.38006 | -1.25366 |
| 51 | 6  | 0 | 4.22633  | -1.2315  | -0.66064 |
| 52 | 8  | 0 | -9.235   | 3.443813 | 0.171963 |
| 53 | 6  | 0 | -10.2043 | 4.455894 | 0.375781 |
| 54 | 8  | 0 | -1.83594 | 3.992337 | -0.55959 |
| 55 | 6  | 0 | -3.25011 | 4.165833 | -0.50867 |
| 56 | 8  | 0 | 7.619951 | 4.083512 | 0.508099 |
| 57 | 6  | 0 | 6.760658 | 5.206904 | 0.43683  |
| 58 | 1  | 0 | -11.3964 | -2.03153 | 1.661799 |
| 59 | 1  | 0 | -11.6364 | 2.498278 | 1.114796 |
| 60 | 1  | 0 | -4.36153 | 1.23223  | -2.0062  |
| 61 | 1  | 0 | -6.92474 | 1.074197 | -1.49328 |
| 62 | 1  | 0 | 0.680991 | 3.412883 | -0.67597 |
| 63 | 1  | 0 | 5.005436 | 3.432248 | -0.08913 |
| 64 | 1  | 0 | 13.14495 | -0.8898  | 1.845225 |
| 65 | 1  | 0 | 12.73931 | 1.469495 | 0.751934 |
| 66 | 1  | 0 | 10.25646 | 1.735881 | -0.05568 |
| 67 | 1  | 0 | 1.809414 | -3.22423 | -1.83189 |
| 68 | 1  | 0 | 4.383129 | -3.18795 | -1.58541 |
| 69 | 1  | 0 | -9.72135 | 5.3894   | 0.089879 |
| 70 | 1  | 0 | -11.088  | 4.302518 | -0.25412 |
| 71 | 1  | 0 | -10.5093 | 4.517728 | 1.426658 |
| 72 | 1  | 0 | -3.40747 | 5.236088 | -0.38314 |
| 73 | 1  | 0 | -3.71585 | 3.81946  | -1.43534 |
| 74 | 1  | 0 | -3.68334 | 3.609328 | 0.325852 |
| 75 | 1  | 0 | 7.387991 | 6.072644 | 0.644496 |
| 76 | 1  | 0 | 6.318869 | 5.314835 | -0.56047 |
| 77 | 1  | 0 | 5.963686 | 5.153235 | 1.187305 |

---

1

2 Computed data for **P2** and **P5**:

- 1 · Method:  $\omega$ B97XD/6-31G(d,p)
- 2 · Total electronic energy: - 5268.11567605 a.u.
- 3 · Imaginary frequencies: 0
- 4 · Cartesian coordinates: (see below)

| <b>Center<br/>Number</b> | <b>Atomic<br/>Number</b> | <b>Atomic<br/>Type</b> | <b>X</b> | <b>Y</b> | <b>Z</b> |
|--------------------------|--------------------------|------------------------|----------|----------|----------|
| 1                        | 7                        | 0                      | 0.894649 | 1.796504 | 1.004002 |
| 2                        | 6                        | 0                      | 1.615622 | 2.783812 | 1.442832 |
| 3                        | 6                        | 0                      | 3.040052 | 2.698998 | 1.437502 |
| 4                        | 7                        | 0                      | 3.670055 | 1.649229 | 1.000002 |
| 5                        | 9                        | 0                      | 3.305411 | -2.74856 | -0.76646 |
| 6                        | 9                        | 0                      | 0.762188 | -2.62986 | -0.75418 |
| 7                        | 6                        | 0                      | 1.512982 | 0.675736 | 0.542159 |
| 8                        | 6                        | 0                      | 2.930013 | 0.602554 | 0.542488 |
| 9                        | 6                        | 0                      | 3.605785 | -0.5719  | 0.08347  |
| 10                       | 6                        | 0                      | 2.78809  | -1.59859 | -0.33115 |
| 11                       | 6                        | 0                      | 1.383647 | -1.52607 | -0.32582 |
| 12                       | 6                        | 0                      | 0.689383 | -0.40318 | 0.078706 |
| 13                       | 6                        | 0                      | 11.13103 | -0.98887 | 0.209874 |
| 14                       | 6                        | 0                      | 12.02618 | -0.05606 | -0.42298 |
| 15                       | 6                        | 0                      | 13.43377 | -0.21    | -0.32371 |
| 16                       | 6                        | 0                      | 13.99564 | -1.27833 | 0.412795 |
| 17                       | 6                        | 0                      | 13.14468 | -2.14366 | 1.024709 |
| 18                       | 6                        | 0                      | 11.74075 | -1.99729 | 0.930962 |
| 19                       | 7                        | 0                      | 11.50539 | 0.981153 | -1.11193 |
| 20                       | 6                        | 0                      | 12.32208 | 1.824477 | -1.68263 |
| 21                       | 6                        | 0                      | 13.73799 | 1.662486 | -1.5959  |
| 22                       | 7                        | 0                      | 14.27058 | 0.671135 | -0.93082 |
| 23                       | 9                        | 0                      | 13.5977  | -3.16902 | 1.747063 |
| 24                       | 9                        | 0                      | 11.03363 | -2.91282 | 1.598626 |
| 25                       | 6                        | 0                      | 9.667269 | -0.88368 | 0.116401 |
| 26                       | 6                        | 0                      | 8.766308 | -1.88132 | 0.413259 |
| 27                       | 6                        | 0                      | 7.426631 | -1.44181 | 0.293787 |
| 28                       | 6                        | 0                      | 7.305469 | -0.11905 | -0.08919 |
| 29                       | 16                       | 0                      | 8.850854 | 0.609507 | -0.35208 |
| 30                       | 16                       | 0                      | 5.877007 | -2.18373 | 0.489328 |

|    |    |   |          |          |          |
|----|----|---|----------|----------|----------|
| 31 | 6  | 0 | 5.06964  | -0.67932 | 0.064472 |
| 32 | 6  | 0 | 5.962893 | 0.319231 | -0.22166 |
| 33 | 6  | 0 | -0.77815 | -0.34738 | 0.043113 |
| 34 | 6  | 0 | -1.59809 | -1.20253 | -0.65906 |
| 35 | 6  | 0 | -2.96814 | -0.92557 | -0.4417  |
| 36 | 6  | 0 | -3.19497 | 0.12311  | 0.430056 |
| 37 | 16 | 0 | -1.71201 | 0.829777 | 0.969369 |
| 38 | 16 | 0 | -4.45263 | -1.61298 | -0.99788 |
| 39 | 6  | 0 | -5.38023 | -0.44636 | -0.05888 |
| 40 | 6  | 0 | -4.5676  | 0.406136 | 0.64388  |
| 41 | 6  | 0 | -9.77959 | -0.48765 | -0.15096 |
| 42 | 6  | 0 | -9.04411 | 0.73975  | -0.0135  |
| 43 | 6  | 0 | -7.62149 | 0.768193 | 0.01258  |
| 44 | 6  | 0 | -7.58302 | -1.58632 | -0.25607 |
| 45 | 6  | 0 | -8.9928  | -1.61024 | -0.29296 |
| 46 | 7  | 0 | -9.74745 | 1.886323 | 0.08087  |
| 47 | 6  | 0 | -9.10784 | 3.018313 | 0.190756 |
| 48 | 6  | 0 | -7.68514 | 3.053883 | 0.212596 |
| 49 | 7  | 0 | -6.98138 | 1.955998 | 0.124548 |
| 50 | 9  | 0 | -6.98922 | -2.77545 | -0.38789 |
| 51 | 9  | 0 | -9.52116 | -2.82449 | -0.46446 |
| 52 | 6  | 0 | -11.2468 | -0.55606 | -0.16058 |
| 53 | 6  | 0 | -12.0006 | -1.69739 | -0.00319 |
| 54 | 6  | 0 | -13.3868 | -1.44175 | -0.12795 |
| 55 | 6  | 0 | -13.6911 | -0.1181  | -0.38552 |
| 56 | 16 | 0 | -12.2667 | 0.858295 | -0.43915 |
| 57 | 16 | 0 | -14.8254 | -2.40706 | -0.02848 |
| 58 | 6  | 0 | -15.8099 | -1.00583 | -0.33331 |
| 59 | 6  | 0 | -15.0902 | 0.137337 | -0.49993 |
| 60 | 6  | 0 | -6.84702 | -0.43749 | -0.1009  |
| 61 | 8  | 0 | 3.702619 | 3.755797 | 1.913413 |
| 62 | 6  | 0 | 5.125568 | 3.667628 | 1.90891  |
| 63 | 8  | 0 | 11.72757 | 2.83175  | -2.34004 |
| 64 | 6  | 0 | 12.53825 | 3.790297 | -2.99641 |
| 65 | 8  | 0 | -9.88725 | 4.10619  | 0.27575  |
| 66 | 6  | 0 | -9.26945 | 5.375671 | 0.393738 |

|    |   |   |          |          |          |
|----|---|---|----------|----------|----------|
| 67 | 1 | 0 | 1.119212 | 3.675077 | 1.815997 |
| 68 | 1 | 0 | 15.07007 | -1.38843 | 0.482602 |
| 69 | 1 | 0 | 14.42185 | 2.355692 | -2.07549 |
| 70 | 1 | 0 | 9.054369 | -2.87874 | 0.704613 |
| 71 | 1 | 0 | 5.655972 | 1.317602 | -0.49529 |
| 72 | 1 | 0 | -1.23192 | -1.988   | -1.30049 |
| 73 | 1 | 0 | -4.95039 | 1.200662 | 1.265932 |
| 74 | 1 | 0 | -7.13371 | 3.985363 | 0.294245 |
| 75 | 1 | 0 | -11.5791 | -2.6701  | 0.193103 |
| 76 | 1 | 0 | -16.8847 | -1.11374 | -0.37471 |
| 77 | 1 | 0 | -15.5344 | 1.104082 | -0.69733 |
| 78 | 1 | 0 | 5.475073 | 4.578593 | 2.392248 |
| 79 | 1 | 0 | 5.464544 | 2.784082 | 2.455034 |
| 80 | 1 | 0 | 5.505812 | 3.612561 | 0.885023 |
| 81 | 1 | 0 | 11.84708 | 4.497009 | -3.45332 |
| 82 | 1 | 0 | 13.18353 | 4.32483  | -2.29    |
| 83 | 1 | 0 | 13.15162 | 3.331132 | -3.77991 |
| 84 | 1 | 0 | -10.0843 | 6.095975 | 0.448912 |
| 85 | 1 | 0 | -8.66527 | 5.446488 | 1.305345 |
| 86 | 1 | 0 | -8.64692 | 5.603597 | -0.47889 |

1

2 Computed data for **P3** and **P6**:

3 · Method:  $\omega$ B97XD/6-31G(d,p)

4 · Total electronic energy: -6095.51679943 a.u.

5 · Imaginary frequencies: 0

6 · Cartesian coordinates: (see below)

| Center<br>Number | Atomic<br>Number | Atomic<br>Type | X        | Y        | Z        |
|------------------|------------------|----------------|----------|----------|----------|
| 1                | 6                | 0              | 11.57914 | 0.815993 | 0.119661 |
| 2                | 6                | 0              | 12.96672 | 0.514668 | 0.103679 |
| 3                | 6                | 0              | 13.44623 | -0.83074 | 0.196873 |
| 4                | 6                | 0              | 12.4632  | -1.7969  | 0.258532 |
| 5                | 6                | 0              | 11.08953 | -1.50086 | 0.276789 |
| 6                | 7                | 0              | 11.16641 | 2.112242 | 0.020615 |
| 7                | 6                | 0              | 12.06077 | 3.048478 | -0.07978 |
| 8                | 6                | 0              | 13.45346 | 2.737003 | -0.0935  |

|    |    |   |          |          |          |
|----|----|---|----------|----------|----------|
| 9  | 7  | 0 | 13.88552 | 1.512587 | -0.00819 |
| 10 | 9  | 0 | 12.76068 | -3.09614 | 0.31585  |
| 11 | 9  | 0 | 10.27554 | -2.55777 | 0.351855 |
| 12 | 6  | 0 | 17.3457  | -1.33994 | -0.10478 |
| 13 | 6  | 0 | 16.80548 | -2.43536 | 0.489984 |
| 14 | 6  | 0 | 15.40468 | -2.37336 | 0.67636  |
| 15 | 6  | 0 | 14.87012 | -1.19224 | 0.218762 |
| 16 | 16 | 0 | 16.12917 | -0.16682 | -0.42257 |
| 17 | 9  | 0 | 17.51654 | -3.49722 | 0.879627 |
| 18 | 6  | 0 | 6.646889 | -0.06256 | 0.010442 |
| 19 | 6  | 0 | 7.120942 | 1.102408 | 0.556755 |
| 20 | 6  | 0 | 8.5185   | 1.189399 | 0.697923 |
| 21 | 6  | 0 | 9.148921 | 0.05317  | 0.255801 |
| 22 | 16 | 0 | 7.987989 | -1.11384 | -0.32375 |
| 23 | 9  | 0 | 6.313201 | 2.100954 | 0.936198 |
| 24 | 6  | 0 | 4.812863 | -1.59957 | -0.80578 |
| 25 | 6  | 0 | 3.417531 | -1.69475 | -0.93936 |
| 26 | 16 | 0 | 3.927568 | 0.602237 | 0.116117 |
| 27 | 9  | 0 | 5.625434 | -2.58771 | -1.20301 |
| 28 | 6  | 0 | 5.274367 | -0.43819 | -0.24679 |
| 29 | 6  | 0 | 10.59028 | -0.21907 | 0.217783 |
| 30 | 6  | 0 | -0.69414 | 1.080169 | -0.05735 |
| 31 | 6  | 0 | 0.711457 | 0.887596 | -0.07108 |
| 32 | 6  | 0 | 1.31869  | -0.35711 | -0.44272 |
| 33 | 6  | 0 | 0.421658 | -1.35778 | -0.76023 |
| 34 | 6  | 0 | -0.97128 | -1.17021 | -0.74885 |
| 35 | 7  | 0 | -1.21402 | 2.282128 | 0.314065 |
| 36 | 6  | 0 | -0.39003 | 3.228206 | 0.657543 |
| 37 | 6  | 0 | 1.025077 | 3.046279 | 0.644718 |
| 38 | 7  | 0 | 1.536242 | 1.907482 | 0.287126 |
| 39 | 9  | 0 | 0.817062 | -2.58529 | -1.11116 |
| 40 | 9  | 0 | -1.69478 | -2.23949 | -1.0861  |
| 41 | 6  | 0 | 2.770124 | -0.57065 | -0.47451 |
| 42 | 6  | 0 | -5.52606 | -0.19307 | -0.20082 |
| 43 | 6  | 0 | -5.15208 | 1.088887 | -0.51057 |
| 44 | 6  | 0 | -3.76746 | 1.31344  | -0.6284  |

|    |    |   |          |          |          |
|----|----|---|----------|----------|----------|
| 45 | 6  | 0 | -3.04382 | 0.168319 | -0.41087 |
| 46 | 16 | 0 | -4.1005  | -1.17626 | -0.06867 |
| 47 | 9  | 0 | -6.04139 | 2.079087 | -0.69314 |
| 48 | 6  | 0 | -7.2344  | -1.99441 | 0.303051 |
| 49 | 6  | 0 | -8.62001 | -2.213   | 0.408289 |
| 50 | 6  | 0 | -9.35103 | -1.07249 | 0.156726 |
| 51 | 16 | 0 | -8.28267 | 0.262758 | -0.2092  |
| 52 | 9  | 0 | -6.35039 | -2.97854 | 0.511326 |
| 53 | 6  | 0 | -6.86103 | -0.71934 | -0.02333 |
| 54 | 6  | 0 | -1.5848  | 0.016624 | -0.41176 |
| 55 | 6  | 0 | -12.9148 | 0.388875 | -0.04888 |
| 56 | 6  | 0 | -11.499  | 0.294745 | -0.08346 |
| 57 | 6  | 0 | -10.813  | -0.9369  | 0.178893 |
| 58 | 6  | 0 | -11.6418 | -2.00812 | 0.454273 |
| 59 | 6  | 0 | -13.0432 | -1.91532 | 0.495642 |
| 60 | 7  | 0 | -13.5245 | 1.577672 | -0.32613 |
| 61 | 6  | 0 | -12.787  | 2.608905 | -0.60584 |
| 62 | 6  | 0 | -11.3626 | 2.512224 | -0.62599 |
| 63 | 7  | 0 | -10.7496 | 1.391629 | -0.37537 |
| 64 | 9  | 0 | -11.1573 | -3.22391 | 0.718242 |
| 65 | 9  | 0 | -13.6868 | -3.04936 | 0.786692 |
| 66 | 6  | 0 | -17.6404 | -1.17161 | 0.150937 |
| 67 | 6  | 0 | -17.3567 | 0.082789 | 0.592883 |
| 68 | 6  | 0 | -15.976  | 0.380742 | 0.688445 |
| 69 | 6  | 0 | -15.1964 | -0.68378 | 0.316005 |
| 70 | 16 | 0 | -16.1898 | -2.04257 | -0.14276 |
| 71 | 9  | 0 | -18.2915 | 0.980444 | 0.917346 |
| 72 | 6  | 0 | -13.7306 | -0.74815 | 0.255808 |
| 73 | 8  | 0 | 14.2872  | 3.770907 | -0.19881 |
| 74 | 6  | 0 | 15.68097 | 3.472335 | -0.23425 |
| 75 | 8  | 0 | -10.6998 | 3.628842 | -0.91808 |
| 76 | 6  | 0 | -9.27514 | 3.548408 | -0.95369 |
| 77 | 8  | 0 | -0.8313  | 4.425513 | 1.047384 |
| 78 | 6  | 0 | -2.24341 | 4.614602 | 1.055951 |
| 79 | 1  | 0 | 11.73571 | 4.082016 | -0.16199 |
| 80 | 1  | 0 | 18.38402 | -1.15494 | -0.33433 |

|    |   |   |          |          |          |
|----|---|---|----------|----------|----------|
| 81 | 1 | 0 | 14.83732 | -3.17195 | 1.127871 |
| 82 | 1 | 0 | 9.02681  | 2.057397 | 1.086032 |
| 83 | 1 | 0 | 2.936088 | -2.5599  | -1.36376 |
| 84 | 1 | 0 | 1.688453 | 3.856085 | 0.93413  |
| 85 | 1 | 0 | -3.3324  | 2.275068 | -0.84848 |
| 86 | 1 | 0 | -9.0326  | -3.17545 | 0.65997  |
| 87 | 1 | 0 | -13.2686 | 3.556109 | -0.83284 |
| 88 | 1 | 0 | -18.6108 | -1.62088 | 0.005616 |
| 89 | 1 | 0 | -15.5888 | 1.338898 | 0.997936 |
| 90 | 1 | 0 | 16.18399 | 4.437291 | -0.27181 |
| 91 | 1 | 0 | 15.98199 | 2.913488 | 0.655475 |
| 92 | 1 | 0 | 15.92426 | 2.880049 | -1.12015 |
| 93 | 1 | 0 | -8.93484 | 4.550911 | -1.20756 |
| 94 | 1 | 0 | -8.87893 | 3.243849 | 0.017992 |
| 95 | 1 | 0 | -8.94588 | 2.830089 | -1.70829 |
| 96 | 1 | 0 | -2.40233 | 5.604707 | 1.480091 |
| 97 | 1 | 0 | -2.73712 | 3.850193 | 1.660977 |
| 98 | 1 | 0 | -2.64346 | 4.572362 | 0.038642 |

1

## 2 7. References

- 3 S1. S. Olivieri, R. Tarroni, N. Della Ca', R. Mancuso, B. Gabriele, G. Spadoni and C. Carfagna, *Adv. Synth.*  
4 *Catal.*, 2020, **362**, 533–540.
- 5 S2. M. J. Frisch, G. W. Trucks, H. B. Schlegel, G. E. Scuseria, M. A. Robb, J. R. Cheeseman, G. Scalmani,  
6 V. Barone, G. A. Petersson, H. Nakatsuji, X. Li, M. Caricato, A. V. Marenich, J. Bloino, B. G. Janesko, R.  
7 Gomperts, B. Mennucci, H. P. Hratchian, J. V. Ortiz, A. F. Izmaylov, J. L. Sonnenberg, D. Williams-Young,  
8 F. Ding, F. Lipparini, F. Egidi, J. Goings, B. Peng, A. Petrone, T. Henderson, D. Ranasinghe, V. G.  
9 Zakrzewski, J. Gao, N. Rega, G. Zheng, W. Liang, M. Hada, M. Ehara, K. Toyota, R. Fukuda, J. Hasegawa,  
10 M. Ishida, T. Nakajima, Y. Honda, O. Kitao, H. Nakai, T. Vreven, K. Throssell, J. A. Montgomery Jr., J. E.  
11 Peralta, F. Ogliaro, M. J. Bearpark, J. J. Heyd, E. N. Brothers, K. N. Kudin, V. N. Staroverov, T. A. Keith, R.  
12 Kobayashi, J. Normand, K. Raghavachari, A. P. Rendell, J. C. Burant, S. S. Iyengar, J. Tomasi, M. Cossi, J.  
13 M. Millam, M. Klene, C. Adamo, R. Cammi, J. W. Ochterski, R. L. Martin, K. Morokuma, O. Farkas, J. B.  
14 Foresman and D. J. Fox, *Gaussian 16, Revision C.02*; Gaussian, Inc., Wallingford, CT, 2019.
- 15 S3. J. Kang, S. Y. Kim, H. H. Jo and K. Zong, *ChemSusChem*, 2024, **17**, e202400216.
- 16 S4. W. He, Q. Liu, S. Otep, H. Matsumoto, S. Manzhos, P. Sonar, A. K. K. Kyaw and T. Michinobu, *Chin.*  
17 *J. Chem.*, 2023, **41**, 1028–1036.
- 18 S5. J. Mai, T.-K. Lau, J. Li, S.-H. Peng, C.-S. Hsu, U.-S. Jeng, J. Zeng, N. Zhao, X. Xiao and X. Lu, *Chem.*  
19 *Mater.*, 2016, **28**, 6186–6195.

- 1 S6. P. Yin, Y. Ma and Q. Zheng, *J. Mater. Chem. A*, 2022, **10**, 10400–10407.
- 2 S7. R. Po, G. Bianchi, C. Carbonera and A. Pellegrino, *Macromolecules*, 2015, **48**, 453–461.
- 3 S8. J. Kimpel, Y. Kim, J. Asatryan, J. Martín, R. Kroon and C. Müller, *Chem. Sci.*, 2024, **15**, 7679–7688.
- 4 S9. J. J. Rech, J. Neu, Y. Qin, S. Samson, J. Shanahan, R. F. Josey, H. Ade and W. You, *ChemSusChem*, 2021,
- 5 **14**, 3561–3568.
